# Supplementary material
Source: publisher figshare collection journal article supplement (https://acs.figshare.com/ndownloader/files/3823231)
Supplement: Supplementary file 1 [file 3823231]

## SUPPORTING INFORMATION

### Direct Macrolactonization of Seco Acids via Hafnium(IV) Catalysis.

Mylène de Léséleuc and Shawn K. Collins\*

Département de Chimie, Centre for Green Chemistry and Catalysis, Université de Montréal, CP 6128 Station  
Downtown, Montréal, Québec, CANADA H3C 3J7 shawn.collins@umontreal.ca

## SUPPORTING INFORMATION

### TABLE OF CONTENTS:

|                                                 |            |
|-------------------------------------------------|------------|
| <b>GENERAL</b>                                  | <b>S2</b>  |
| <b>SYNTHESIS OF MACROCYCLIZATION PRECURSORS</b> | <b>S3</b>  |
| <b>SYNTHESIS OF MACROCYCLES</b>                 | <b>S14</b> |
| <b>SYNTHESIS OF ESTERIFICATION PRECURSORS</b>   | <b>S19</b> |
| <b>SYNTHESIS OF ESTERS</b>                      | <b>S19</b> |
| <b>TABULAR DATA</b>                             | <b>S26</b> |
| <b>COMPETITION EXPERIMENTS</b>                  | <b>S28</b> |
| <b>SPECTRAL DATA</b>                            | <b>S29</b> |
| <b>REFERENCES</b>                               | <b>S69</b> |

## General:

All reactions that were carried out under anhydrous conditions were performed under an inert argon or nitrogen atmosphere in glassware that had previously been dried overnight at 120 °C or had been flame dried and cooled under a stream of argon or nitrogen.<sup>1</sup> All chemical products were obtained from Sigma-Aldrich Chemical Company or Strem Chemicals and were reagent quality. Technical solvents were obtained from VWR International Co. Methyl 3-iodobenzoate<sup>2</sup>, 9-(*tert*-butyldimethylsilyloxy)non-1-yne<sup>3</sup>, 11-(*tert*-butyldimethylsilyloxy)undec-1-yne<sup>4</sup>, 20-heneicosan-1-ol<sup>5</sup>, 8-(triisopropylsilyloxy)octanol<sup>6</sup>, 8-(*tert*-butyldimethylsilyloxy)octanol<sup>7</sup>, (2,2-dimethyl-1,3-dioxolan-4-yl) methanol<sup>8</sup>, 15-(*tert*-butyldimethylsilyloxy)pentadecanoic acid<sup>9</sup>, methyl (15-hydroxypentadecyl)-*L*-phenylalanyl-*L*-phenylalaninium trifluoroacetate<sup>10</sup>, 8-hydroxyoctan-1-ol acetate<sup>11</sup> and 12-oxooctadecanoic acid<sup>12</sup> were prepared according to literature procedure. Anhydrous solvents (CH<sub>2</sub>Cl<sub>2</sub>, Et<sub>2</sub>O, THF, DMF, toluene, and *n*-hexane) were dried and deoxygenated using a GlassContour system (Irvine, CA). Isolated yields reflect the mass obtained following flash column silica gel chromatography. Organic compounds were purified using the method reported by W. C. Still<sup>13</sup> and using silica gel obtained from Silicycle Chemical division (40-63 nm; 230-240 mesh). Analytical thin-layer chromatography (TLC) was performed on glass-backed silica gel 60 coated with a fluorescence indicator (Silicycle Chemical division, 0.25 mm, F<sub>254</sub>). Visualization of TLC plate was performed by UV (254 nm), KMnO<sub>4</sub> or *p*-anisaldehyde stains. All mixed solvent eluents are reported as v/v solutions. Concentration refers to removal of volatiles at low pressure on a rotary evaporator. All reported compounds were homogeneous by thin layer chromatography (TLC) and by <sup>1</sup>H NMR. NMR spectra were taken in deuterated CDCl<sub>3</sub> using Bruker AV-300 and AV-400 instruments unless otherwise noted. Signals due to the solvent served as the internal standard (CHCl<sub>3</sub>: δ 7.27 for <sup>1</sup>H, δ 77.0 for <sup>13</sup>C). The acquisition parameters are shown on all spectra. The <sup>1</sup>H NMR chemical shifts and coupling constants were determined assuming first-order behavior. Multiplicity is indicated by one or more of the following: s (singlet), d (doublet), t (triplet), q (quartet), m (multiplet), br (broad); the list of couplings constants (*J*) corresponds to the order of the multiplicity assignment. High resolution mass spectroscopy (HRMS) was done by the Centre régional de spectrométrie de masse at the Département de Chimie, Université de Montréal from an Agilent LC-MSD TOF system using ESI mode of ionization unless otherwise noted.

## SYNTHESIS OF MACROCYCLE PRECURSORS

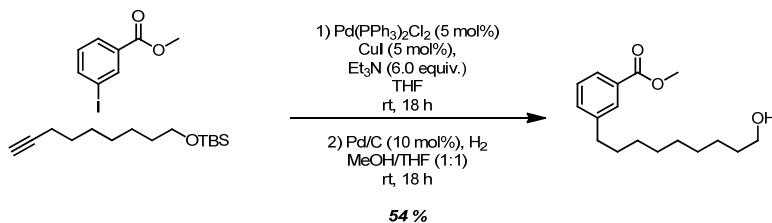

**Methyl 3-(9-hydroxynon-1-yl)benzoate (S1):** Methyl 3-iodobenzoate (500 mg, 1.91 mmol, 1.0 equiv.) was dissolved in tetrahydrofuran (10 mL, 0.2 M). Pd(PPh<sub>3</sub>)<sub>2</sub>Cl<sub>2</sub> (67 mg, 0.096 mmol, 0.05 equiv.) and CuI (18.3 mg, 0.096 mmol, 0.05 equiv.) were added to the solution and the reaction mixture was purged under N<sub>2</sub> for 5 minutes. Triethylamine (1.59 mL, 11.46 mmol, 6.0 equiv.) and the alkyne (592 mg, 2.10 mmol, 1.1 equiv.) were added and the reaction mixture was stirred at room temperature for 18 h. Silica (~10 mL) was added and the slurry was concentrated under reduced pressure and passed through a short pad of silica (20 % EtOAc in hexanes). The crude was dissolved in a mixture of methanol (5 mL) and tetrahydrofuran (5 mL). Pd/C (405 mg, 5% w/w, 0.191 mmol, 0.1 equiv.) was added and the reaction mixture was purged with H<sub>2</sub> for 10 minutes. A balloon filled with H<sub>2</sub> equipped with a syringe was put on the septum and the reaction mixture was stirred at room temperature for 18 hours. The reaction mixture was passed through a short pad of Celite® and concentrated under reduced pressure. Purification by flash chromatography (10% to 30% EtOAc in hexanes) was performed to afford the desired product as a colorless oil (253 mg, 54 %). <sup>1</sup>H NMR (400 MHz, CDCl<sub>3</sub>) δ 7.86 (m, 2H), 7.36 (m, 2H), 3.92 (s, 3H), 3.64 (t, *J* = 6.8 Hz), 2.65 (t, *J* = 8.0 Hz), 1.65-1.55 (m, 4H), 1.38-1.31 (m, 10H) ppm; <sup>13</sup>C NMR (100 MHz, CDCl<sub>3</sub>) δ 167.3, 143.2, 133.1, 130.0, 129.5, 128.2, 126.9, 63.0, 52.0, 35.7, 32.7, 31.3, 29.4, 29.3, 29.3, 29.1, 25.7 ppm; HRMS (ESI+) for C<sub>17</sub>H<sub>27</sub>O<sub>3</sub> [M + H]<sup>+</sup> calculated: 278.1882 found: 278.1893.

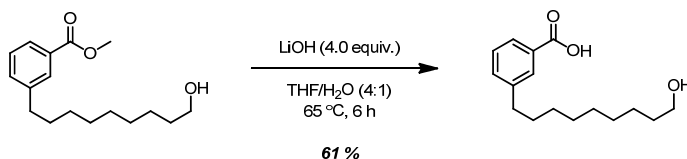

**3-(9-Hydroxynon-1-yl)benzoic acid (S2):** Methyl 3-(9-hydroxynon-1-yl)benzoate (253 mg, 0.91 mmol, 1.0 equiv.) was dissolved in tetrahydrofuran (4.8 mL). LiOH (87 mg, 3.64 mmol, 4.0 equiv.) was added as an aqueous solution (1.2 mL). The reaction mixture was stirred at 65 °C for 6 h. The reaction mixture was cooled down to room temperature and HCl 1M was added until the mixture was neutralized (pH = 7). Extraction with EtOAc (3 X 5 mL) was performed and the combined organic phases were washed with brine (15 mL). The organic phase was dried over Na<sub>2</sub>SO<sub>4</sub> and concentrated under reduced pressure to afford the desired product as a white solid (145 mg, 61 %). <sup>1</sup>H NMR (400 MHz, CDCl<sub>3</sub>) δ 7.94 (m, 2H), 7.43-7.36 (m, 2H), 6.78 (br s, 1H (OH)), 3.66 (t, *J* = 6.4 Hz, 2H), 2.67 (t, *J* = 7.6 Hz, 2H), 1.66-1.55 (m, 4H), 1.31 (m, 10H) ppm; <sup>13</sup>C NMR (100 MHz,

CDCl<sub>3</sub>)  $\delta$  171.8, 143.3, 133.8, 130.0, 129.4, 128.4, 127.5, 63.0, 35.6, 32.6, 31.2, 29.4, 29.32, 29.29, 29.1, 25.7 ppm; HRMS (ESI<sup>+</sup>) for C<sub>16</sub>H<sub>25</sub>O<sub>3</sub> [M + H]<sup>+</sup> calculated: 264.1725 found: 264.1738.

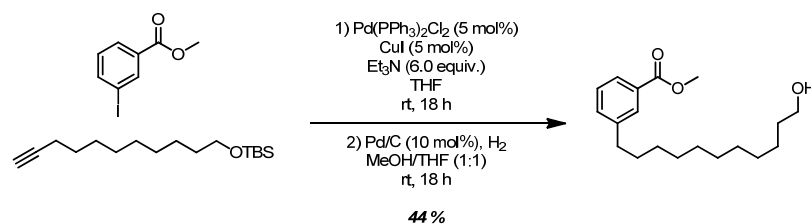

**Methyl 3-(11-hydroxyundec-1-yl)benzoate (S3):** Methyl 3-iodobenzoate (300 mg, 1.15 mmol, 1.0 equiv.) was dissolved in tetrahydrofuran (6 mL, 0.2 M). Pd(PPh<sub>3</sub>)<sub>2</sub>Cl<sub>2</sub> (40 mg, 0.057 mmol, 0.05 equiv.) and CuI (11 mg, 0.057 mmol, 0.05 equiv.) were added to the solution and the reaction mixture was purged under N<sub>2</sub> for 5 minutes. Triethylamine (0.95 mL, 6.87 mmol, 6.0 equiv.) and the alkyne (355 mg, 1.26 mmol, 1.1 equiv.) were added and the reaction mixture was stirred at room temperature for 18 h. Silica (~ 10 mL) was added and the slurry was concentrated under reduce pressure and passed through a short pad of silica (20 % EtOAc in hexanes). The crude was dissolved in a mixture of methanol (5 mL) and tetrahydrofuran (5 mL). Pd/C (244 mg, 5% w/w, 1.15 mmol, 0.1 equiv.) was added and the reaction mixture was purged with H<sub>2</sub> for 10 minutes. A balloon filled with H<sub>2</sub> equipped with a syringe was put on the septum and the reaction mixture was stirred at room temperature for 18 hours. The reaction mixture was passed through a short pad of Celite® and concentrated under reduced pressure. Purification by flash chromatography (10 % to 30 % EtOAc in hexanes) was performed to the desired product as a colorless oil (154 mg, 44 %). <sup>1</sup>H NMR (400 MHz, CDCl<sub>3</sub>)  $\delta$  7.86 (m, 2H), 7.36 (m, 2H), 3.92 (s, 3H), 3.64 (t, *J* = 6.8 Hz, 2H), 2.65 (t, *J* = 7.2 Hz), 1.65-1.55 (m, 4H), 1.31-1.27 (m, 14H) ppm; <sup>13</sup>C NMR (100 MHz, CDCl<sub>3</sub>)  $\delta$  167.3, 143.2, 133.1, 130.0, 129.5, 128.2, 126.9, 63.1, 52.0, 35.7, 32.8, 31.3, 29.55, 29.51, 29.48, 29.42, 29.38, 29.2, 25.7 ppm; HRMS (ESI<sup>+</sup>) for C<sub>19</sub>H<sub>31</sub>O<sub>3</sub> [M + H]<sup>+</sup> calculated: 306.2195 found: 306.2207.

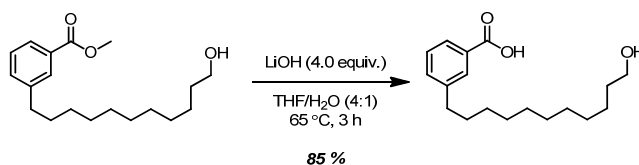

**3-(11-Hydroxyundec-1-yl)benzoic acid (S4):** Methyl 3-(11-hydroxyundec-1-yl)benzoate (154 mg, 0.50 mmol, 1.0 eq) was dissolved in tetrahydrofuran (4 mL). LiOH (48 mg, 2.01 mmol, 4.0 eq) was added as an aqueous solution (1 mL). The reaction mixture was stirred at 65 °C for 3h. The reaction mixture was cooled down to room temperature and HCl 1M was added until the mixture was neutralized (pH = 7). Extraction with EtOAc (3X 5 mL) was performed and the combined organic phases were washed with brine (15 mL). The organic phase was dried over Na<sub>2</sub>SO<sub>4</sub> and concentrated under reduced pressure to afford

the desired product acid as a white solid (125 mg, 85 %).  $^1\text{H}$  NMR (400 MHz,  $\text{CDCl}_3$ )  $\delta$  7.94 (m, 2H), 7.44-7.37 (m, 2H), 3.67 (t,  $J$  = 6.6 Hz, 2H), 2.68 (t,  $J$  = 7.4 Hz, 2H), 1.67-1.55 (m, 4H), 1.33-1.28 (m, 14H) ppm;  $^{13}\text{C}$  NMR (75 MHz,  $\text{CDCl}_3$ )  $\delta$  170.9, 143.3, 133.9, 130.1, 129.1, 128.4, 127.5, 63.1, 35.6, 32.7, 31.2, 29.5, 29.44, 29.42, 29.38, 29.3, 29.0, 25.7 ppm; HRMS (ESI+) for  $\text{C}_{18}\text{H}_{29}\text{O}_3$   $[\text{M} + \text{H}]^+$  calculated: 293.2111 found: 293.2110.

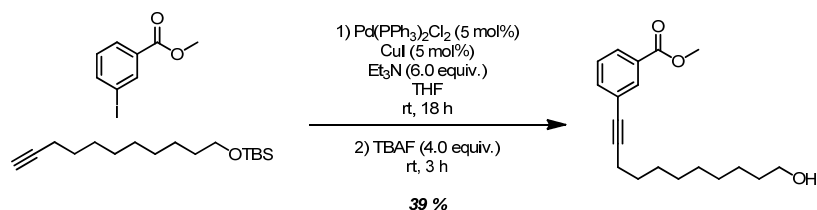

**Methyl 3-(11-hydroxyundec-1-yn-1-yl)benzoate (S5):** Methyl 3-iodobenzoate (165 mg, 0.629 mmol, 1.0 equiv.) was dissolved in tetrahydrofuran (3 mL, 0.2 M).  $\text{Pd}(\text{PPh}_3)_2\text{Cl}_2$  (22 mg, 0.032 mmol, 0.05 equiv.) and  $\text{CuI}$  (6.1 mg, 0.032 mmol, 0.05 equiv.) were added to the solution and the reaction mixture was purged under  $\text{N}_2$  for 5 minutes. Triethylamine (0.53 mL, 3.77 mmol, 6.0 equiv.) and the alkyne (195 mg, 0.691 mmol, 1.1 equiv.) were added and the reaction mixture was stirred at room temperature for 18 h. Silica ( $\sim 10$  mL) was added and the slurry was concentrated under reduce pressure and passed through a short pad of silica (20 % EtOAc in hexanes). The crude was dissolved in THF (12 mL) and TBAF (2.43 mL as 1M solution in THF, 2.43 mmol, 4.0 equiv.) was added to the solution. The reaction mixture was stirred at room temperature for 3 hours and was then quenched by adding  $\text{NH}_4\text{Cl}$  saturated solution (10 mL). Extraction with EtOAc was performed (2 x 10 mL) and the organic phase was washed with water (20 mL) and brine (20 mL). The organic phase was then dried over  $\text{Na}_2\text{SO}_4$  and concentrated under reduced pressure. The crude was purified by flash chromatography (20% EtOAc in hexanes) to afford the desired product as a colorless oil (74 mg, 39 % over two steps).  $^1\text{H}$  NMR (400 MHz,  $\text{CDCl}_3$ )  $\delta$  8.07 (s, 1H), 7.93 (d,  $J$  = 7.7 Hz, 1H), 7.56 (d,  $J$  = 7.4 Hz, 1H), 7.36 (dd,  $J$  = 7.6 Hz, 7.6 Hz, 1H), 3.92 (s, 3H), 3.65 (t,  $J$  = 6.6Hz, 2H), 2.42 (t,  $J$  = 7.0Hz, 2H), 1.65-1.55 (m, 4H), 1.50-1.42 (m, 2H), 1.34 (m, 8H) ppm;  $^{13}\text{C}$  NMR (100 MHz,  $\text{CDCl}_3$ )  $\delta$  166.6, 135.7, 132.7, 130.2 128.4, 128.3, 124.5, 91.5, 79.6, 63.0, 52.2, 32.8, 29.4, 29.3, 29.0, 28.8, 28.6, 25.7, 19.3 ppm; HRMS (ESI+) for  $\text{C}_{19}\text{H}_{27}\text{O}_3$   $[\text{M} + \text{H}]^+$  calculated: 303.1955, found: 303.1965.

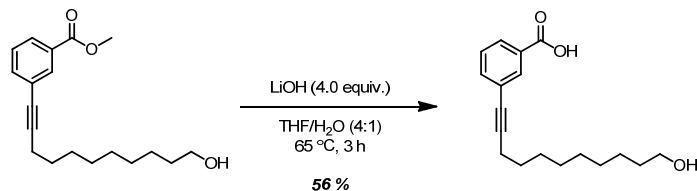

**3-(11-Hydroxyundec-1-yn-1-yl)benzoic acid (S6):** Methyl 3-(11-hydroxyundec-1-yn-1-yl)benzoate (74 mg, 0.243 mmol, 1.0 eq) was dissolved in tetrahydrofuran (3.2 mL).  $\text{LiOH}$

(23 mg, 0.972 mmol, 4.0 eq) was added as an aqueous solution (0.8 mL). The reaction mixture was stirred at 65 °C for 3 h. The reaction mixture was cooled down to room temperature and HCl 1M was added until the mixture was neutralized (pH = 7). Extraction with EtOAc (3X 5 mL) was performed and the combined organic phases were washed with brine (15 mL). The organic phase was dried over Na<sub>2</sub>SO<sub>4</sub> and concentrated under reduced pressure to afford the desired product as a white solid (39 mg, 56 %) (Note: Seco acid **S6** is highly insoluble in CDCl<sub>3</sub> which made it difficult to obtain quality <sup>1</sup>H and <sup>13</sup>C spectra). <sup>1</sup>H NMR (400 MHz, CDCl<sub>3</sub>) δ 8.14 (s, 1H), 7.99 (d, *J* = 7.6 Hz, 1H), 7.61 (d, *J* = 8.0 Hz, 1H), 7.40 (dd, *J* = 8.0 Hz, 8.0 Hz, 1H), 7.49 (br s, 1H (OH)), 3.67 (t, *J* = 6.4 Hz, 2H), 2.42 (t, *J* = 6.8 Hz, 2H), 1.64-1.58 (4H), 1.50-1.47 (m, 2H), 1.35 (m, 10H) ppm; <sup>13</sup>C NMR (75 MHz, CDCl<sub>3</sub>) δ 170.8, 136.4, 133.3, 129.0, 128.4, 124.7, 91.8, 79.6, 63.0, 32.6, 29.4, 29.3, 29.0, 28.8, 28.5, 25.7, 19.3 ppm; HRMS (ESI+) for C<sub>18</sub>H<sub>25</sub>O<sub>3</sub> [M + H]<sup>+</sup> calculated: 289.1798, found: 289.1800.

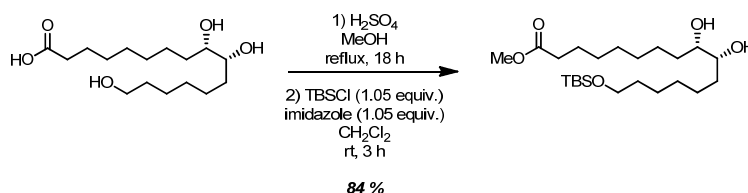

**(±)-erythro-Methyl 16-tert-butylidimethylsilyloxy-9,10-dihydroxyhexadecanoate (S7)**  
 (±)-erythro-aleuritic acid (500 mg, 1.64 mmol, 1.0 equiv.) was dissolved in MeOH (40 mL). Concentrated H<sub>2</sub>SO<sub>4</sub> (5-10 drops) was added to the solution. The reaction mixture was heated to reflux for 18 hours and then brought back to room temperature and quenched by the addition of a K<sub>2</sub>CO<sub>3</sub> saturated solution (until pH = 7). Extraction was performed by the addition of EtOAc (100 mL) and water (50 mL). The aqueous phase was extracted with EtOAc (2 x 50 mL). The combined organic phases were washed with H<sub>2</sub>O (100 mL) and brine (75 mL), dried over Na<sub>2</sub>SO<sub>4</sub> and concentrated under reduced pressure. The crude was dissolved in CH<sub>2</sub>Cl<sub>2</sub> (15 mL). TBSCl (260 mg, 1.72 mmol, 1.05 equiv.) and imidazole (117 mg, 1.72 mmol, 1.05 equiv.) were added to the solution. The reaction mixture was stirred at room temperature for 3 hours and was quenched by the addition of water (10 mL). Extraction was performed with EtOAc (2 x 25 mL) and the combined organic phases were washed with water (20 mL) and brine (20 mL). Silica gel was added (10 mL) and the slurry was concentrated under reduced pressure. Flash chromatography was performed (25 % EtOAc in hexanes) to afford the desired product as a white solid (534 mg, 84 % over two steps). <sup>1</sup>H NMR (400 MHz, CDCl<sub>3</sub>) δ 3.68 (s, 3H), 3.62 (t, *J* = 6.8 Hz, 2H), 3.42-3.40 (m, 2H), 2.32 (t, *J* = 7.2 Hz, 2H), 2.08-2.04 (br s, 2H (OH)), 1.65-1.62 (m, 2H), 1.53-1.34 (m, 20H), 0.92 (s, 9H), 0.06 (s, 6H) ppm; <sup>13</sup>C NMR (100 MHz, CDCl<sub>3</sub>) δ 174.3, 74.5, 74.4, 63.2, 51.4, 34.0, 33.6 (2C), 32.8, 29.5, 29.4, 29.1, 29.0, 26.0, 25.8, 25.6, 25.5, 24.9, 18.4, -5.3 ppm; HRMS (ESI+) for C<sub>23</sub>H<sub>49</sub>O<sub>5</sub>Si [M + H]<sup>+</sup> calculated : 433.3344 found: 433.3364.

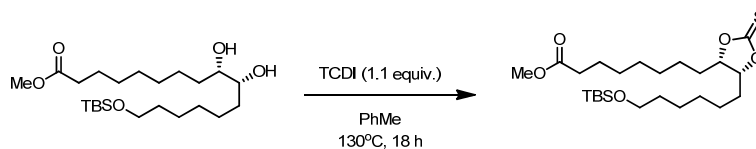

98 %

**(±)-erythro-Methyl 8-((6-*tert*-butyldimethylsilyloxy)hexyl-2-thioxo-1,3-dioxolan-4-yl)octanoate (S8).** The diol **S7** (200 mg, 0.462 mmol, 1.0 equiv.) was dissolved in PhMe (3.0 mL) in a sealed tube. TCDI was added (90.4 mg, 0.508 mmol, 1.1 equiv.) and the reaction vial was sealed and the mixture was stirred at 130°C for 18 hours. The solution was cooled down to room temperature and silica gel (10 mL) was added and the slurry was concentrated under reduced pressure. Flash chromatography was performed (5-10 % EtOAc in hexanes) to afford the desired product (215 mg, 98 %) as a colorless oil. <sup>1</sup>H NMR (400 MHz, CDCl<sub>3</sub>) δ 4.46-4.44 (m, 2H), 3.68 (s, 3H), 3.61 (t, *J*= 6.4Hz, 2H), 2.32 (t, *J*=7.2 Hz, 2H), 1.80-1.60 (m, 6H), 1.53-1.50 (m, 4H), 1.40-1.30 (m, 12H), 0.90 (s, 9H), 0.05 (s, 6H) ppm; <sup>13</sup>C NMR (75 MHz, CDCl<sub>3</sub>) δ 191.7, 174.2, 86.8 (2C), 63.0, 51.5, 34.0, 33.25, 33.21, 32.6, 29.0, 28.92 (2C), 28.90, 25.9, 25.6, 24.8, 24.64, 24.59, 18.4, -5.3 ppm; HRMS (ESI+) for C<sub>24</sub>H<sub>47</sub>O<sub>5</sub>SSi [M + H]<sup>+</sup> calculated: 475.2908 found: 475.2927.

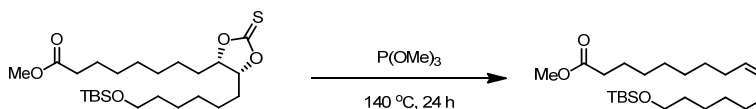

62 %

**Methyl (Z)-16-(*tert*-butyldimethylsilyloxy)hexadec-9-enoate (S9)** The thiocarbonate **S8** (200mg, 0.423 mmol, 1.0 equiv.) was dissolved in trimethylphosphite (10 mL) in a sealed tube. The reaction mixture was stirred at 140°C for 24 hours. The solution was cooled to room temperature and concentrated under reduced pressure. Flash chromatography (3 % EtOAc in hexanes) was performed to afford the desired product as a colorless oil (101 mg, 62 %) <sup>1</sup>H NMR (400 MHz, CDCl<sub>3</sub>) δ 5.39-5.38 (m, 2H), 3.67 (s, 3H), 3.60 (t, *J*= 6.4Hz, 2H), 2.31 (t, *J*= 6.8Hz, 2H), 1.94 (m, 4H), 1.35-1.30 (m, 4H), 1.30 (m, 14H), 0.90 (s, 9H), 0.05 (s, 6H) ppm; <sup>13</sup>C NMR (100 MHz, CDCl<sub>3</sub>) δ 174.3, 130.3 (2C), 63.3, 51.4, 34.1, 32.8, 32.54, 32.52, 29.6, 29.5, 29.1 (2C), 28.9(2C), 26.0, 25.6, 24.9, 18.4, -5.3 ppm; HRMS (ESI+) for C<sub>23</sub>H<sub>47</sub>O<sub>3</sub>Si [M + H]<sup>+</sup> calculated: 399.3289 found: 399.3301.

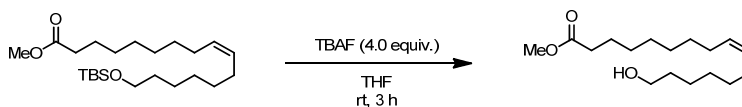

58 %

**Methyl (Z)-16-hydroxyhexadec-9-enoate (S10)** Compound **S9** (100 mg, 0.263 mmol, 1.0 equiv.) was dissolved in THF (4 mL). A solution of TBAF (1M in THF) (1.05 mL, 4.0 equiv.) was added and the mixture was stirred at room temperature for 3 hours. The reaction was quenched by the addition of water (5 mL). Extraction with EtOAc (2 x 10

mL) was performed and the combined organic layers were washed with water (20 mL) and brine (20 mL). The organic phase was then dried under Na<sub>2</sub>SO<sub>4</sub> and concentrated under reduced pressure. Flash chromatography (40 % EtOAc in hexanes) was performed to afford the desired product as a colorless oil (41 mg, 58 %). <sup>1</sup>H NMR (400 MHz, CDCl<sub>3</sub>) δ 5.38-5.36 (m, 2H), 3.66 (s, 3H), 3.63 (t, *J* = 6.8 Hz, 2H), 2.30 (t, *J* = 7.2 Hz, 2H), 1.96, (m, 4H), 1.62-1.54 (m, 4H), 1.35-1.28 (m, 14H) ppm; <sup>13</sup>C NMR (100 MHz, CDCl<sub>3</sub>) δ 174.3, 130.3, 130.2, 63.0, 51.4, 34.1, 32.7, 32.5, 32.4, 29.50, 29.48, 29.1 (2C), 28.9, 28.8, 25.6, 24.9 ppm; HRMS (ESI+) for C<sub>17</sub>H<sub>33</sub>O<sub>3</sub> [M + H]<sup>+</sup> calculated: 285.2424 found: 285.2436.

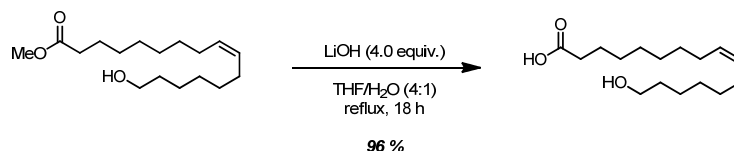

**(Z)-16-hydroxyhexadec-9-enoic acid (S11)** The methyl ester **S10** (41 mg, 0.152 mmol, 1.0 equiv.) was dissolved in THF (1.6 mL). LiOH (15 mg, 0.608 mmol, 4.0 equiv.) was dissolved in water (0.4 mL) and added to the previous mixture. The solution was stirred at reflux for 18 hours. The reaction mixture was cooled down to room temperature and HCl 1M was added until the mixture was neutralized (pH = 7). Extraction with EtOAc (3 X 5 mL) was performed and the combined organic phases were washed with brine (15 mL). The organic phase was dried over Na<sub>2</sub>SO<sub>4</sub> and concentrated under reduced pressure to afford the product as a white solid (39 mg, 96 %). <sup>1</sup>H NMR (400 MHz, CDCl<sub>3</sub>) δ 5.38-5.37 (m, 2H), 3.65 (t, *J* = 6.7 Hz, 2H), 2.34 (t, *J* = 7.4 Hz, 2H), 1.99-1.96 (m, 4H), 1.63-1.57 (m, 4H), 1.40-1.25 (m, 14H) ppm; <sup>13</sup>C NMR (75 MHz, CDCl<sub>3</sub>) δ 178.9, 130.4, 130.3, 63.0, 34.0, 32.6, 32.45, 32.43, 29.5, 29.03, 29.00, 28.8, 28.7, 25.6, 24.7 ppm; HRMS (ESI+) for C<sub>16</sub>H<sub>31</sub>O<sub>3</sub> [M + H]<sup>+</sup> calculated 271.2268 found: 271.2273.

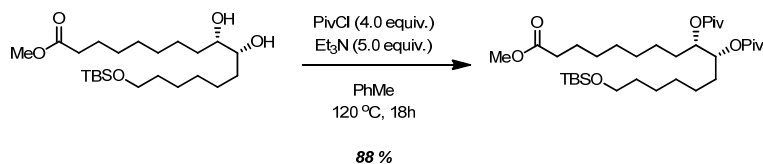

**(±)-erythro-Methyl 16-(tert-butyldimethylsilyloxy)heptadecane-8,9-diyl[bis(2,2-dimethylpropanoate)]oate (S12)** The diol **S7** (206 mg, 0.476 mmol, 1.0 equiv.) was dissolved in PhMe (5 mL) in a sealed tube. Et<sub>3</sub>N (0.33 mL, 2.30 mmol, 5.0 equiv.) was added followed by PivCl (0.23 mL, 1.90 mmol, 4.0 equiv.). The reaction mixture was stirred at 120 °C for 18 hours. The reaction was quenched by addition of water (5 mL). Extraction with EtOAc was performed (2 x 5 mL) and the combined organic layers were washed with brine (10 mL), dried over Na<sub>2</sub>SO<sub>4</sub> and concentrated under reduce pressure. Flash chromatography (10 % EtOAc in hexanes) was performed to afford the desired product (252 mg, 88 %) as a colorless oil. <sup>1</sup>H NMR (400 MHz, CDCl<sub>3</sub>) δ 4.98 (m, 2H), 3.67 (s, 3H), 3.59 (t, *J* = 6.8 Hz, 2H), 2.30 (t, *J* = 7.6 Hz, 2H), 1.63-1.48 (m, 8H), 1.30-1.23 (m, 12H), 1.22 (s, 18H) ppm; <sup>13</sup>C NMR (75 MHz, CDCl<sub>3</sub>) δ 177.8 (2C), 174.2, 73.3 (2C),



63.1, 51.4, 38.9 (2C), 34.1, 32.7, 30.8, 29.23, 29.20, 29.02, 29.00, 27.2 (2 x C(CH<sub>3</sub>)<sub>3</sub>), 26.0, 25.6, 25.0, 24.9, 18.4, -5.3ppm; HRMS (ESI+) for C<sub>33</sub>H<sub>64</sub>O<sub>7</sub>SiNa [M + Na]<sup>+</sup> calculated 623.4314 found: 623.4310.

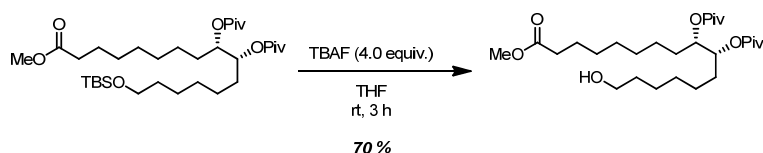

**(±)-erythro-Methyl 16-hydroxyheptadecane-9,10-diyl[bis(2,2-dimethylpropanoate)]oate (S13)** Compound **S12** (163 mg, 0.272 mmol, 1.0 equiv.) was dissolved in THF (1.5 mL). A solution of TBAF (1M in THF) (1.09 mL, 4.0 equiv.) was added and the mixture was stirred at room temperature for 3 hours. The reaction was quenched by the addition of water (5 mL). Extraction with EtOAc (2 x 10 mL) was performed and the combined organic layers were washed with water (20 mL) and brine (20 mL). The organic phase was then dried under Na<sub>2</sub>SO<sub>4</sub> and concentrated under reduce pressure. Flash chromatography (40 % EtOAc in hexanes) was performed to afford the desired product as a colorless oil (93 mg, 70 %). <sup>1</sup>H NMR (300 MHz, CDCl<sub>3</sub>) δ 4.98 (m, 2H), 3.67 (s, 3H), 3.63 (t, *J*= 6.6Hz, 2H), 2.29 (t, *J*= 7.8Hz, 2H), 1.65-1.50 (m, 8H), 1.45-1.30 (m, 16H), 1.22 (s, 18H) ppm; <sup>13</sup>C NMR (75 MHz, CDCl<sub>3</sub>) δ 177.8 (2C), 174.3, 73.2 (2C), 62.9, 51.4, 38.9 (2C), 34.0, 32.6, 30.8, 30.7, 29.2, 29.1, 29.01, 29.00, 27.2 (2 x C(CH<sub>3</sub>)<sub>3</sub>), 25.5, 25.0, 24.9 ppm; HRMS (ESI+) for C<sub>27</sub>H<sub>51</sub>O<sub>7</sub> [M + H]<sup>+</sup> calculated 487.3629 found: 487.3652

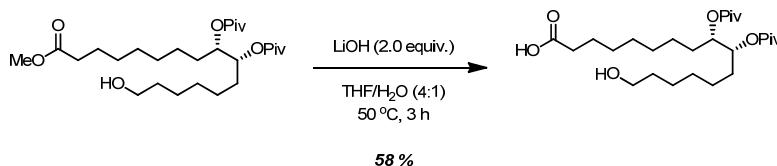

**(±)-erythro-16-Hydroxyheptadecane-9,10-diyl[bis(2,2-dimethylpropanoate)]oic acid (S14)** Compound **S13** (93 mg, 0.191 mmol, 1.0 equiv.) was dissolved in THF (2.0 mL). LiOH (16 mg, 0.382 mmol, 2.0 equiv.) was dissolved in water (0.5 mL) and added to the THF solution of **S13**. The solution was stirred at 50 °C for 3 hours. The reaction mixture was cooled down to room temperature and HCl 1M was added until the mixture was neutralized (pH = 7). Extraction with EtOAc (3 X 5 mL) was performed and the combined organic phases were washed with brine (15 mL). The organic phase was dried over Na<sub>2</sub>SO<sub>4</sub> and concentrated under reduced pressure to afford the desired product as a colorless oil (52 mg, 58 %). <sup>1</sup>H NMR (300 MHz, CDCl<sub>3</sub>) δ 4.99-4.96 (m, 2H), 3.63 (t, *J*= 6.5 Hz, 2H), 2.33 (t, *J*= 7.2 Hz, 2H), 1.64-1.23 (m, 24H), 1.21 (s, 18H) ppm; <sup>13</sup>C NMR (75 MHz, CDCl<sub>3</sub>) δ 178.9, 177.9 (2C), 73.2 (2C), 62.8, 38.9 (2C), 33.9, 32.4, 30.7, 30.6, 29.0 (2C), 28.9, 28.8, 27.2 (2 x C(CH<sub>3</sub>)<sub>3</sub>), 25.4, 24.9, 24.6 ppm; HRMS (ESI+) for C<sub>26</sub>H<sub>48</sub>O<sub>7</sub>Na [M + Na]<sup>+</sup> calculated 495.3292 found: 495.3306.

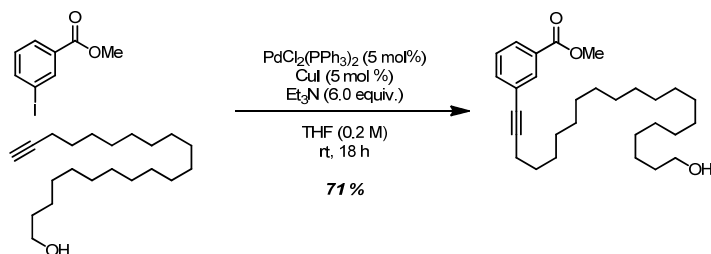

**Methyl 3-(21-hydroxyheptacos-1-yn-1-yl)benzoate (S15)** Methyl 3-iodobenzoate (218 mg, 0.832 mmol, 1.0 equiv.) was dissolved in tetrahydrofuran (5 mL, 0.2 M). Pd(PPh<sub>3</sub>)<sub>2</sub>Cl<sub>2</sub> (29 mg, 0.042 mmol, 0.05 equiv.) and CuI (8.0 mg, 0.042 mmol, 0.05 equiv.) were added to the solution and the reaction mixture was purged under N<sub>2</sub> for 5 minutes. Triethylamine (0.69 mL, 4.99 mmol, 6.0 equiv.) and the alkyne (256 mg, 0.832 mmol, 1.0 eq) were added and the reaction mixture was stirred at room temperature for 18 h. Silica (~5 mL) was added and the slurry was concentrated under reduce pressure. Flash chromatography (5 to 20 % EtOAc in hexanes) was performed to afford the desired product (261 mg, 71 %) as a yellow solid. <sup>1</sup>H NMR (400 MHz, CDCl<sub>3</sub>) δ 8.07 (dd, *J*= 1.6 Hz, 1.6 Hz, 1H), 7.93 (dd, *J*= 7.6 Hz, 7.6 Hz, 1.6 Hz, 1H), 7.56 (ddd, *J*= 7.6 Hz, 7.6 Hz, 1.6 Hz, 1H), 7.36 (dd, *J*= 7.6 Hz, 7.6 Hz, 1H), 3.92 (s, 3H), 3.64 (t, *J*= 6.4 Hz, 2H), 2.41 (t, *J*= 6.8 Hz, 2H), 1.65-1.52 (m, 4H), 1.48-1.35 (m, 2H), 1.26 (m, 28H) ppm; <sup>13</sup>C NMR (75 MHz, CDCl<sub>3</sub>) δ 166.6, 135.7, 132.7, 130.2, 128.4, 128.3, 124.5, 91.6, 79.6, 63.1, 52.2, 32.8, 29.7 (4C), 29.62, 29.59, 29.58, 29.5, 29.4, 29.1, 28.9, 28.6, 25.7, 19.4 ppm; HRMS (ESI<sup>+</sup>) for C<sub>29</sub>H<sub>47</sub>O<sub>3</sub> [M + H]<sup>+</sup> calculated: 443.3520 found: 443.3520.

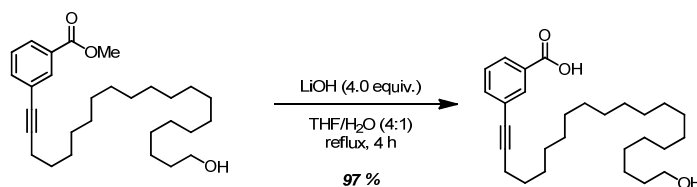

**3-(21-Hydroxyheptacos-1-yn-1-yl)benzoic acid (S16)** The methyl ester **S15** (100 mg, 0.226 mmol, 1.0 equiv.) was dissolved in THF (4.0 mL). LiOH (38 mg, 0.903 mmol, 4.0 equiv.) was dissolved in water (1.0 mL) and added to the previous mixture. The solution was stirred at reflux for 4 hours. The reaction mixture was cooled down to room temperature and HCl 1M was added until the mixture was neutralized (pH = 7). Extraction with EtOAc (3 X 5 mL) was performed and the combined organic phases were washed with brine (15 mL). The organic phase was dried over Na<sub>2</sub>SO<sub>4</sub> and concentrated under reduced pressure to afford the desired product as white solid (94 mg, 97 %). (Note: Seco acid **S16** is highly insoluble in CDCl<sub>3</sub> which made it difficult to obtain quality <sup>1</sup>H and <sup>13</sup>C spectra). <sup>1</sup>H NMR (400 MHz, CDCl<sub>3</sub>) δ 8.12 (s, 1H), 7.98 (d, *J*= 7.7 Hz, 1H), 7.61 (d, *J*= 7.7 Hz, 1H), 7.39 (dd, *J*= 7.7 Hz, 7.7 Hz, 1H), 3.67 (t, *J*= 6.3 Hz, 2H), 2.42 (t, *J*= 7.0 Hz, 2H), 1.64-1.58 (m, 4H), 1.52-1.42 (m, 2H), 1.40-1.22 (m, 26H); <sup>13</sup>C NMR (175 MHz, CDCl<sub>3</sub>) δ 168.4, 136.3, 133.2, 129.2, 129.0, 128.4, 124.7, 91.8, 79.5, 63.2, 32.7, 29.64, 29.63, 29.62, 29.61, 29.60 (2C), 29.58 (2C) 29.6, 29.55, 29.47, 29.4, 29.1, 28.9, 28.6,

25.7, 19.4 ppm; HRMS (ESI+) for  $C_{28}H_{44}O_3Na$   $[M + Na]^+$  calculated: 451.3191 found: 451.3183.

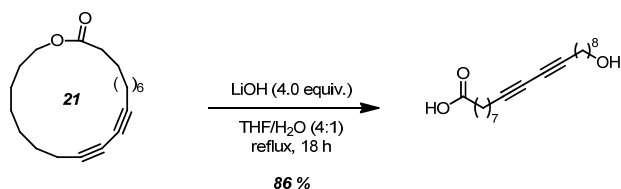

**20-Hydroxyicosa-10,12-dienoic acid (S17)** The macro lactone<sup>14</sup> (150 mg, 0.47 mmol, 1.0 equiv) was dissolved in tetrahydrofuran (8.0 mL). LiOH (79 mg, 1.88 mmol, 4.0 equiv.) was added as dissolved in water (2.0 mL) and added to the previous mixture. The solution was stirred at reflux for 18 hours. The reaction mixture was cooled down to room temperature and HCl 1M was added until the mixture was neutralized (pH = 7). Extraction with EtOAc (3 x 10 mL) was performed and the combined organic phases were washed with brine (25 mL). The organic phase was dried over  $Na_2SO_4$  and concentrated under reduced pressure to afford the desired product as a white solid (130 mg, 86 %). (Note: Seco acid **S17** is highly insoluble in  $CDCl_3$  which made it difficult to obtain quality  $^1H$  and  $^{13}C$  spectra).  $^1H$  NMR (400 MHz,  $CDCl_3$ )  $\delta$  6.46 (bs, OH), 3.66 (t,  $J$  = 5.0 Hz, 2H), 2.45-2.32 (m, 2H), 2.25 (t,  $J$  = 5.6 Hz, 4H), 1.72-1.46 (m, 6H), 1.43-1.22 (m, 16H) ppm;  $^{13}C$  NMR (100 MHz,  $CDCl_3$ )  $\delta$  179.6, 77.42 (2C), 65.3 (2C), 63.0, 33.9, 32.6, 29.7, 29.0 (2C), 28.9, 28.8, 28.7, 28.2 (2C), 25.5, 24.6, 24.5, 19.2 ppm; HRMS (ESI+) for  $C_{20}H_{33}O_3$   $[M + H]^+$  calculated: 321.2426 found: 321.2424.

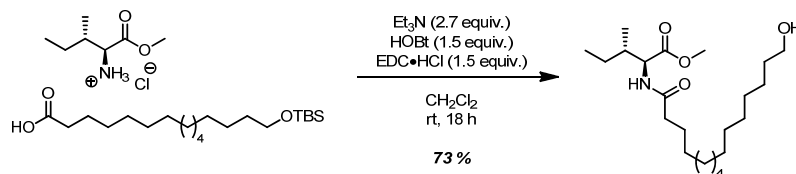

**Methyl (15-hydroxypentadecanoyl)-L-isoleucinate (S18)** The isoleucine salt (500 mg, 2.75 mmol, 1.2 equiv.) and  $Et_3N$  (0.86 mL, 6.18 mmol, 2.7 equiv.) were added in  $CH_2Cl_2$  (10 mL) and the mixture was stirred at room temperature upon complete dissolution. 15-(tert-butyldimethylsilyloxy)pentadecanoic acid was added (854 mg, 2.29 mmol, 1.0 equiv.) to the solution followed by HOBt (464 mg, 3.44 mmol, 1.5 equiv.) and EDC•HCl (660 mg, 3.44 mmol, 1.5 equiv.) and the mixture was stirred at room temperature for 18 hours. The mixture was diluted with  $CH_2Cl_2$  (5 mL) and washed with a 5 % w/w citric acid aqueous solution (10 mL) and a  $NaHCO_3$  saturated aqueous solution (10 mL). The organic phase was dried over  $Na_2SO_4$  and concentrated under reduced pressure. Flash chromatography (10 to 40 % EtOAc in hexanes) was performed to afford the *in-situ* TBS-deprotected product (640 mg, 73 %) as a white solid.  $^1H$  NMR (400 MHz,  $CDCl_3$ )  $\delta$  6.08

(d,  $J = 8.4$  Hz, 1H (NH)), 4.59 (dd,  $J = 8.7$  Hz, 5.0 Hz, 1H), 3.70 (s, 3H), 3.60 (t,  $J = 6.6$  Hz, 2H), 2.20 (t,  $J = 7.3$  Hz, 2H), 1.90 (br s, 1H (OH)), 1.89-1.80 (m, 1H), 1.65-1.50 (m, 4H), 1.48-1.35 (m, 1H), 1.34-1.20 (m, 20H), 1.19-1.05 (m, 1H), 0.92-0.86 (m, 6H) ppm;  $^{13}\text{C}$  NMR (100 MHz,  $\text{CDCl}_3$ )  $\delta$  172.9, 172.7, 62.8, 56.1, 51.9, 37.9, 36.6, 32.7, 29.5 (2C), 29.4 (3C), 29.35, 29.33, 29.2, 29.1, 25.7, 25.6, 25.1, 15.3, 11.4 ppm; HRMS (ESI+) for  $\text{C}_{22}\text{H}_{44}\text{NO}_4$   $[\text{M} + \text{H}]^+$  calculated 386.3265 found: 386.3282.

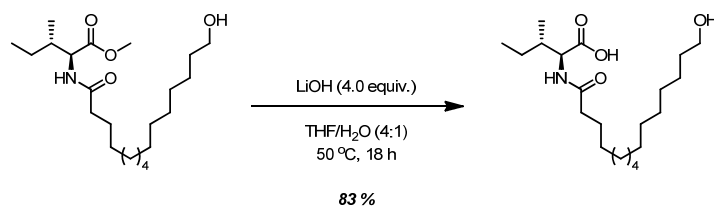

**(15-hydroxypentadecanoyl)-L-isoleucine (S19)** The methyl ester **S18** (527 mg, 1.37 mmol, 1.0 equiv.) was dissolved in THF (20 mL). LiOH (230 mg, 548 mmol, 4.0 equiv.) was dissolved in  $\text{H}_2\text{O}$  (5 mL) and was added to the previous solution. The reaction mixture was stirred at 50 °C for 18 hours and was then cooled down to room temperature. HCl 1M was added until the mixture was neutralized (pH = 7). Extraction with EtOAc (3 x 25 mL) was performed and the combined organic phases were washed with brine (100 mL). The organic phase was dried over  $\text{Na}_2\text{SO}_4$  and concentrated under reduced pressure to afford the desired product as a white solid (421 mg, 83 %).  $^1\text{H}$  NMR (400 MHz,  $\text{CDCl}_3$ )  $\delta$  6.17 (d,  $J = 8.5$  Hz, 1H (NH)), 5.64 (br s, 1H (OH)), 4.61 (dd,  $J = 8.5$  Hz, 4.8 Hz, 1H), 3.66 (t,  $J = 6.7$  Hz, 2H), 2.25 (t,  $J = 7.4$  Hz, 2H), 1.97-1.87 (m, 1H), 1.68-1.45 (m, 5H), 1.40-1.12 (m, 21H), 0.95-0.92 (m, 6H) ppm;  $^{13}\text{C}$  NMR (100 MHz,  $\text{CDCl}_3$ )  $\delta$  174.8, 173.8, 63.0, 56.4, 37.6, 36.6, 32.6, 29.5, 29.43 (2C), 29.41 (2C), 29.32, 29.30, 29.1, 29.1, 25.6 (2C), 25.1, 15.4, 11.6 ppm; HRMS (ESI+) for  $\text{C}_{21}\text{H}_{40}\text{NO}_4$   $[\text{M} + \text{H}]^+$  calculated 370.2963 found: 370.2962.

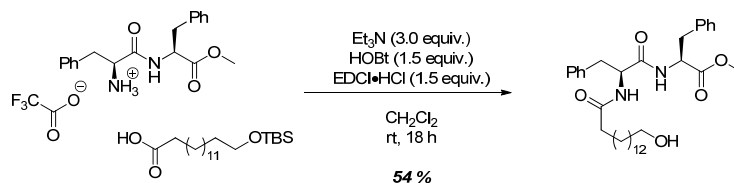

**Methyl (15-hydroxypentadecyl)-L-phenylalanyl-L-phenylalaninate (S20)** Phe-Phe methyl ester TFA salt (343 mg, 0.780 mmol, 1.0 equiv.) was dissolved in  $\text{CH}_2\text{Cl}_2$  (8 mL). 15-(tert-butyldimethylsilyloxy)pentadecanoic acid was added (290 mg, 0.780 mmol, 1.0 equiv.) to the solution followed by HOBt (158 mg, 1.17 mmol, 1.5 equiv.), EDCI•HCl (225 mg, 1.17 mmol, 1.5 equiv.) and  $\text{Et}_3\text{N}$  (0.33 mL, 2.34 mmol, 3.0 equiv.) and the

mixture was stirred at room temperature for 18 hours. The mixture was diluted with CH<sub>2</sub>Cl<sub>2</sub> (5 mL) and washed with a 5 % w/w citric acid aqueous solution (10 mL) and a NaHCO<sub>3</sub> saturated aqueous solution (10 mL). The organic phase was dried over Na<sub>2</sub>SO<sub>4</sub> and concentrated under reduced pressure. Flash chromatography (30 % to 100 % EtOAc in hexanes) was performed to afford the desired product (237 mg, 54 %) as a white solid. <sup>1</sup>H NMR (CDCl<sub>3</sub>, 400 MHz) δ 7.29-7.18 (m, 8H), 7.02-7.00 (m, 2H), 6.39 (d, J= 7.4 Hz, 1H), 6.11 (d, J= 7.6 Hz, 1H), 4.74 (ddd, J= 7.4 Hz, 7.4 Hz, 6.3 Hz, 1H), 4.66 (ddd, J= 7.6 Hz, 7.6 Hz, 7.1 Hz, 1H), 3.68 (s, 3H), 3.63 (t, J= 6.6 Hz, 2H), 3.10-2.94 (m, 4H), 2.11 (t, J= 7.0 Hz, 2H), 1.60-1.48 (m, 4H), 1.37-1.20 (m, 20H) ppm; <sup>13</sup>C NMR (CDCl<sub>3</sub>, 100 MHz) δ 173.0, 171.2, 170.6, 136.4, 135.6, 129.3, 129.1, 128.54, 128.50, 127.1, 126.9, 63.0, 54.0, 53.4, 52.2, 38.0, 37.8, 36.5, 32.8, 29.51 (2C), 29.49 (2C), 29.37, 29.35, 29.2, 29.1, 25.7, 25.5 ppm; HRMS (ESI +) for C<sub>34</sub>H<sub>51</sub>N<sub>2</sub>O<sub>5</sub> (M + H<sup>+</sup>) calculated mass : 567.3793, found 567.3805.

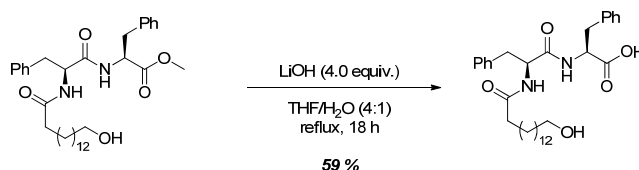

**(15-hydroxypentadecyl)-L-phenylalanyl-L-phenylalanine (S21)** The methyl ester **S20** (210 mg, 0.371 mmol, 1.0 equiv.) was dissolved in THF (6 mL). LiOH (62 mg, 1.48 mmol, 4.0 equiv.) was dissolved in H<sub>2</sub>O (1.5 mL) and was added to the previous solution. The reaction mixture was stirred at 50 °C for 18 hours and was then cooled down to room temperature. HCl 1M was added until the mixture was neutralized (pH = 7). Extraction with EtOAc (3 x 10 mL) was performed and the combined organic phases were washed with brine (20 mL). The organic phase was dried over Na<sub>2</sub>SO<sub>4</sub> and concentrated under reduced pressure to afford the desired product as a white solid (120 mg, 59 %). <sup>1</sup>H NMR (DMSO-d<sub>6</sub>, 400 MHz) δ 12.71 (br s, 1H), 8.19 (d, J=7.8 Hz, 1H), 7.92 (d, J= 8.7 Hz, 1H), 7.27-7.15 (m, 10H), 4.55 (ddd, J= 7.8 Hz, 5.2 Hz, 4.0 Hz, 1H), 4.44 (ddd, J= 10.4 Hz, 8.7 Hz, 8.4 Hz, 1H), 4.33 (br s, 1H), 3.37 (t, J= 6.6 Hz, 2H), 3.08 (dd, J= 13.9 Hz, 5.2 Hz, 1H), 2.98 (dd, J= 14.0 Hz, 4.0 Hz, 1H), 2.93 (dd, J= 13.6 Hz, 8.4 Hz, 1H), 2.68 (dd, J= 13.9 Hz, 10.4 Hz, 1H), 1.96 (t, J= 6.8 Hz, 2H), 1.41-1.02 (m, 24 H) ppm; <sup>13</sup>C NMR (DMSO-d<sub>6</sub>, 100 MHz) δ 172.7, 171.9, 171.5, 138.0, 137.4, 129.1 (2C), 128.1, 127.8, 126.4, 126.1, 60.7, 53.4, 37.4, 36.6, 35.2, 32.5, 29.11, 29.06 (2C), 29.04 (3C), 28.97, 28.89, 28.8, 28.4, 25.5, 25.2 ppm; HRMS (ESI +) for C<sub>33</sub>H<sub>48</sub>N<sub>2</sub>O<sub>5</sub>Na (M + Na<sup>+</sup>) calculated mass : 575.3455, found 575.3460.

## SYNTHESIS OF MACROLACTONES

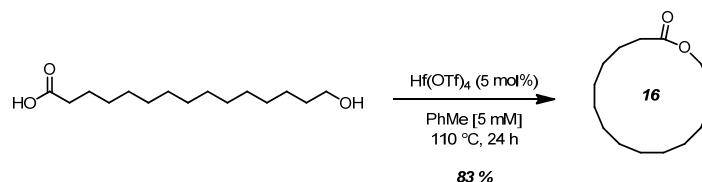

**1-Oxacyclohexadecan-2-one (2)** 15-Hydroxypentadecanoic acid (26 mg, 0.10 mmol, 1.0 equiv.) was dissolved in toluene (20 mL, 5 mM).  $\text{Hf}(\text{OTf})_4$  (3.9 mg, 0.005 mmol, 0.05 equiv.) was added to the solution and the reaction mixture heated to 110 °C. The reaction mixture was stirred at this temperature for 24 h. After cooling down to room temperature, silica gel (~ 1 mL) was added and the slurry was concentrated under reduce pressure and purified by flash chromatography (3 %  $\text{Et}_2\text{O}$  in hexanes) to the desired product as a white solid (20 mg, 83 %). Spectral data were in accordance with those previously reported in the literature.<sup>9</sup>

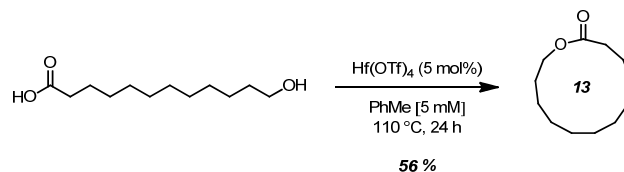

**1-Oxacyclotridecan-2-one (4)** 12-Hydroxypentadecanoic acid (22 mg, 0.10 mmol, 1.0 equiv.) was dissolved in toluene (20 mL, 5 mM).  $\text{Hf}(\text{OTf})_4$  (3.9 mg, 0.005 mmol, 0.05equiv.) was added to the solution and the reaction mixture heated to 110 °C. The reaction mixture was stirred at this temperature for 24 h. After cooling down to room temperature, silica gel (~ 1 mL) was added and the slurry was concentrated under reduced pressure and purified by flash chromatography (3 %  $\text{Et}_2\text{O}$  in hexanes) to afford the desired product as a colorless oil (11 mg, 56 %). Spectral data were in accordance with those previously reported in the literature.<sup>9</sup>

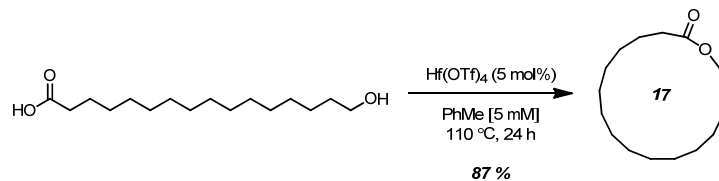

**1-Oxacycloheptadecan-2-one (5)** 16-Hydroxypentadecanoic acid (27 mg, 0.10 mmol, 1.0 equiv.) was dissolved in toluene (20 mL, 5 mM).  $\text{Hf}(\text{OTf})_4$  (3.9 mg, 0.005 mmol, 0.05equiv.) was added to the solution and the reaction mixture heated to 110 °C. The reaction mixture was stirred at this temperature for 24 h. After cooling down to room temperature, silica gel (~ 1 mL) was added and the slurry was concentrated under reduce pressure and purified by flash chromatography (3 %  $\text{Et}_2\text{O}$  in hexanes) to afford the desired

product as a white solid (22 mg, 87 %). Spectral data were in accordance with those previously reported in the literature.<sup>9</sup>

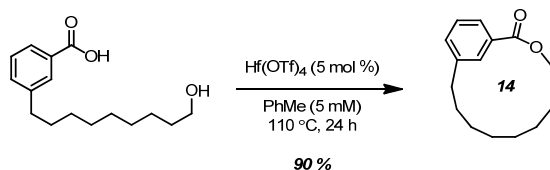

**3-Oxabicyclo[11.3.1]heptadeca-1(17),13,15-trien-2-one (6):** 3-(9-Hydroxynonyl)benzoic acid (26 mg, 0.10 mmol, 1.0 equiv.) was dissolved in toluene (20 mL, 5 mM). Hf(OTf)<sub>4</sub> (3.9 mg, 0.005 mmol, 0.05 equiv.) was added to the solution and the reaction mixture heated to 110 °C. The reaction mixture was stirred at this temperature for 24 h. After cooling down to room temperature, silica gel (~ 1 mL) was added and the slurry was concentrated under reduce pressure and purified by flash chromatography (3 % EtOAc in hexanes) to the desired product as a white solid (22 mg, 90 %). <sup>1</sup>H NMR (400 MHz, CDCl<sub>3</sub>) δ 8.02 (s, 1H), 7.85 (d, *J*=6.7 Hz, 1H), 7.39-7.35 (m, 2H), 4.38 (t, *J*= 5.0 Hz, 2H), 2.81(t, *J*= 5.5 Hz, 2H), 1.82-1.78 (m, 4H), 1.66-1.62 (m, 2H), 1.52 (m, 6H), 1.38-1.36 (m, 2H) ppm; <sup>13</sup>C NMR (75 MHz, CDCl<sub>3</sub>) δ 168.7, 141.2, 133.8, 130.4, 128.6, 128.4, 126.5, 66.3, 31.8, 28.5, 27.9, 27.5, 26.7, 26.6, 25.1, 24.3 ppm; HRMS (ESI+) for C<sub>16</sub>H<sub>23</sub>O<sub>2</sub> [M + H]<sup>+</sup> calculated: 247.1693 found: 247.1693.

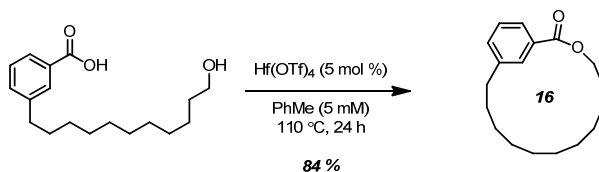

**3-Oxabicyclo[13.3.1]nonadeca-1(19),15,17-trien-2-one (7) :** 3-(11-Hydroxyundec-1-yl)benzoic acid (29 mg, 0.10 mmol, 1.0 equiv.) was dissolved in toluene (20 mL, 5 mM). Hf(OTf)<sub>4</sub> (3.9 mg, 0.005 mmol, 0.05equiv.) was added to the solution and the reaction mixture heated to 110 °C. The reaction mixture was stirred at this temperature for 24 h. After cooling down to room temperature, silica gel (~ 1 mL) was added and the slurry was concentrated under reduced pressure and purified by flash chromatography (3 % EtOAc in hexanes) to afford the desired product (23 mg, 84 %). <sup>1</sup>H NMR (400 MHz, CDCl<sub>3</sub>) δ 7.92-7.90 (m, 2H), 7.39-7.35 (m, 2H), 4.38 (t, *J*= 5.4 Hz, 2H), 2.75 (t, *J*= 6.2Hz, 2H), 1.80-1.68 (m, 4H), 1.58-1.52 (m, 2H), 1.31-1.24 (m, 12H) ppm; <sup>13</sup>C NMR (100 MHz, CDCl<sub>3</sub>) δ 166.8, 142.1, 133.6, 130.3, 129.1, 128.5, 127.2, 65.0, 33.4, 28.5, 27.51, 27.48, 27.45, 27.37, 27.3, 26.9, 25.6, 25.4 ppm; HRMS (ESI+) for C<sub>18</sub>H<sub>27</sub>O<sub>2</sub> [M + H]<sup>+</sup> calculated: 275.2006 found: 275.2005.

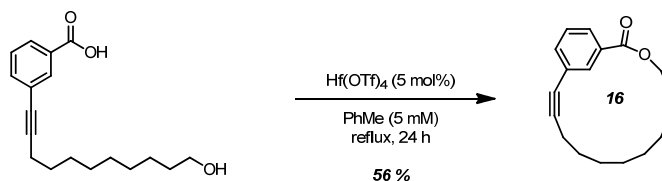

**3-Oxobicyclo[13.3.1]nonadeca-1(19)-15,17-trien-13-yn-2-one (8)** The hydroxyacid **S6** (29 mg, 0.10 mmol, 1.0 equiv.) was dissolved in toluene (20 mL, 5 mM).  $\text{Hf}(\text{OTf})_4$  (3.9 mg, 0.005 mmol, 0.05equiv.) was added to the solution and the reaction mixture heated to 110 °C. The reaction mixture was stirred at this temperature for 24 h. After cooling down to room temperature, silica gel (~ 1 mL) was added and the slurry was concentrated under reduced pressure and purified by flash chromatography (3 % EtOAc in hexanes) to afford the desired product (15 mg, 56 %) as a white solid.  $^1\text{H}$  NMR (400 MHz,  $\text{CDCl}_3$ )  $\delta$  = 8.30 (dd,  $J$  = 1.5 Hz, 1.5 Hz 1H), 7.92 (dd,  $J$  = 7.7 Hz, 7.7 Hz, 1.5 Hz, 1H), 7.42 - 7.49 (m, 1H), 7.34-7.42 (m, 1H), 4.34 - 4.41 (m, 2H), 2.41 - 2.48 (m, 2H), 1.82-1.80 (m, 2H), 1.77 -1.65 (m, 8H), 1.57-1.41 (m, 4H) ppm;  $^{13}\text{C}$  NMR (100 MHz,  $\text{CDCl}_3$ )  $\delta$  = 165.8, 136.2, 132.5, 130.6, 128.6, 128.1, 124.5, 93.6, 82.1, 66.4, 30.6, 30.1, 29.9, 28.8, 28.4, 28.2, 27.7, 19.2 ppm; HRMS (ESI)  $m/z$  calculated for  $\text{C}_{18}\text{H}_{23}\text{O}_2$   $[\text{M}+\text{H}]^+$  271.1693; found 271.1693.

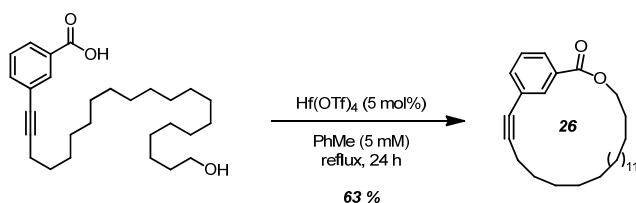

**3-Oxobicyclo[23.3.1]nonacosa-1(29)-25,27-trien-23-yn-2-one (9)** The hydroxyacid **S16** (43 mg, 0.10 mmol, 1.0 equiv.) was dissolved in toluene (20 mL, 5 mM).  $\text{Hf}(\text{OTf})_4$  (3.9 mg, 0.005 mmol, 0.05 equiv.) was added to the solution and the reaction mixture heated to 110 °C. The reaction mixture was stirred at this temperature for 24 h. After cooling down to room temperature, silica gel (~ 1 mL) was added and the slurry was concentrated under reduced pressure and purified by flash chromatography (3 % EtOAc in hexanes) to afford the desired product as a white solid (26 mg, 63 %).  $^1\text{H}$  NMR (400 MHz,  $\text{CDCl}_3$ )  $\delta$  8.06 (dd,  $J$  = 1.6 Hz, 1.6 Hz, 1H), 7.96 (ddd,  $J$  = 8.0 Hz, 8.0 Hz, 1.6 Hz, 1H), 7.57 (ddd,  $J$  = 8.4 Hz, 8.4 Hz, 1.6 Hz, 1H), 7.37 (dd,  $J$  = 8.0 Hz, 8.0 Hz, 1H), 4.34 (t,  $J$  = 6.4 Hz, 2H), 2.44 (t,  $J$  = 7.2 Hz, 2H), 1.82-1.62 (m, 2 H), 1.66-1.60 (m, 2H), 1.51-1.35 (m, 4H), 1.27 (m, 26H) ppm;  $^{13}\text{C}$  NMR (75 MHz,  $\text{CDCl}_3$ )  $\delta$  166.2, 135.5, 132.5, 130.7, 128.7, 128.3, 124.4, 91.5, 79.9, 65.3, 29.6, 28.96, 28.91, 28.84, 28.82, 28.80, 28.79, 28.77, 28.74, 28.72 (2C), 28.70, 28.65, 28.60, 28.4, 28.3, 26.0, 19.3 ppm; HRMS (ESI+) for  $\text{C}_{28}\text{H}_{42}\text{O}_2$   $[\text{M} + \text{H}]^+$  calculated: 411.3258 found: 411.3249.



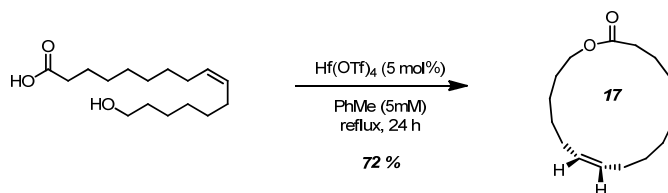

**(9Z)-isoambrettolide (10)** (Z)-16-Hydroxyhexadec-9-enoic acid (27 mg, 0.10 mmol, 1.0 equiv.) was dissolved in toluene (20 mL, 5 mM).  $\text{Hf}(\text{OTf})_4$  (3.9 mg, 0.005 mmol, 0.05 equiv.) was added to the solution and the reaction mixture heated to 110 °C. The reaction mixture was stirred at this temperature for 24 h. After cooling down to room temperature, silica gel (~ 1 mL) was added and the slurry was concentrated under reduced pressure and purified by flash chromatography (3 %  $\text{Et}_2\text{O}$  in hexanes) to afford the desired product as a white solid (18 mg, 72 %). Spectral data were in accordance with those previously reported in the literature<sup>15</sup>.

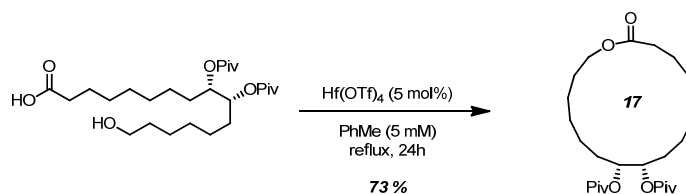

**(±)-erythro-10,11-Bis[2,2-(dimethyl)propanoate]oxaheptadecan-2-one (11)** The hydroxyacid **S14** (47 mg, 0.10 mmol, 1.0 equiv.) was dissolved in toluene (20 mL, 5 mM).  $\text{Hf}(\text{OTf})_4$  (3.9 mg, 0.005 mmol, 0.05 equiv.) was added to the solution and the reaction mixture heated to 110 °C. The reaction mixture was stirred at this temperature for 24 h. After cooling down to room temperature, silica gel (~ 1 mL) was added and the slurry was concentrated under reduced pressure and purified by flash chromatography (10 %  $\text{Et}_2\text{O}$  in hexanes) to afford the desired product as a colorless oil (33 mg, 73 %).  $^1\text{H}$  NMR (400 MHz,  $\text{CDCl}_3$ )  $\delta$  5.10-5.05 (m, 1H), 5.03-4.98 (m, 1H), 4.18-4.10 (m, 2H), 2.34 (t,  $J$ = 6.4 Hz, 2H), 1.75-1.25 (m, 22H), 1.19 (s, 9H), 1.18 (s, 9H);  $^{13}\text{C}$  NMR (75 MHz,  $\text{CDCl}_3$ )  $\delta$  177.8, 177.7, 174.0, 73.2, 72.3, 64.1, 38.8, 34.6, 30.0, 29.2, 28.6, 28.1, 28.0, 27.7, 27.5, 27.22, 27.20, 25.6, 25.0, 23.7, 22.7 ppm; HRMS (ESI+) for  $\text{C}_{26}\text{H}_{46}\text{O}_6\text{Na}$  [ $\text{M} + \text{Na}$ ]<sup>+</sup> calculated: 477.3187 found: 477.3166.

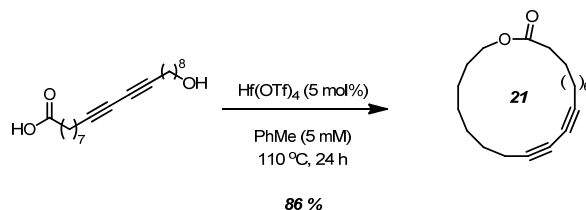

**Oxacycloicosa-10,12-diyne-2-one (12)** The hydroxyacid **S17** (32 mg, 0.10 mmol, 1.0 equiv.) was dissolved in toluene (20 mL, 5 mM).  $\text{Hf}(\text{OTf})_4$  (3.9 mg, 0.005 mmol, 0.05 equiv.) was added to the solution and the reaction mixture heated to 110 °C. The reaction mixture was stirred at this temperature for 24 h. After cooling down to room temperature, silica gel (~ 1 mL) was added and the slurry was concentrated under reduced pressure and

purified by flash chromatography (10 % EtOAc in hexanes) to afford the macrocycle as a white solid (26 mg, 86 %). Spectral data were in accordance with those previously reported in the literature<sup>14</sup>.

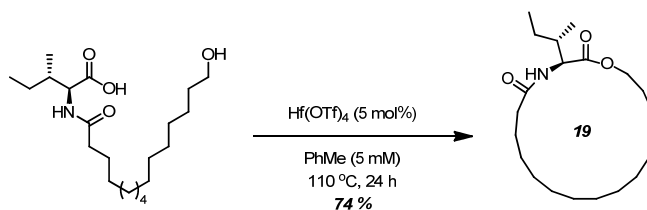

**(S)-3-((S)-sec-butyl)-1-oxa-4-azacyclononadecane-2,5-dione (13)** The hydroxyacid **S19** (64 mg, 0.173 mmol, 1.0 equiv.) was dissolved in toluene (35 mL, 5 mM).  $\text{Hf(OTf)}_4$  (6.7 mg, 0.0087 mmol, 0.05 equiv.) was added to the solution and the reaction mixture heated to 110 °C. The reaction mixture was stirred at this temperature for 24 h. After cooling down to room temperature, silica gel (~ 2 mL) was added and the slurry was concentrated under reduced pressure and purified by flash chromatography (10 to 50 % EtOAc in hexanes) to afford the macrocycle as a white solid (45 mg, 74 %).  $^1\text{H}$  NMR (400 MHz,  $\text{CDCl}_3$ )  $\delta$  5.90 (d,  $J$  = 8.5 Hz, 1H (NH)), 4.61 (dd,  $J$  = 8.7 Hz, 5.2 Hz, 1H), 4.40-4.34 (m, 1H), 3.99 (dt,  $J$  = 10.7 Hz, 5.7 Hz, 1H), 2.33 (dt,  $J$  = 14.6 Hz, 6.4 Hz, 1H), 2.19-2.12 (m, 1H), 1.92-1.86 (m, 1H), 1.80-1.50 (m, 4H), 1.49-1.38 (m, 1H), 1.37-1.20 (m, 20H), 1.20-1.10 (m, 1H), 0.95-0.91 (m, 6H) ppm;  $^{13}\text{C}$  NMR (100 MHz,  $\text{CDCl}_3$ )  $\delta$  172.7, 171.8, 64.9, 56.6, 38.0, 36.5, 28.5, 28.09, 28.07, 28.04, 28.01, 27.9, 27.5, 27.1, 27.0, 25.20, 25.19, 25.0, 15.4, 11.5 ppm; HRMS (ESI+) for  $\text{C}_{21}\text{H}_{40}\text{NO}_3$   $[\text{M} + \text{H}]^+$  calculated: 354.3003 found: 354.3008.

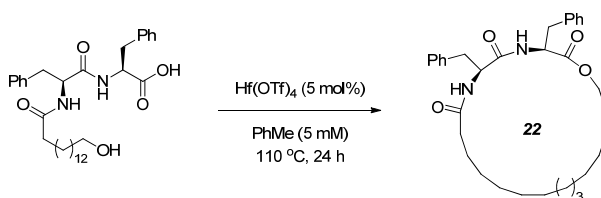

**(3S, 6S)-3,6-dibenzyl-1-oxa-4,7-diazacyclodocosane-2,5-dione (14)** The hydroxyacid **S21** (65 mg, 0.1119 mmol, 1.0 equiv.) was dissolved in toluene (24 mL, 5 mM).  $\text{Hf(OTf)}_4$  (4.6 mg, 0.0056 mmol, 0.05 equiv.) was added to the solution and the reaction mixture heated to 110 °C. The reaction mixture was stirred at this temperature for 24 h. After cooling down to room temperature, silica gel (~ 2 mL) was added and the slurry was concentrated under reduced pressure and purified by flash chromatography (10 to 60 % EtOAc in hexanes) to afford the macrocycle as a white solid (37 mg, 57 %).  $^1\text{H}$  NMR ( $\text{CDCl}_3$ , 300 MHz)  $\delta$  7.37-7.19 (m, 8H), 6.92-6.89 (m, 2H), 6.26 (d,  $J$  = 6.8 Hz, 1H), 5.83 (d,  $J$  = 7.1 Hz, 1H), 4.67-4.58 (m, 2H), 4.23-4.15 (m, 1H), 4.12-4.05 (m, 1H), 3.22-2.90 (m, 4H), 2.20-2.05

(m, 6H), 1.63-1.54 (m, 8 H), 1.28-1.25 (m, 16 H) ppm;  $^{13}\text{C}$  NMR ( $\text{CDCl}_3$ , 75 MHz)  $\delta$  173.3, 170.8, 170.2, 136.8, 135.8, 129.5, 129.2, 128.8, 128.4, 127.2, 127.1, 65.4, 54.1, 53.9, 37.6, 37.4, 36.3, 28.09 (3C), 28.05 (2C), 28.01 (3C), 27.96, 27.91, 25.1 (2C) ppm; ; HRMS (ESI +) for  $\text{C}_{33}\text{H}_{47}\text{N}_2\text{O}_4$  ( $\text{M} + \text{H}^+$ ) calculated mass : 535.3530, found 535.3529.

## SYNTHESIS OF ESTERIFICATION PRECURSORS

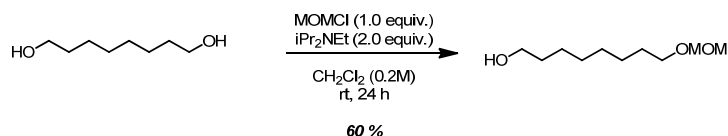

**8-(methoxymethoxy)octanol (S22)** 1,8-octanediol (1.00 g, 6.84 mmol, 1.00 equiv.) was dissolved in  $\text{CH}_2\text{Cl}_2$  (34 mL).  $\text{iPr}_2\text{NEt}$  (2.38 mL, 13.7 mmol, 2.00 equiv.) was added followed by MOMCl (0.52 mL, 6.8 mmol, 1.0 equiv.). The reaction mixture was stirred at room temperature for 24 h and was subsequently quenched by the addition of a saturated solution of  $\text{NH}_4\text{Cl}$  (25 mL). Extraction with  $\text{CH}_2\text{Cl}_2$  (2 x 30 mL) was performed and the combined organic layers were washed with water (30 mL) and brine (30 mL) and dried over  $\text{Na}_2\text{SO}_4$ . The organic phase was concentrated under reduced pressure and flash chromatography (20 % EtOAc in hexanes) was performed to afford the product as a colorless oil (775 mg, 60 %).  $^1\text{H}$  NMR (400 MHz,  $\text{CDCl}_3$ )  $\delta$  4.61 (s, 2H), 3.62 (t,  $J$ = 6.6 Hz, 2H), 3.51 (t,  $J$ = 6.6 Hz, 2H), 3.35 (s, 3H), 1.75 (br s, 1H (OH)), 1.70-1.50 (m, 4H), 1.35-1.25 (m, 8H) ppm;  $^{13}\text{C}$  NMR (100 MHz,  $\text{CDCl}_3$ )  $\delta$  96.3, 67.8, 62.9, 55.0, 32.7, 29.6, 29.32, 29.30, 26.1, 25.6 ppm; HRMS (ESI+) for  $\text{C}_{10}\text{H}_{22}\text{O}_3\text{Na}$  [ $\text{M} + \text{Na}$ ] $^+$  calculated 213.1461 found: 213.1469.

## SYNTHESIS OF ESTERS

General procedure A: An open oven-dried sealable tube was charged with the carboxylic acid (1.00 mmol, 1.00 equiv.) and dissolved in toluene (1 mL, 1M).  $\text{Hf}(\text{OTf})_4$  (38 mg, 0.050 mmol, 0.050 equiv.) and the alcohol (1.0 mmol, 1.0 equiv.) were then added to the mixture and the tube was sealed. The reaction mixture was stirred at 110  $^\circ\text{C}$  for 24 h and then cooled down to room temperature. The tube was opened and silica gel (~ 5 mL) was added. The slurry was concentrated under reduced pressure and purified by flash chromatography.

**General procedure B:** An open oven-dried sealable tube was charged with the carboxylic acid (1.00 mmol, 1.00 equiv.), *i*Pr<sub>2</sub>NEt (0.087 mL, 0.50 mmol, 0.5 equiv.) and dissolved toluene (1 mL, 1M). Hf(OTf)<sub>4</sub> (38 mg, 0.050 mmol, 0.050 equiv.) and the alcohol (1.0 mmol, 1.0 equiv.) were then added to the mixture and the tube was sealed. The reaction mixture was stirred at 110 °C for 24 h and then cooled down to room temperature. The tube was opened and silica gel (~ 5 mL) was added. The slurry was concentrated under reduced pressure and purified by flash chromatography.

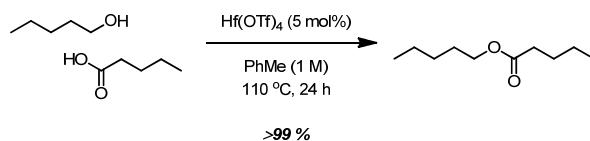

**Pentyl pentanoate (15)** Following general procedure A, flash chromatography (5 % EtOAc in hexanes) afforded the product as a colorless oil (171 mg, >99 %). Spectral data were in accordance with those previously reported in the literature.<sup>16</sup>

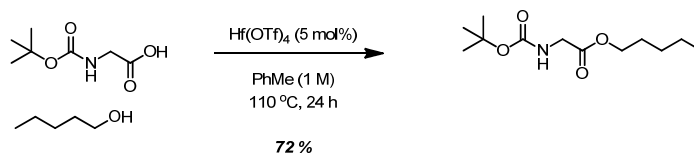

**Pentyl ((*tert*-butoxy)carbonyl)glycinate (16)** Following general procedure A, flash chromatography (15 % EtOAc in hexanes) was performed to afford the product as a colorless oil (176 mg, 72 %). <sup>1</sup>H NMR (400 MHz, CDCl<sub>3</sub>) δ 5.09 (br s, 1H (NH)), 4.11 (t, *J*= 6.7 Hz, 2H), 3.87 (d, *J*= 5.4 Hz, 2H), 1.65-1.57 (m, 2H), 1.44-1.40 (m, 11H), 1.35-1.28 (m, 4H), 0.88 (t, *J*= 6.4 Hz, 3H) ppm; <sup>13</sup>C NMR (100 MHz, CDCl<sub>3</sub>) δ 170.4, 155.7, 79.8, 65.4, 42.3, 28.2, 28.1, 27.8, 22.2, 13.8 ppm; HRMS (ESI<sup>+</sup>) for C<sub>12</sub>H<sub>23</sub>NO<sub>4</sub>Na [M + Na]<sup>+</sup> calculated 268.1519 found: 268.1525.

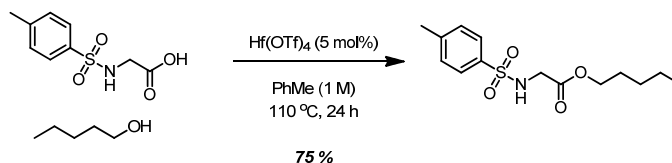

**Pentyl N-(*p*-tosyl)glycinate (17)** Following general procedure A, flash chromatography (10 % EtOAc in hexanes) was performed to afford the product as a white solid (224 mg, 75 %). <sup>1</sup>H NMR (400 MHz, CDCl<sub>3</sub>) δ 7.75 (d, *J*= 8.1 Hz, 2H), 7.30 (d, *J*= 8.1 Hz, 2H), 5.23 (br s, 1H (NH)), 4.01 (t, *J*= 6.9 Hz, 2H), 3.77 (d, *J*= 5.5 Hz, 2H), 2.42 (s, 3H), 1.55-1.50 (m, 2H), 1.30-1.22 (m, 4H), 0.88 (t, *J*= 6.8 Hz, 3H) ppm; <sup>13</sup>C NMR (100 MHz,

CDCl<sub>3</sub>)  $\delta$  168.8, 143.7, 136.2, 129.7, 127.2, 65.9, 44.1, 28.0, 27.7, 22.1, 21.4, 13.8 ppm; HRMS (ESI<sup>+</sup>) for C<sub>14</sub>H<sub>22</sub>NO<sub>4</sub>S [M + H]<sup>+</sup> calculated 300.1264 found: 300.1278.

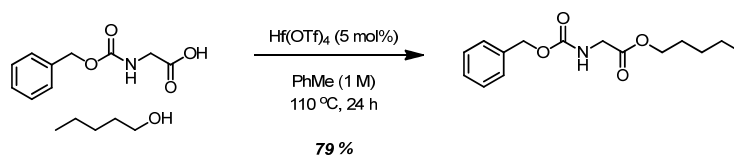

**Pentyl ((benzyloxy)carbonyl)glycinate (18)** Following general procedure A, flash chromatography (10 % EtOAc in hexanes) was performed to afford the product as a colorless oil (220 mg, 79 %). <sup>1</sup>H NMR (400 MHz, CDCl<sub>3</sub>)  $\delta$  7.33-7.28 (m, 5H), 5.64 (br s, 1H (NH)), 5.10 (s, 2H), 4.11 (t, *J* = 6.8 Hz), 3.92 (d, *J* = 7.0 Hz, 2H), 1.65-1.55 (m, 2H), 1.35-1.25 (m, 4H), 0.90 (t, *J* = 6.9 Hz, 3H) ppm; <sup>13</sup>C NMR (100 MHz, CDCl<sub>3</sub>)  $\delta$  170.0, 156.2, 136.1, 128.2, 127.85, 127.79, 66.7, 65.3, 42.5, 27.9, 27.7, 22.0, 13.7 ppm; C<sub>15</sub>H<sub>22</sub>NO<sub>4</sub> [M + H]<sup>+</sup> calculated 280.1543 found: 280.1551.

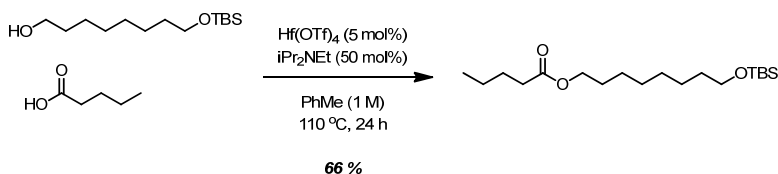

**8-(*tert*-Butyldimethylsilyloxy)octyl pentanoate (19)** Following general procedure B, flash chromatography (5 % EtOAc in hexanes) afforded the product as a colorless oil (178 mg, 66 %). <sup>1</sup>H NMR (400 MHz, CDCl<sub>3</sub>)  $\delta$  4.06 (t, *J* = 6.7 Hz, 2H), 3.61 (t, *J* = 6.5 Hz, 2H), 2.31 (t, *J* = 7.3 Hz, 2H), 1.64-1.60 (m, 2H), 1.55-1.48 (m, 2H), 1.40-1.30 (m, 8H), 0.94-0.90 (m, 12H), 0.05 (s, 6H) ppm; <sup>13</sup>C NMR (100 MHz, CDCl<sub>3</sub>)  $\delta$  173.9, 64.3, 63.2, 34.1, 32.8, 29.3, 29.2, 28.6, 27.1, 26.0, 25.9, 25.7, 22.2, 18.3, 13.7, -5.3 ppm; HRMS (ESI<sup>+</sup>) for C<sub>19</sub>H<sub>41</sub>O<sub>3</sub>Si [M + H]<sup>+</sup> calculated 345.2820 found: 345.2831.

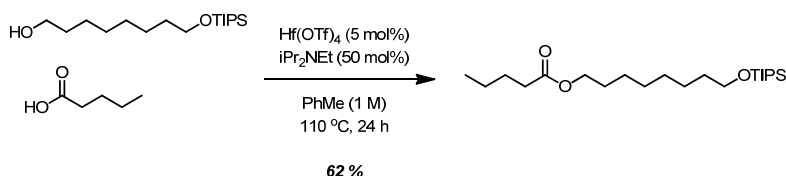

**8-(Triisopropylsilyloxy)octyl pentanoate (20)** Following general procedure B, flash chromatography (5 % EtOAc in hexanes) afforded the product as a colorless oil (217 mg, 62 %).  $^1\text{H}$  NMR (400 MHz,  $\text{CDCl}_3$ )  $\delta$  4.06 (t,  $J$ = 6.8 Hz, 2H), 3.68 (t,  $J$ = 6.7 Hz, 2H), 2.30 (t,  $J$ = 7.4 Hz, 2H), 1.65-1.50 (m, 6H), 1.35-1.25 (m, 10H), 1.09-1.06 (m, 21 H), 0.92 (t,  $J$ = 7.3 Hz, 3H) ppm;  $^{13}\text{C}$  NMR (100 MHz,  $\text{CDCl}_3$ )  $\delta$  173.9, 64.3, 63.4, 34.1, 33.0, 29.3, 29.2, 28.6, 27.1, 25.9, 25.7, 22.2, 17.9, 13.6, 12.0 ppm; HRMS (ESI+) for  $\text{C}_{22}\text{H}_{46}\text{O}_3\text{SiNa}$   $[\text{M} + \text{Na}]^+$  calculated 409.3108 found: 409.3128.

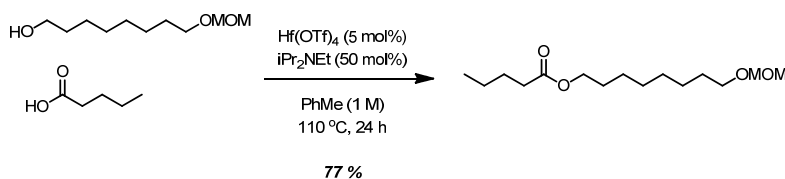

**8-(Methoxymethoxy)octyl pentanoate (21)** Following general procedure B, flash chromatography (10 % EtOAc in hexanes) afforded the product as a colorless oil (210 mg, 77 %).  $^1\text{H}$  NMR (400 MHz,  $\text{CDCl}_3$ )  $\delta$  4.58 (s, 2H), 4.02 (t,  $J$ = 6.8 Hz, 2H), 3.48 (t,  $J$ = 6.6 Hz, 2H), 3.32 (s, 3H), 2.26 (t,  $J$ = 7.5 Hz, 2H), 1.60-1.50 (m, 6H), 1.35-1.25 (m, 10H), 0.88 (t,  $J$ = 7.3 Hz, 3H) ppm;  $^{13}\text{C}$  NMR (100 MHz,  $\text{CDCl}_3$ )  $\delta$  173.8, 96.3, 67.7, 64.2, 54.9, 34.0, 29.6, 29.2, 29.1, 28.5, 27.0, 26.0, 25.8, 22.2, 13.6 ppm; HRMS (ESI+) for  $\text{C}_{15}\text{H}_{30}\text{O}_4\text{Na}$   $[\text{M} + \text{Na}]^+$  calculated 297.2036 found: 297.2047.

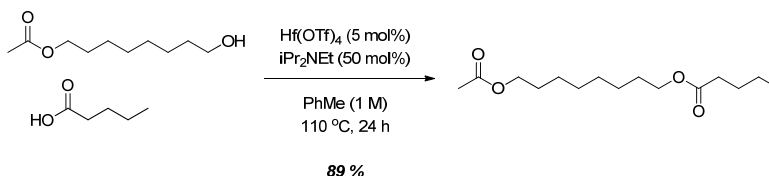

**8-acetoxyoctyl pentanoate (22)** Following general procedure B, flash chromatography (5 % EtOAc in hexanes) afforded the product as a colorless oil (129 mg, 89 %).  $^1\text{H}$  NMR (400 MHz,  $\text{CDCl}_3$ )  $\delta$  4.035 (t,  $J$ = 6.7 Hz, 2H), 4.030 (t,  $J$ = 6.8 Hz, 2H), 2.28 (t,  $J$ = 7.4 Hz, 2H), 2.02 (s, 3H), 1.63-1.55 (m, 6H), 1.35-1.25 (m, 10H), 0.89 (t,  $J$ = 7.3 Hz, 3H) ppm;  $^{13}\text{C}$  NMR (100 MHz,  $\text{CDCl}_3$ )  $\delta$  173.9, 171.1, 64.5, 64.2, 34.0, 29.03, 29.02, 28.53, 28.49, 27.0, 25.8, 25.7, 22.2, 20.9, 13.6 ppm; HRMS (ESI+) for  $\text{C}_{15}\text{H}_{29}\text{O}_4$  ( $\text{M} + \text{H}^+$ ) calculated mass: 273.2060, found 273.2059.

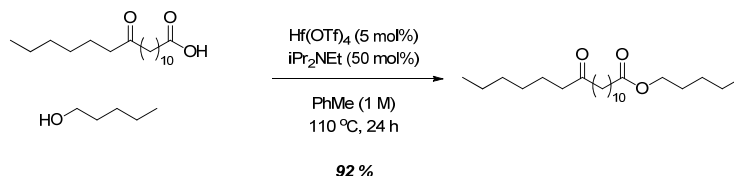

**Pentyl 12-oxooctadecanoate (23)** Following general procedure A, flash chromatography (5 % EtOAc in hexanes) afforded the product as a colorless solid (170 mg, 89 %). <sup>1</sup>H NMR (400 MHz, CDCl<sub>3</sub>) δ 4.04 (t, *J* = 6.6 Hz, 2H), 2.38-2.34 (m, 4H), 2.27 (t, *J* = 7.3 Hz, 2H), 1.70-1.50 (m, 8 H), 1.45-1.20 (m, 22H), 0.90-0.84 (m, 6H) ppm; <sup>13</sup>C NMR (100 MHz, CDCl<sub>3</sub>) δ 211.6, 173.9, 64.3, 42.7, 34.3, 31.6, 29.3 (3C), 29.2 (2C), 29.1, 28.9, 28.3, 28.0, 24.9, 23.81, 28.78, 22.4, 22.3, 13.95, 13.89 ppm; HRMS (ESI+) for C<sub>23</sub>H<sub>45</sub>O<sub>3</sub> (*M* + H<sup>+</sup>) calculated mass: 369.3363, found 369.3369.

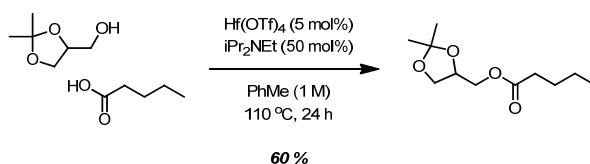

**(2,2-Dimethyl-1,3-dioxolan-4-yl)methyl pentanoate (24)** Following general procedure B, flash chromatography (15 % EtOAc in hexanes) afforded the product as a colorless oil (130 mg, 61 %). <sup>1</sup>H NMR (400 MHz, CDCl<sub>3</sub>) δ 4.35-4.27 (m, 1H), 4.19-4.05 (m, 3H), 3.74 (dd, *J* = 8.4 Hz, 6.2 Hz, 1H), 2.35 (t, *J* = 7.4 Hz, 2H), 1.66-1.58 (m, 2H), 1.43 (s, 3H), 1.40-1.30 (m, 5H), 0.91 (t, *J* = 7.3 Hz, 3H) ppm; <sup>13</sup>C NMR (100 MHz, CDCl<sub>3</sub>) δ 173.6, 109.8, 73.6, 66.3, 64.5, 33.8, 26.9, 29.6, 25.4, 22.2, 13.6 ppm; HRMS (ESI+) for C<sub>11</sub>H<sub>20</sub>O<sub>4</sub>Na [*M* + Na]<sup>+</sup> calculated 239.1254 found: 239.1255.

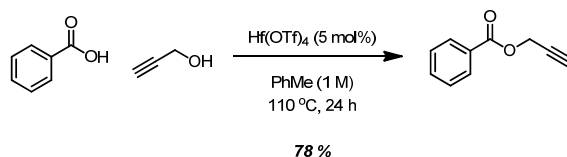

**2-propargyl benzoate (25)** Following general procedure A, flash chromatography (10 % EtOAc in hexanes) afforded the product as a colorless oil (124 mg, 78 %). Spectral data were in accordance with those previously reported in the literature.<sup>17</sup>

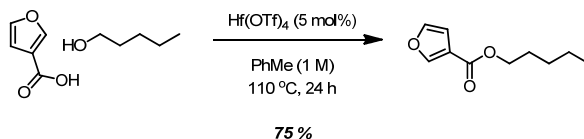

**Pentyl furan-3-carboxylate (26)** Following general procedure A, flash chromatography (10 % EtOAc in hexanes) afforded the product as a colorless oil (144 mg, 75 %). <sup>1</sup>H NMR (400 MHz, CDCl<sub>3</sub>) δ 7.99 (s, 1H), 7.40 (d, *J* = 1.2 Hz, 1H), 6.73 (d, *J* = 1.2 Hz, 1H), 4.23 (t,

$J = 6.8$  Hz, 2H), 1.70-1.65 (m, 2H), 1.40-1.30 (m, 4H), 0.90 (t,  $J = 7.0$  Hz, 3H) ppm;  $^{13}\text{C}$  NMR (100 MHz,  $\text{CDCl}_3$ )  $\delta$  163.1, 147.5, 143.6, 119.6, 109.8, 64.5, 28.3, 28.1, 22.3, 13.9 ppm; HRMS (ESI+) for  $\text{C}_{10}\text{H}_{15}\text{O}_3[\text{M} + \text{H}]^+$  calculated 183.1016 found: 183.1015.

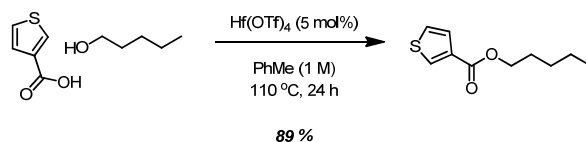

**Pentyl thiophen-3-carboxylate (27)** Following general procedure A, flash chromatography (10 % EtOAc in hexanes) afforded the product as a colorless oil (177 mg, 89 %).  $^1\text{H}$  NMR (400 MHz,  $\text{CDCl}_3$ )  $\delta$  8.10 (dd,  $J = 3.1, 1.2$  Hz, 1H), 7.53 (dd,  $J = 5.0, 1.2$  Hz, 1H), 7.29 (dd,  $J = 5.0, 3.1$  Hz, 1H), 4.27 (t,  $J = 6.7$  Hz, 2H), 1.77-1.73 (m, 2H), 1.45-1.30 (m, 4H), 0.93 (t,  $J = 7.0$  Hz, 3H) ppm;  $^{13}\text{C}$  NMR (100 MHz,  $\text{CDCl}_3$ )  $\delta$  162.8, 134.0, 132.4, 127.9, 125.8, 64.8, 28.4, 28.1, 22.3, 13.9 ppm; HRMS (ESI+) for  $\text{C}_{10}\text{H}_{15}\text{O}_2\text{S}[\text{M} + \text{H}]^+$  calculated 199.0787 found: 199.0790.

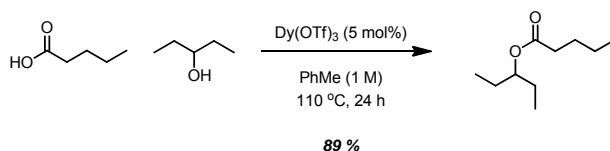

**Pentan-3-yl pentanoate (36)** Following general procedure A using  $\text{Dy}(\text{OTf})_3$  (30.5 mg, 0.050 mmol, 0.05 equiv.), flash chromatography (5 % EtOAc in hexanes) afforded the product as a colorless oil (103 mg, 60 %). Spectral data were in accordance with those previously reported in the literature.<sup>18</sup>

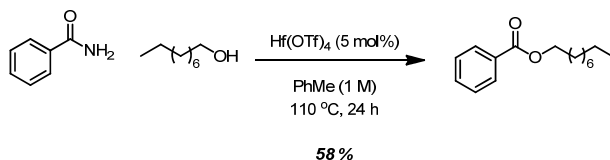

**Nonyl benzoate (37)** An open oven-dried sealable tube was charged with the benzamide acid (121 mg mL, 1.00 mmol, 1.00 equiv.) and dissolved in toluene (1 mL, 1M).  $\text{Hf}(\text{OTf})_4$  (38 mg, 0.050 mmol, 0.050 equiv.) and nonanol (0.174 mL, 1.0 mmol, 1.0 equiv.) were then added to the mixture and the tube was sealed. The reaction mixture was stirred at 110 °C for 24 h and then cooled down to room temperature. The tube was opened and silica gel (~ 5 mL) was added. The slurry was concentrated under reduced pressure and purified by flash chromatography (5% EtOAc in hexanes) to afford the product as a colorless oil (145 mg, 58 %). Spectral data were in accordance with those previously reported in the literature.<sup>19</sup>



## TABULAR DATA

Table S1: Optimization of a Lewis acid catalyzed macrolactonization process.

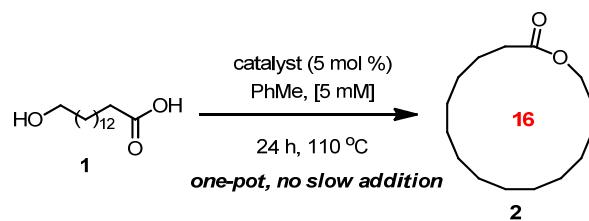

| Catalyst | Yield <b>2</b><br>(%) | Catalyst | Yield <b>2</b><br>(%) |
|----------|-----------------------|----------|-----------------------|
|----------|-----------------------|----------|-----------------------|

|    |                                     |    |    |                                      |    |
|----|-------------------------------------|----|----|--------------------------------------|----|
| 1  | AlCl <sub>3</sub>                   | 0  | 16 | ZrCl <sub>4</sub> (THF) <sub>2</sub> | 13 |
| 2  | MgBr <sub>2</sub> ·OEt <sub>2</sub> | 0  | 17 | Zr(tfacac) <sub>3</sub>              | 0  |
| 3  | BF <sub>3</sub> ·OEt <sub>2</sub>   | 36 | 18 | CuBr <sub>2</sub>                    | 0  |
| 4  | B(OH) <sub>3</sub>                  | 0  | 19 | CuCl <sub>2</sub>                    | 0  |
| 5  | TiCp <sub>2</sub> Cl <sub>2</sub>   | 0  | 20 | Cu(OAc) <sub>2</sub>                 | 25 |
| 6  | TiCl <sub>4</sub>                   | 0  | 21 | Cu(OTf) <sub>2</sub>                 | 54 |
| 7  | Fe(acac) <sub>3</sub>               | 0  | 22 | Sc(OTf) <sub>3</sub>                 | 45 |
| 8  | FeCl <sub>3</sub>                   | 0  | 23 | Sm(OTf) <sub>3</sub>                 | 21 |
| 9  | Fe(OTf) <sub>2</sub>                | 0  | 24 | Dy(OTf) <sub>3</sub>                 | 13 |
| 10 | Fe(OTf) <sub>3</sub>                | 0  | 25 | Yb(OTf) <sub>3</sub>                 | 38 |
| 11 | Pd(TFA) <sub>3</sub>                | 0  | 26 | Hf(OTf) <sub>4</sub>                 | 83 |
| 12 | Ni(acac) <sub>2</sub>               | 0  | 26 | HfCl <sub>4</sub> (THF) <sub>2</sub> | 17 |
| 13 | AgOTf                               | 22 | 27 | Hf( <i>On</i> -Bu) <sub>4</sub>      | 12 |
| 14 | Zn(OTf) <sub>2</sub>                | 0  |    |                                      |    |
| 15 | Co(OAc) <sub>2</sub>                | 0  |    |                                      |    |

<sup>a</sup> Isolated yields following silica gel chromatography. Remaining mass balance is unreacted **1** unless otherwise noted. <sup>b</sup> No trace of **1** was isolated. <sup>c</sup> Polymerization of **1** is observed. <sup>d</sup> Lower catalyst loadings provided lower yields. When 2.5 mol % Hf(OTf)<sub>4</sub> was used 72 % of **2** and 27 % re-isolated **1** were obtained.

Table S2: Macrolactonization in the presence of excess water.

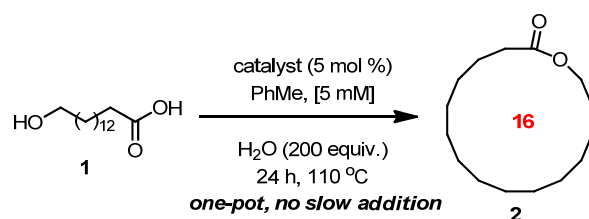

|   | Catalyst                             | Yield <b>2</b> (%) <sup>a</sup> |    | Catalyst                             | Yield <b>2</b> (%) <sup>a</sup> |
|---|--------------------------------------|---------------------------------|----|--------------------------------------|---------------------------------|
| 1 | BF <sub>3</sub> ·OEt <sub>2</sub>    | 17                              | 7  | Sm(OTf) <sub>3</sub>                 | 0                               |
| 2 | AgOTf                                | 4                               | 8  | Yb(OTf) <sub>3</sub>                 | 0                               |
| 3 | Cu(OAc) <sub>2</sub>                 | 0                               | 9  | HfCl <sub>4</sub> (THF) <sub>2</sub> | 0                               |
| 4 | ZrCl <sub>4</sub> (THF) <sub>2</sub> | 13                              | 10 | Hf(On-Bu) <sub>4</sub>               | 0                               |
| 5 | Cu(OTf) <sub>2</sub>                 | <5                              | 11 | Hf(OTf) <sub>4</sub>                 | 83 <sup>b</sup>                 |
| 6 | Sc(OTf) <sub>3</sub>                 | 0                               | 12 | Dy(OTf) <sub>3</sub>                 | 0                               |

<sup>a</sup> Isolated yields following silica gel chromatography. <sup>b</sup> Increasing the water content to 400 equiv. resulted in a decrease in yield to 23 % of **2**.

Table S3: Ring-opening (hydrolysis) of macrolactone **2** under Lewis acid conditions.

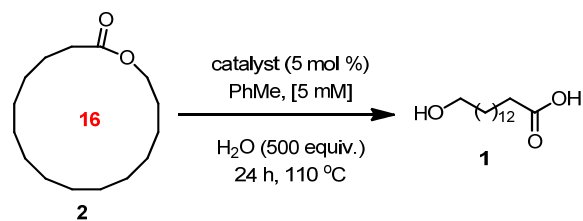

|   | Catalyst                             | <b>2</b> (%) <sup>a</sup> |    | Catalyst                             | <b>2</b> (%) <sup>a</sup> |
|---|--------------------------------------|---------------------------|----|--------------------------------------|---------------------------|
| 1 | BF <sub>3</sub> ·OEt <sub>2</sub>    | 99                        | 7  | Sm(OTf) <sub>3</sub>                 | 96                        |
| 2 | AgOTf                                | 83                        | 8  | Yb(OTf) <sub>3</sub>                 | 83                        |
| 3 | Cu(OAc) <sub>2</sub>                 | 67                        | 9  | HfCl <sub>4</sub> (THF) <sub>2</sub> | 50                        |
| 4 | ZrCl <sub>4</sub> (THF) <sub>2</sub> | 99                        | 10 | Hf(On-Bu) <sub>4</sub>               | 99                        |
| 5 | Cu(OTf) <sub>2</sub>                 | 67                        | 11 | Hf(OTf) <sub>4</sub>                 | 88 <sup>b</sup>           |
| 6 | Sc(OTf) <sub>3</sub>                 | 58                        | 12 | Dy(OTf) <sub>3</sub>                 | 99                        |

<sup>a</sup> Yields of recovered **2** following silica gel chromatography. <sup>b</sup> The re-isolated yield of **2** remained high (>80 %) even when using 1000 equiv. of added H<sub>2</sub>O.

## COMPETITION EXPERIMENTS

Competition experiments confirmed selectivity for primary alcohols over secondary alcohols and amines.

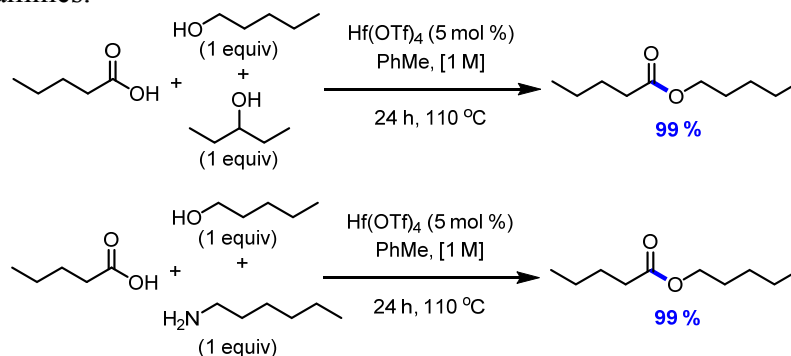

Forcing conditions with secondary or tertiary alcohols did not afford the desired esters.

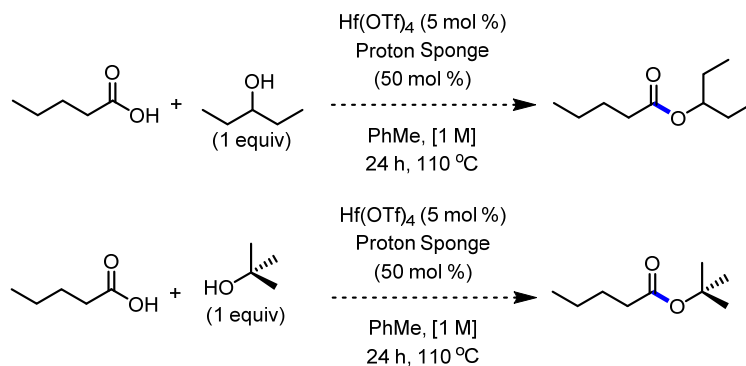

# SPECTRAL DATA

## Compound S1

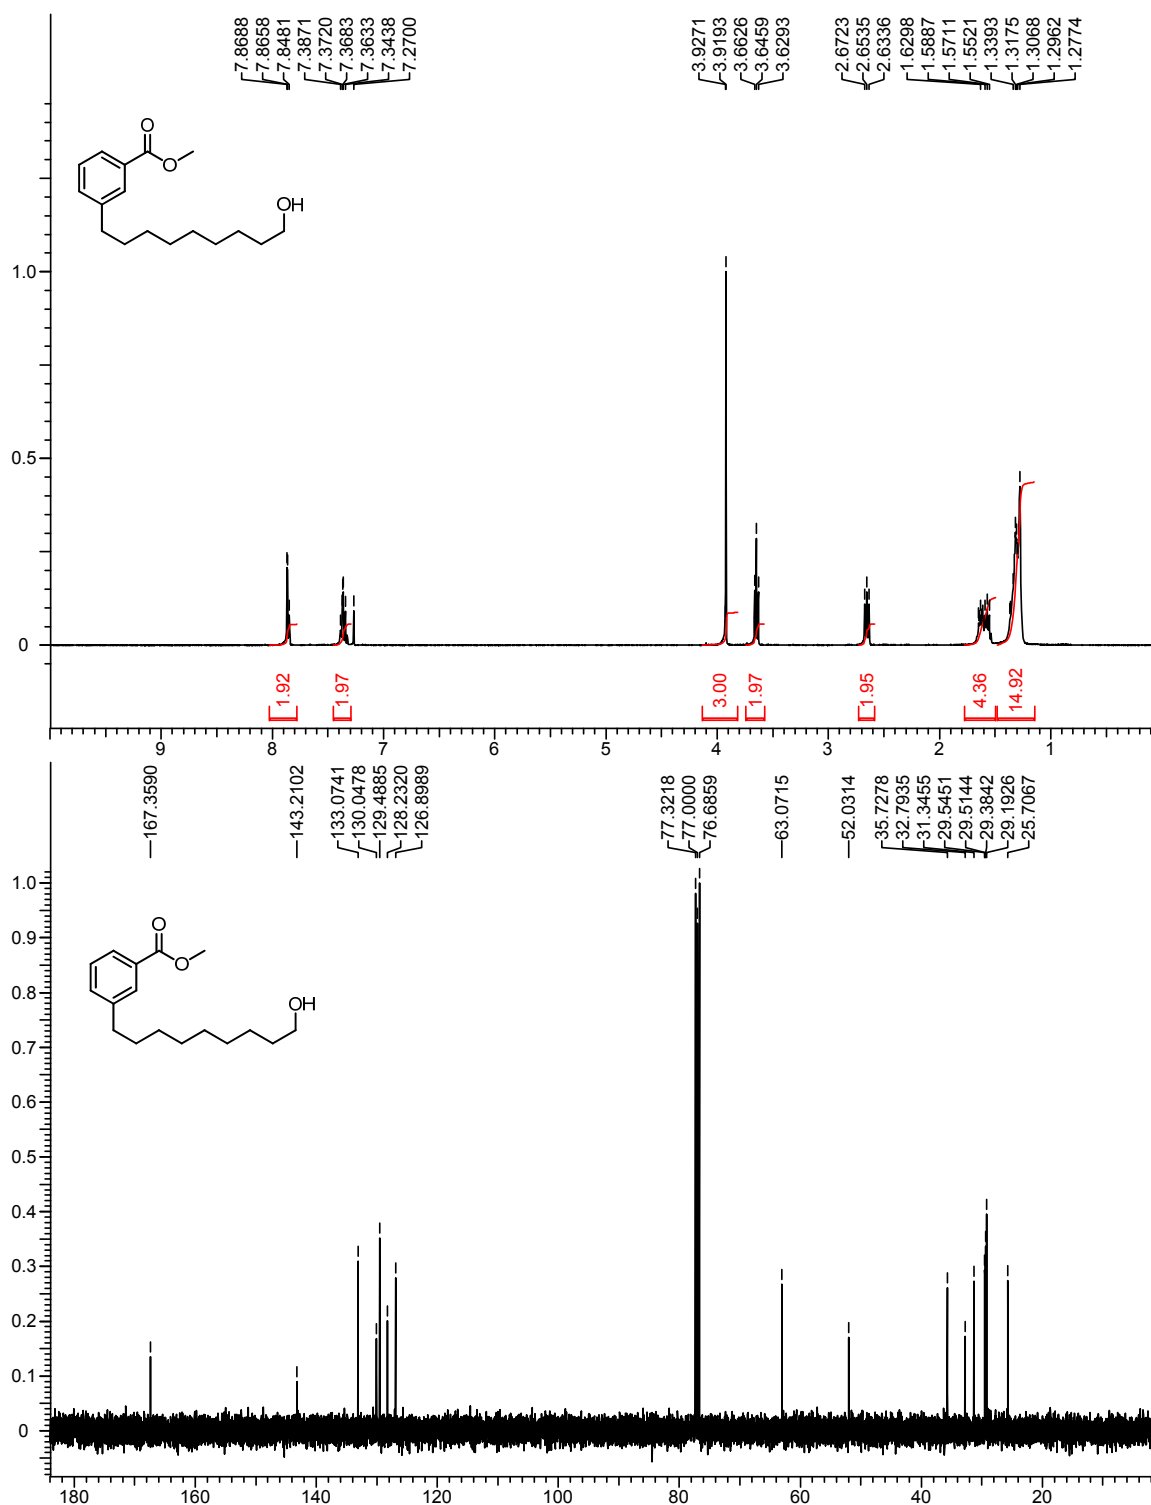

# Compound S2

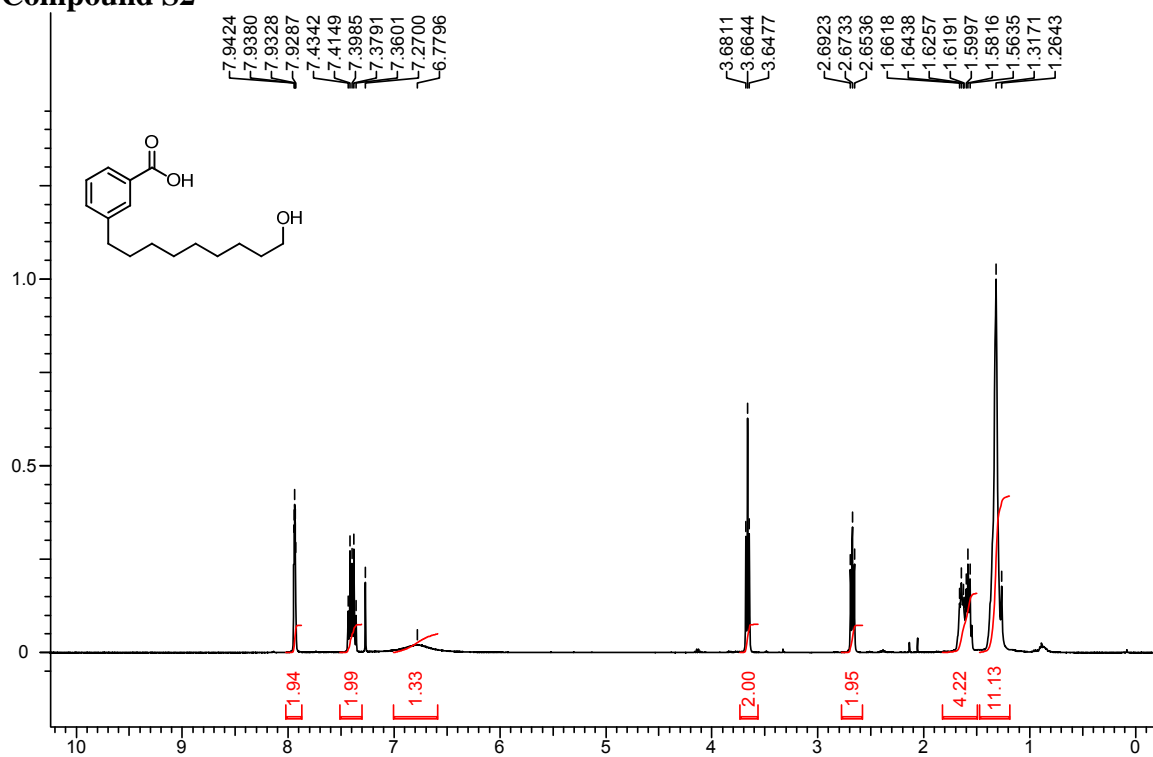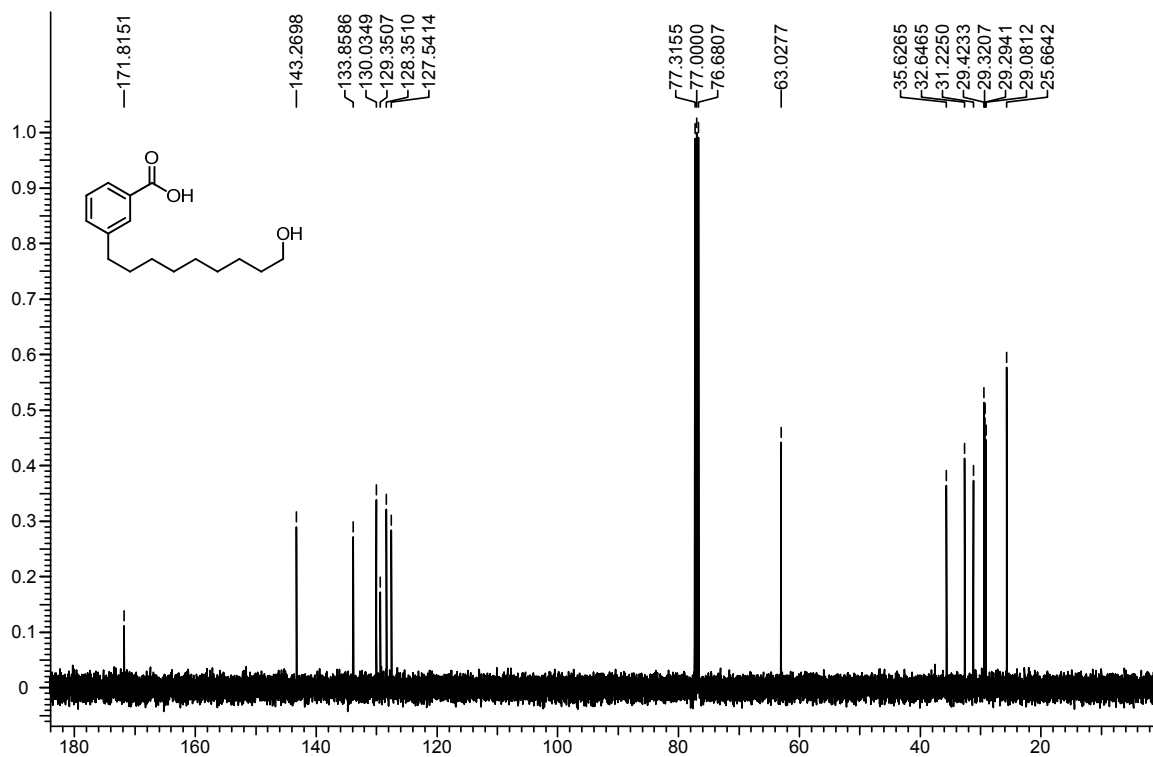

# Compound S3

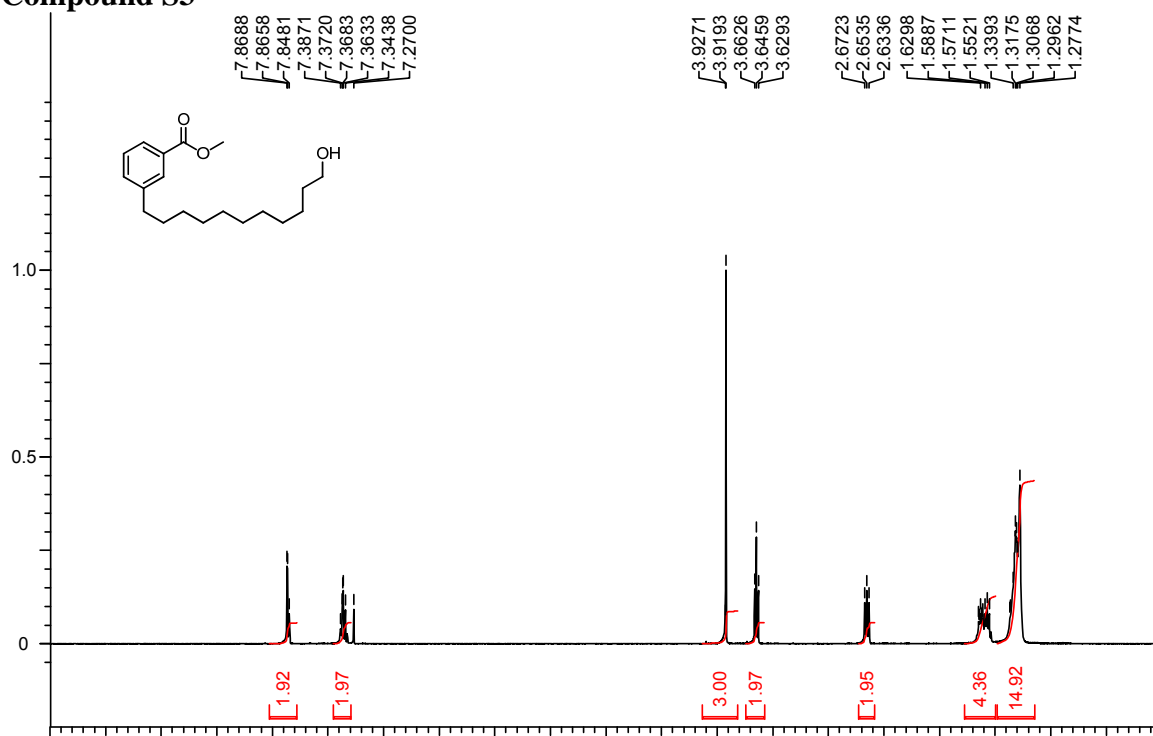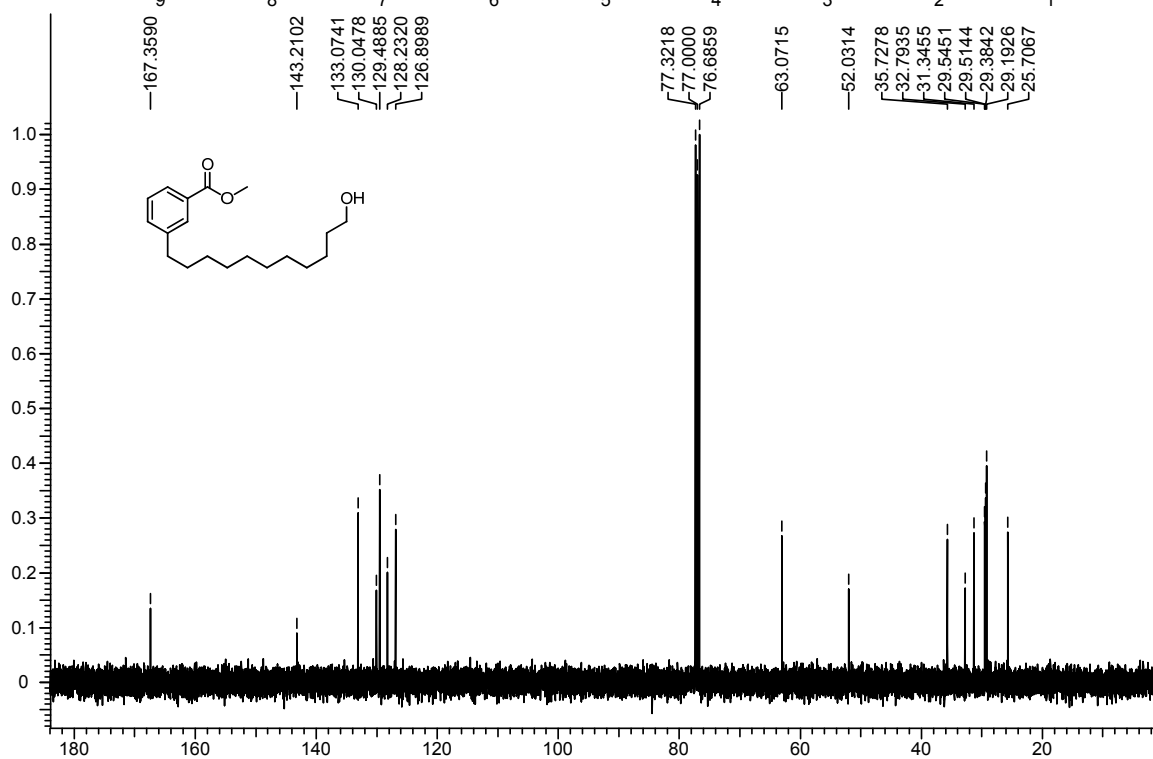

# Compound S4

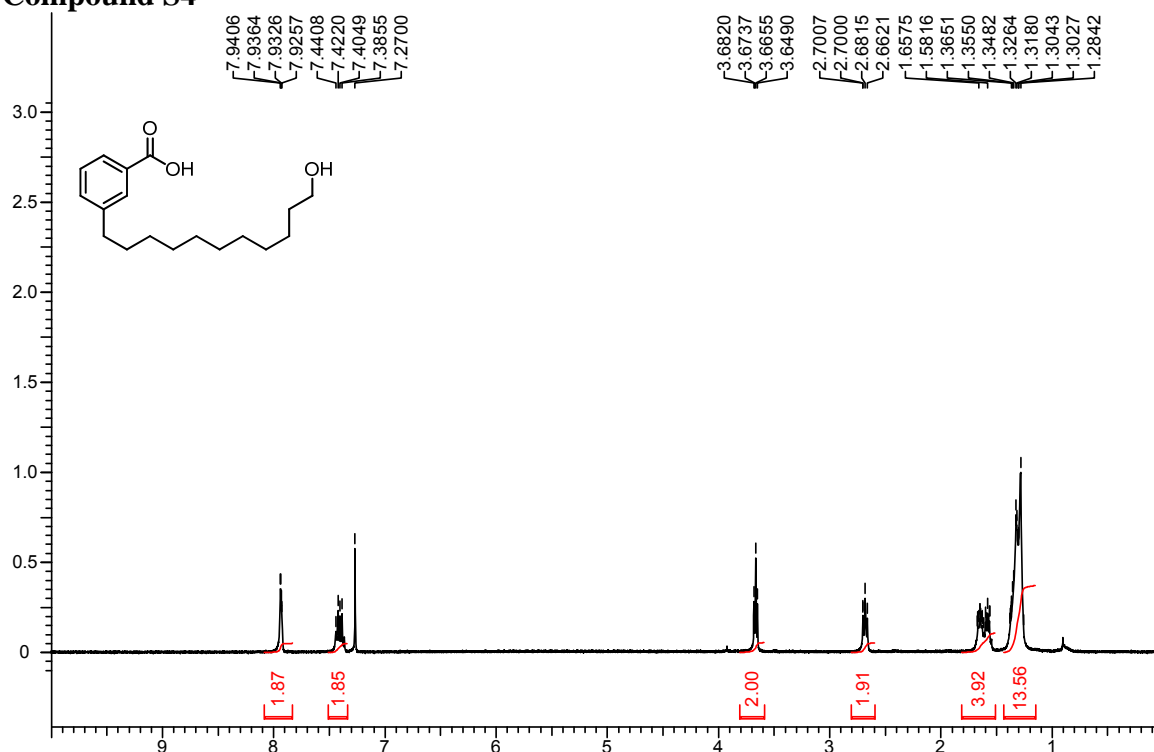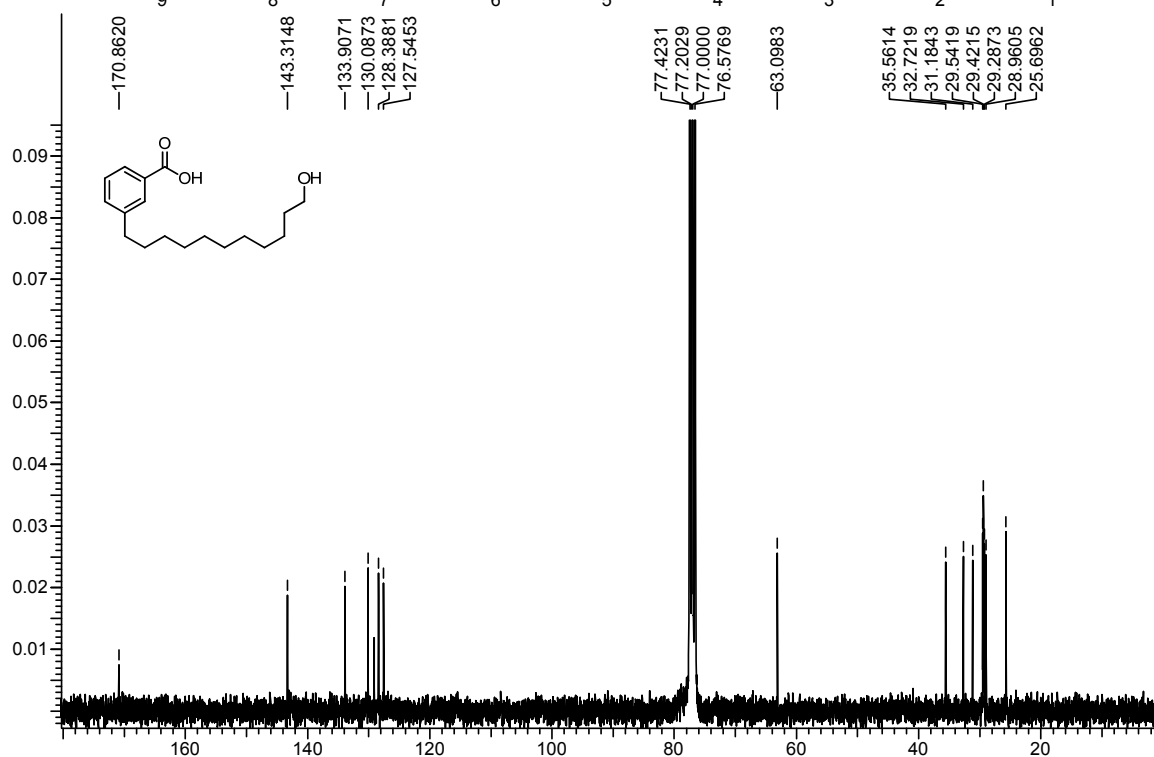



# Compound S5

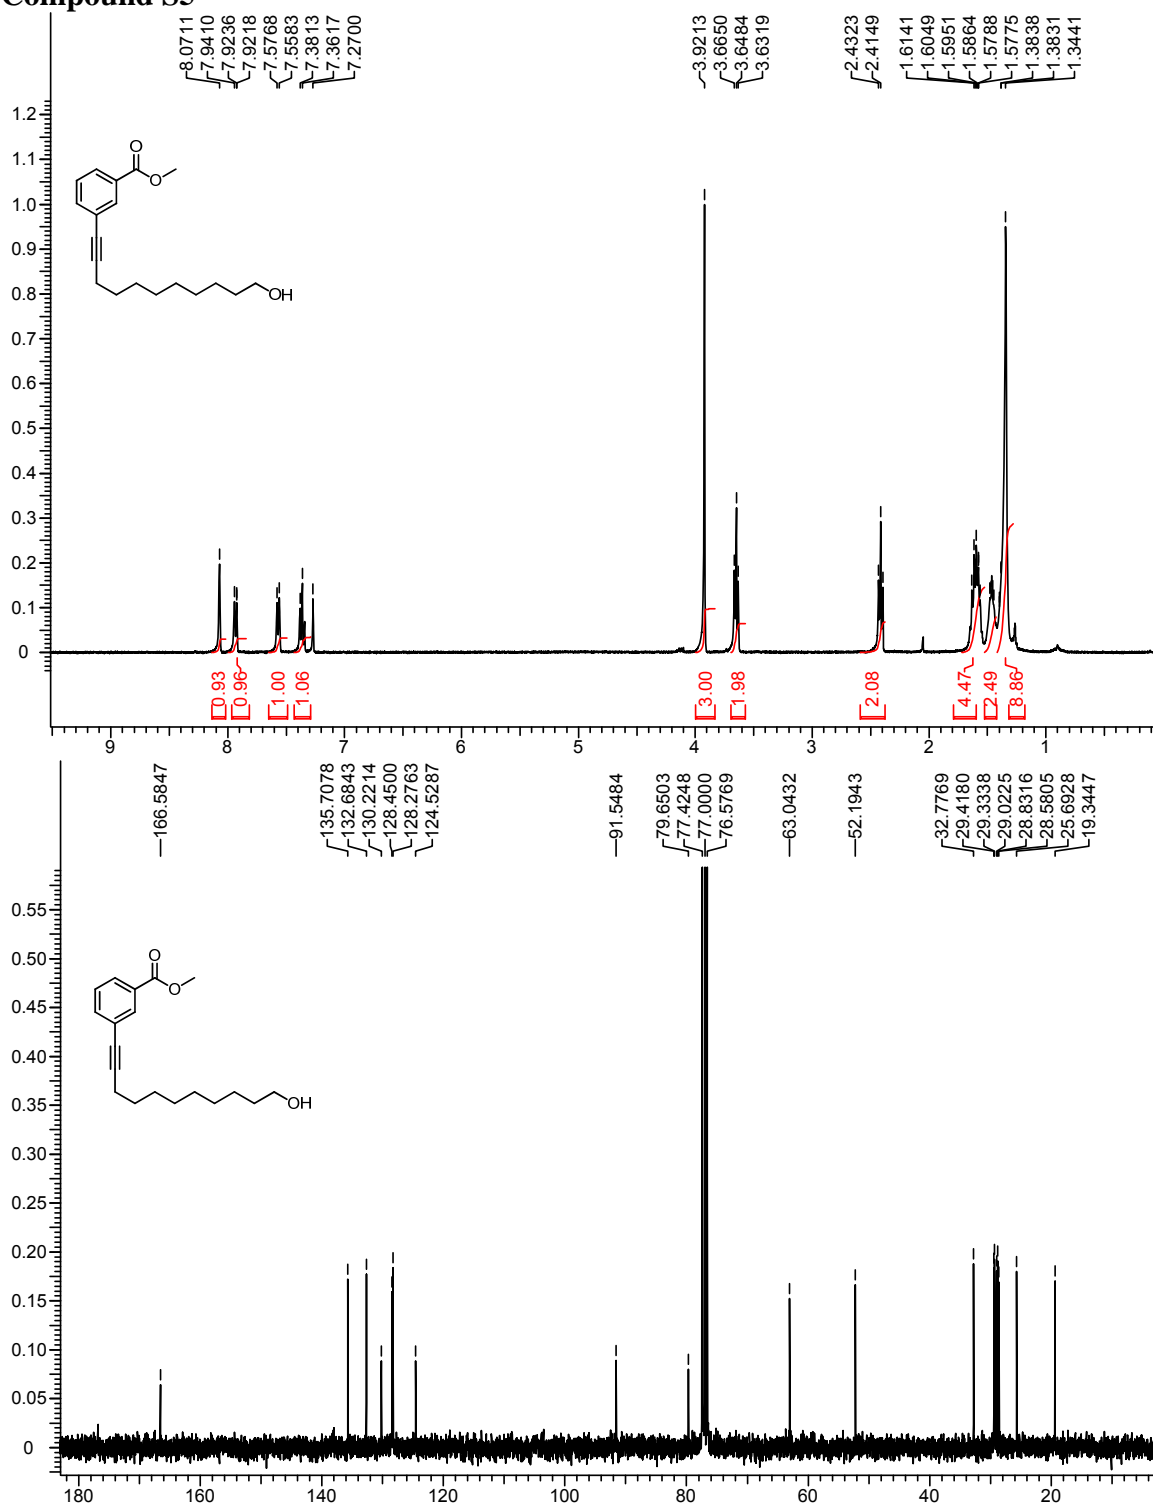

# Compound S6

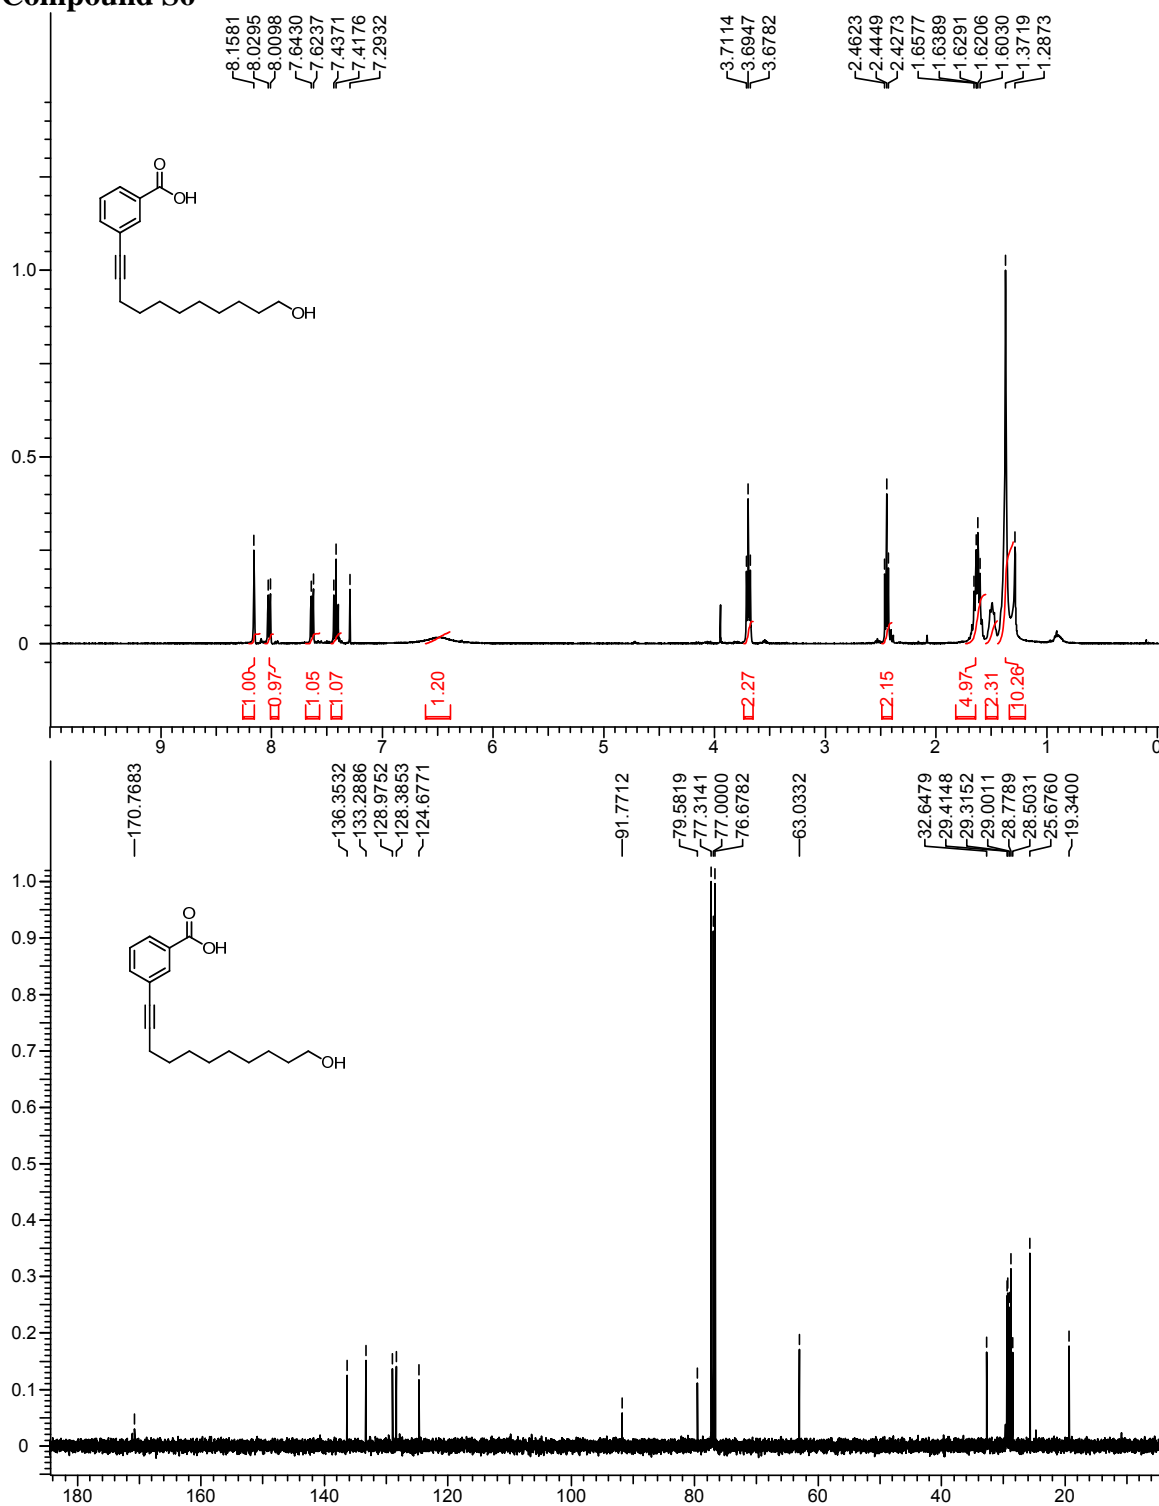

# Compound S7

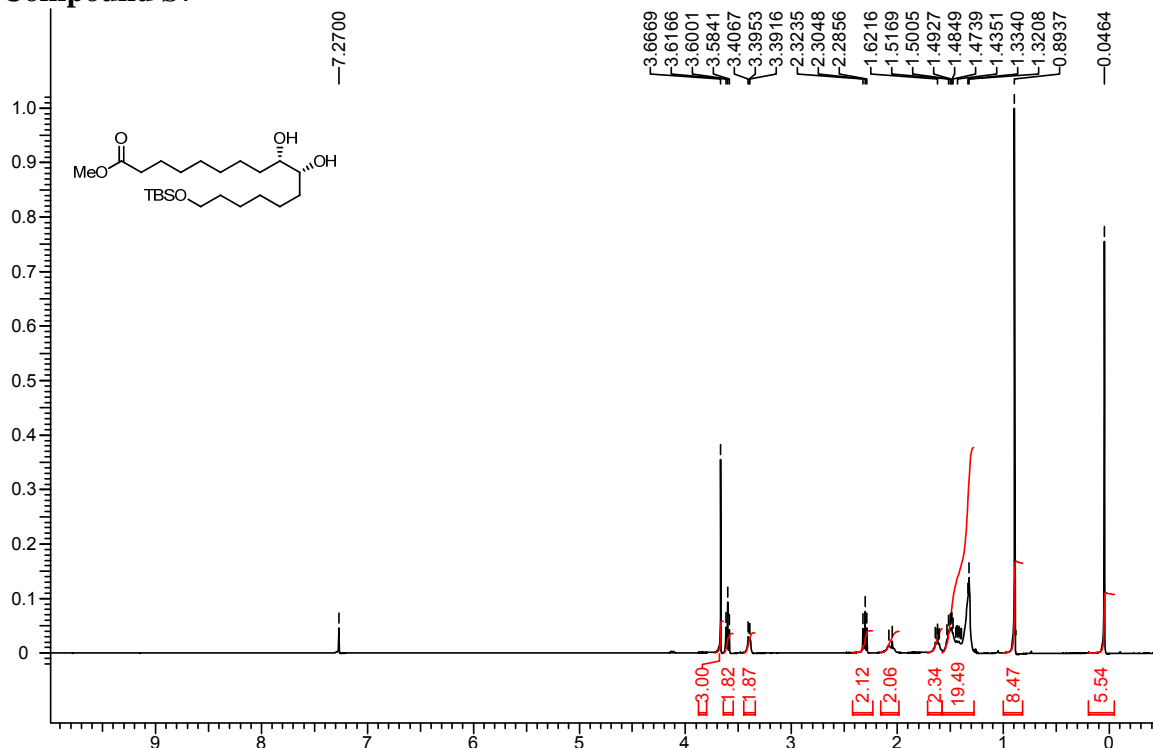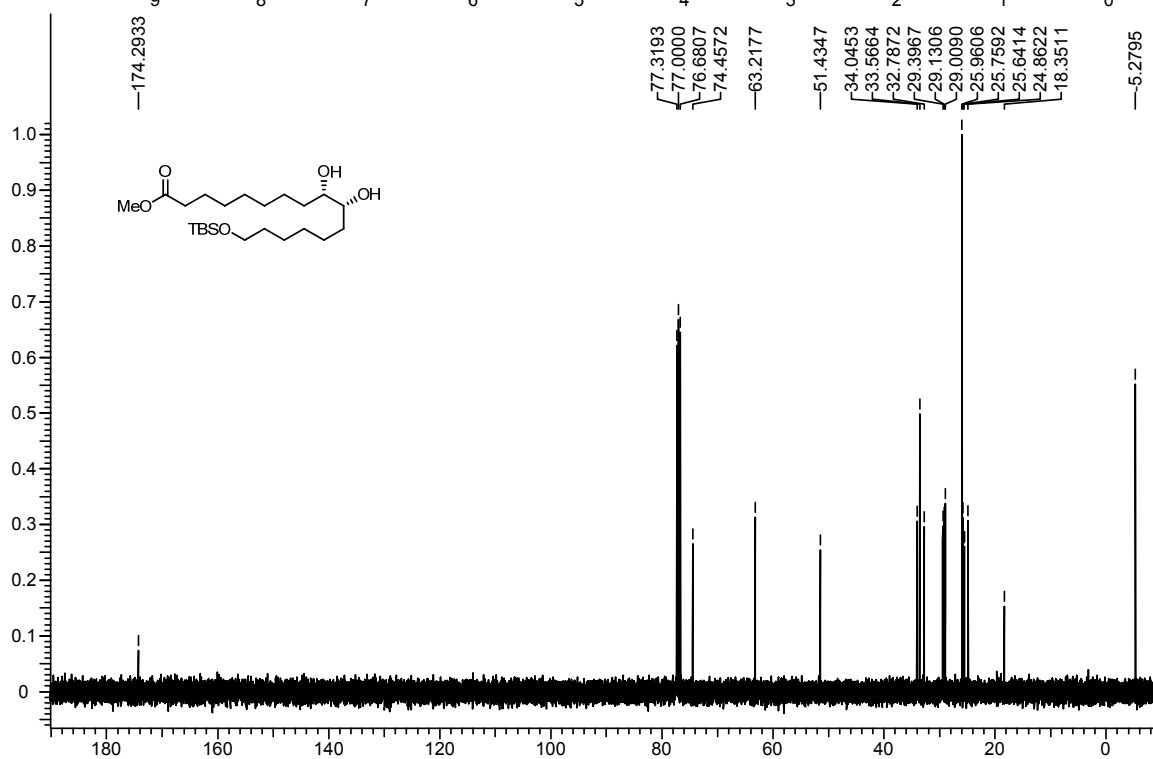

# Compound S8

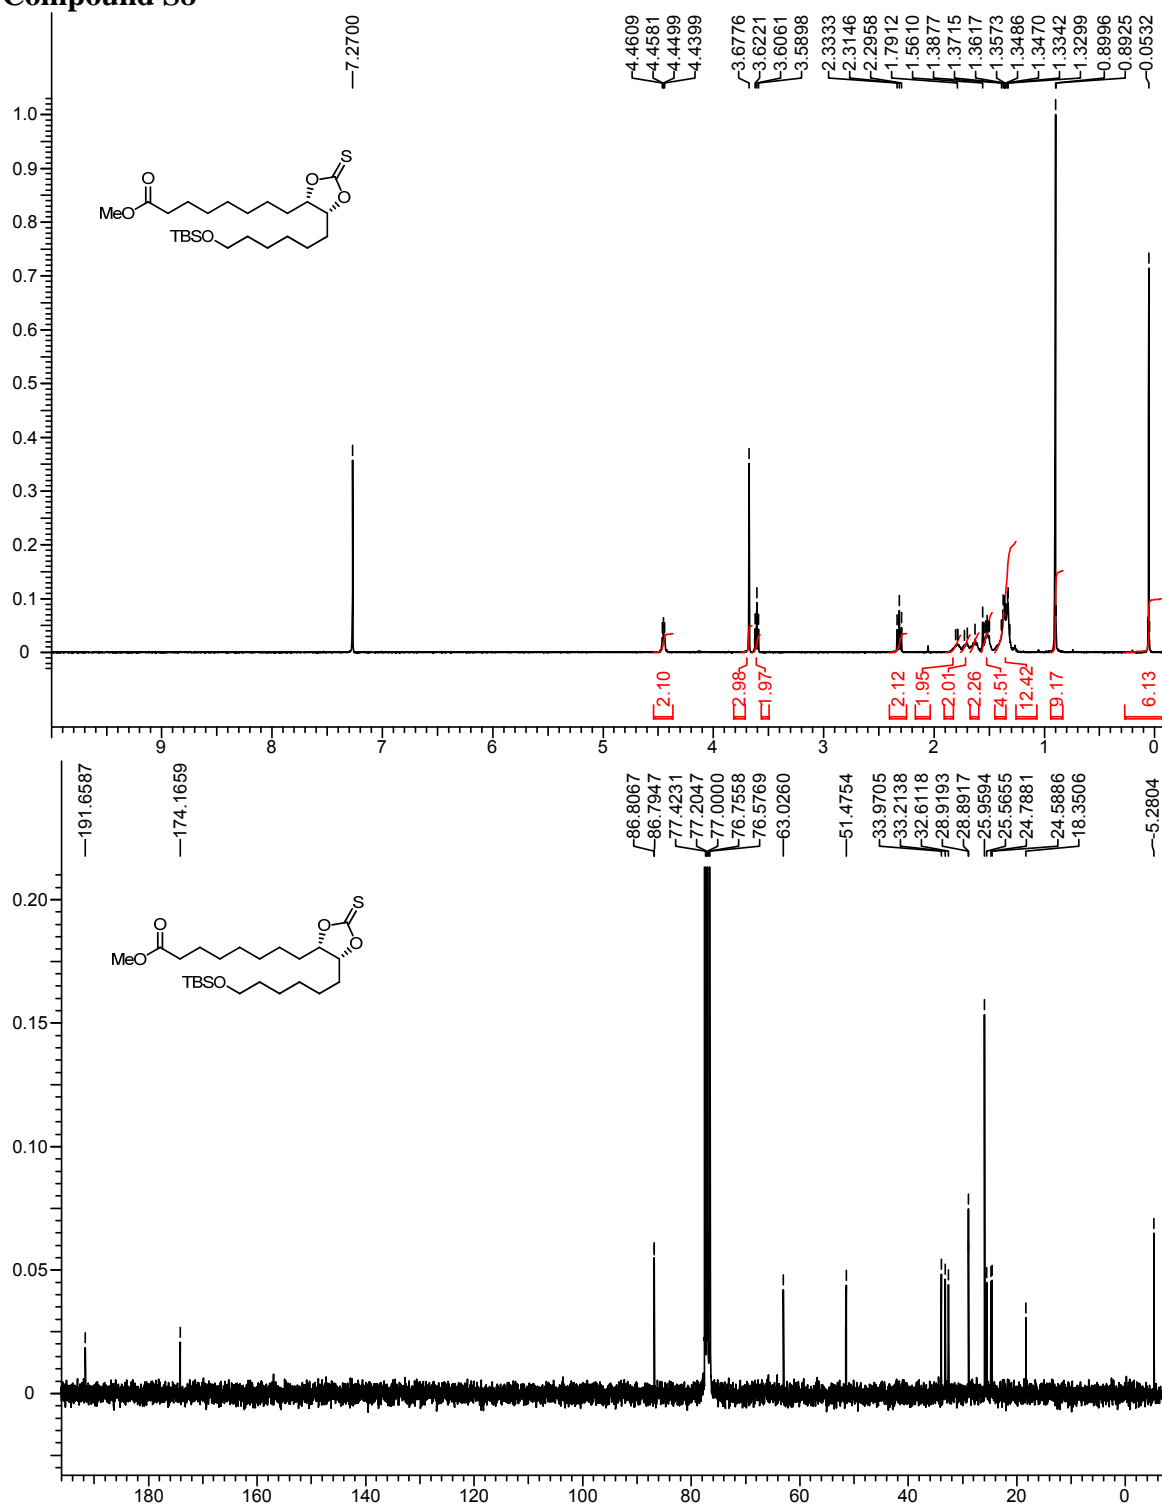

# Compound S9

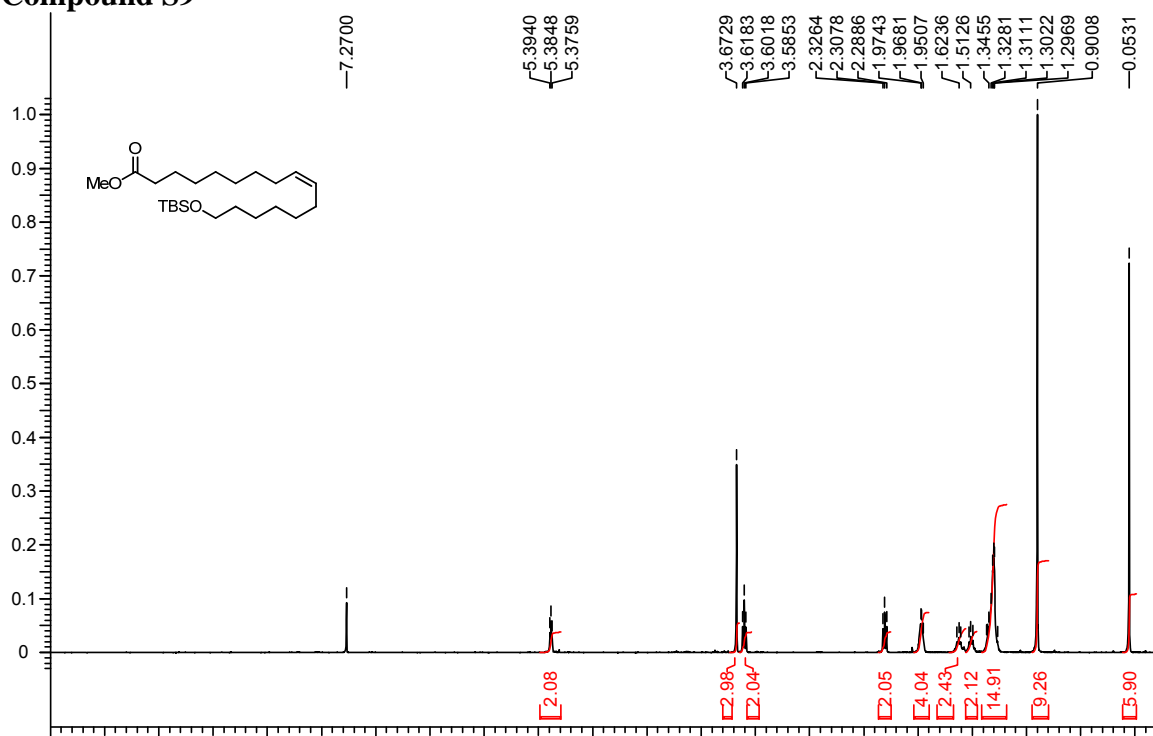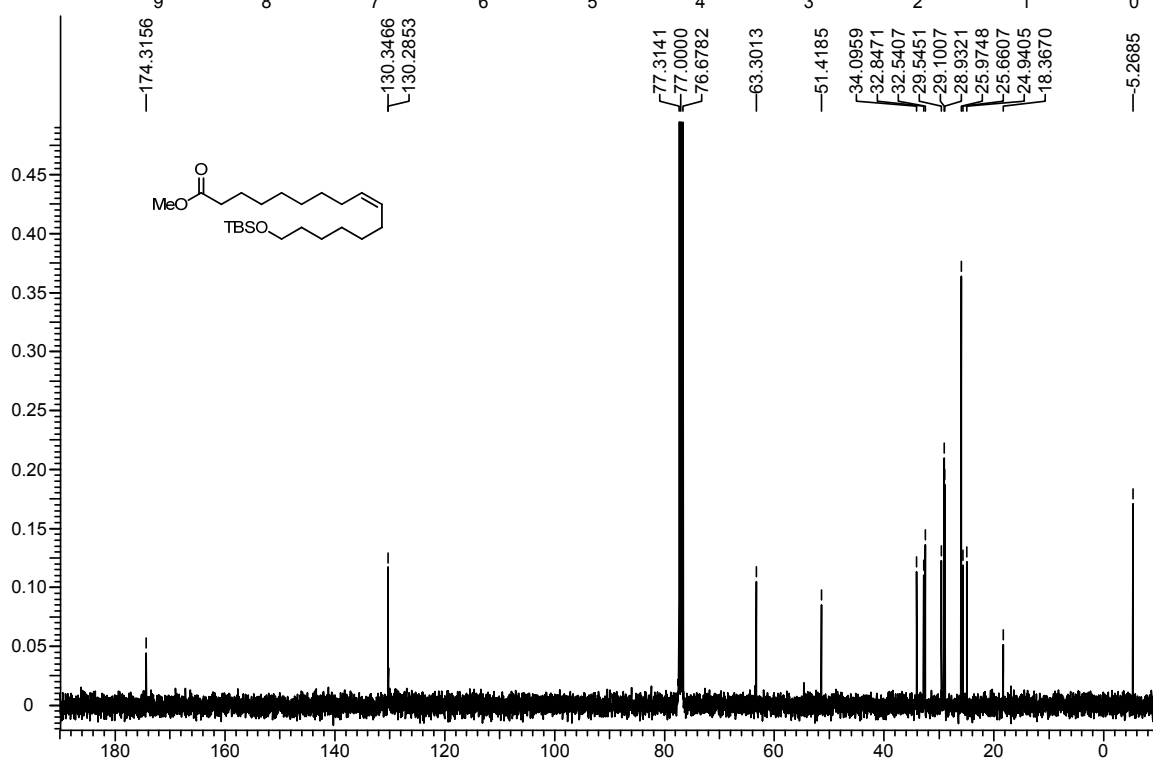

# Compound S10

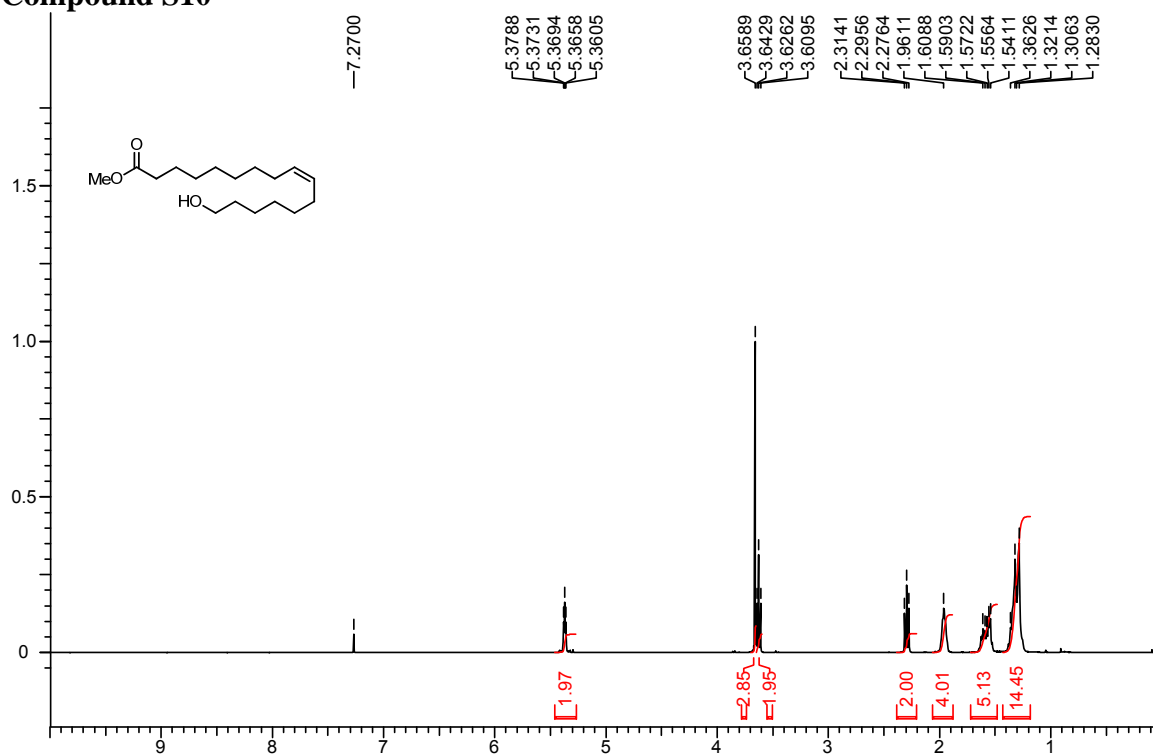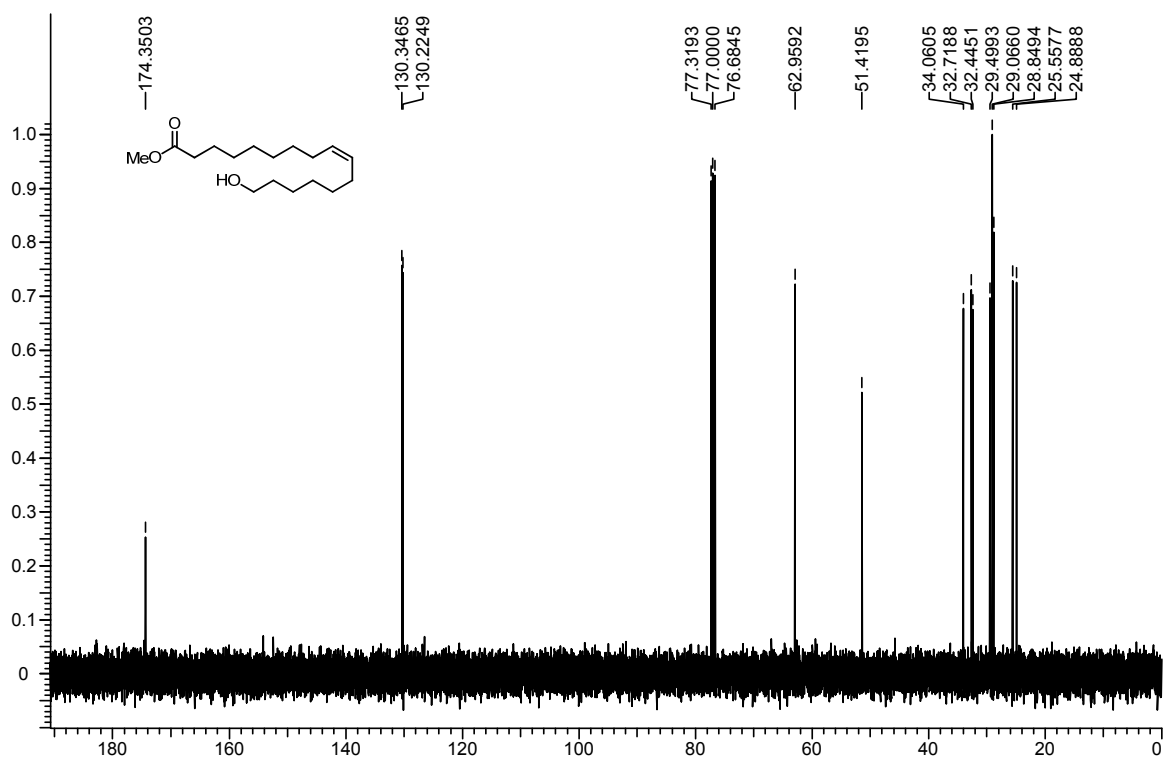

# Compound S11

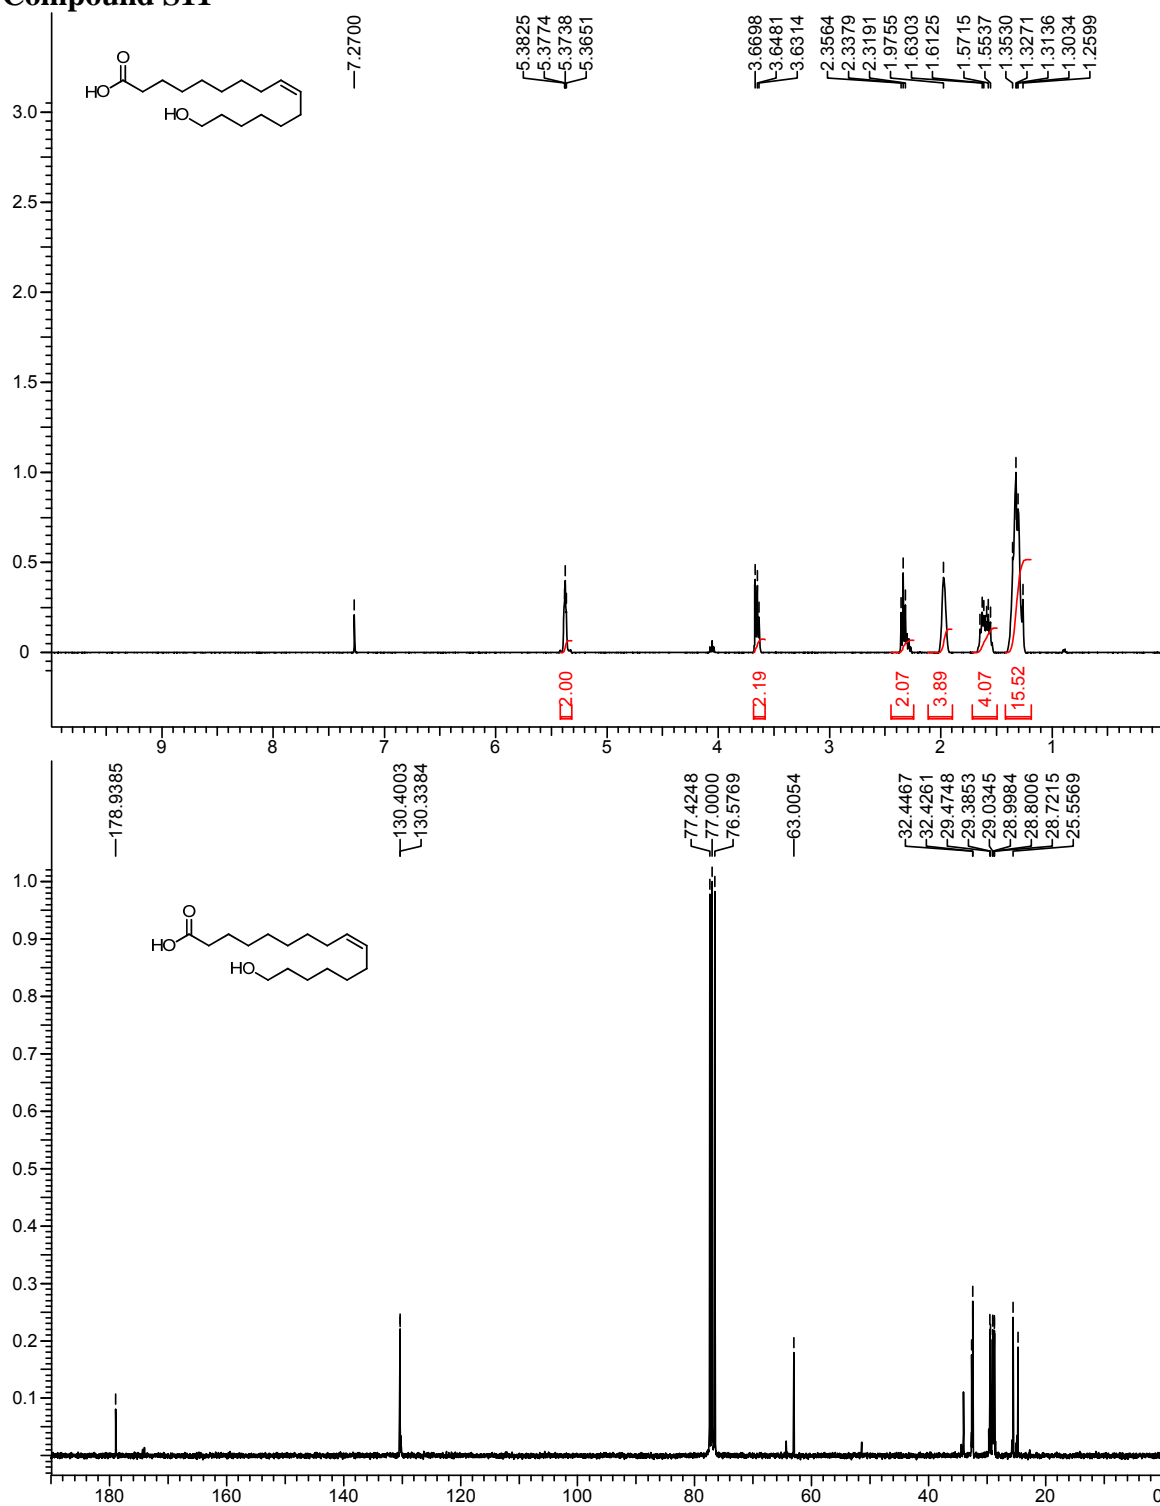

# Compound S12

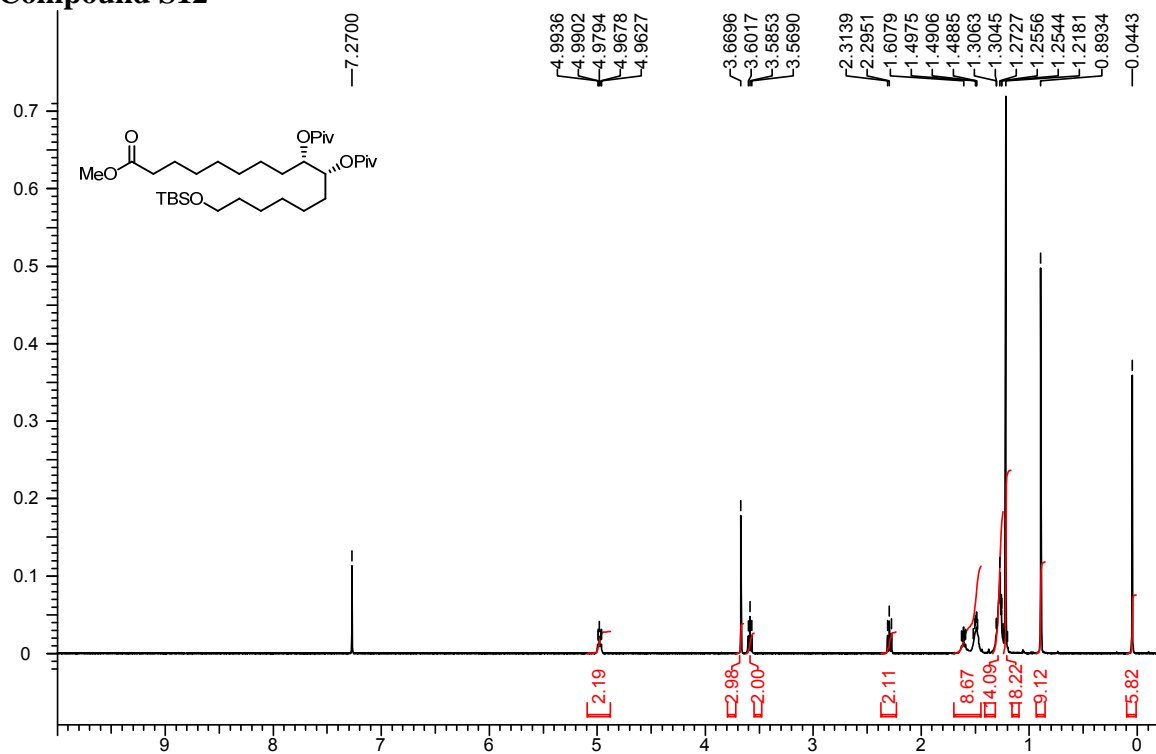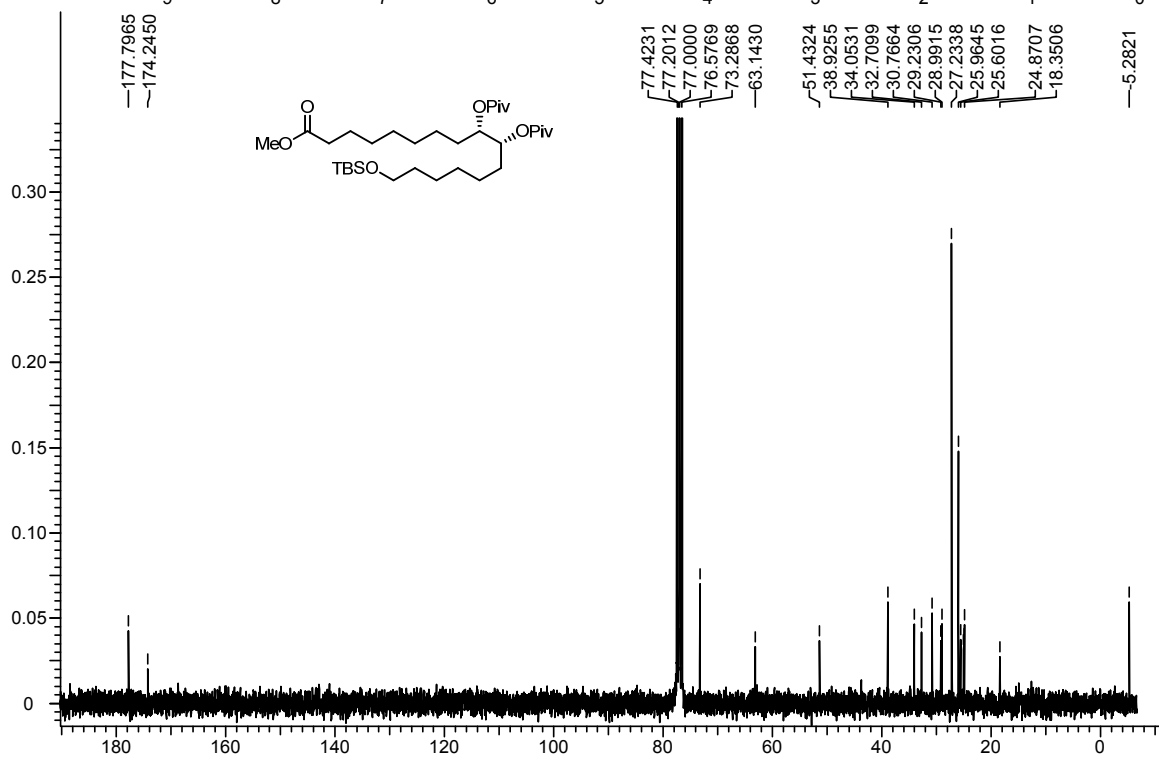



# Compound S13

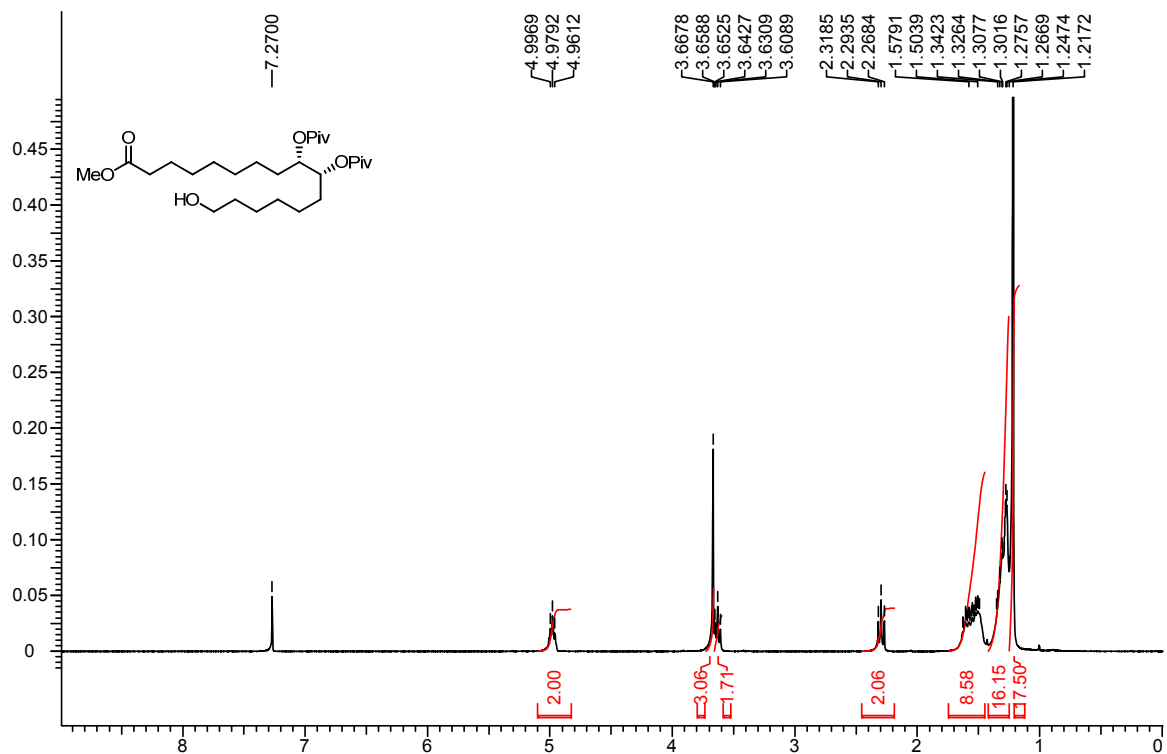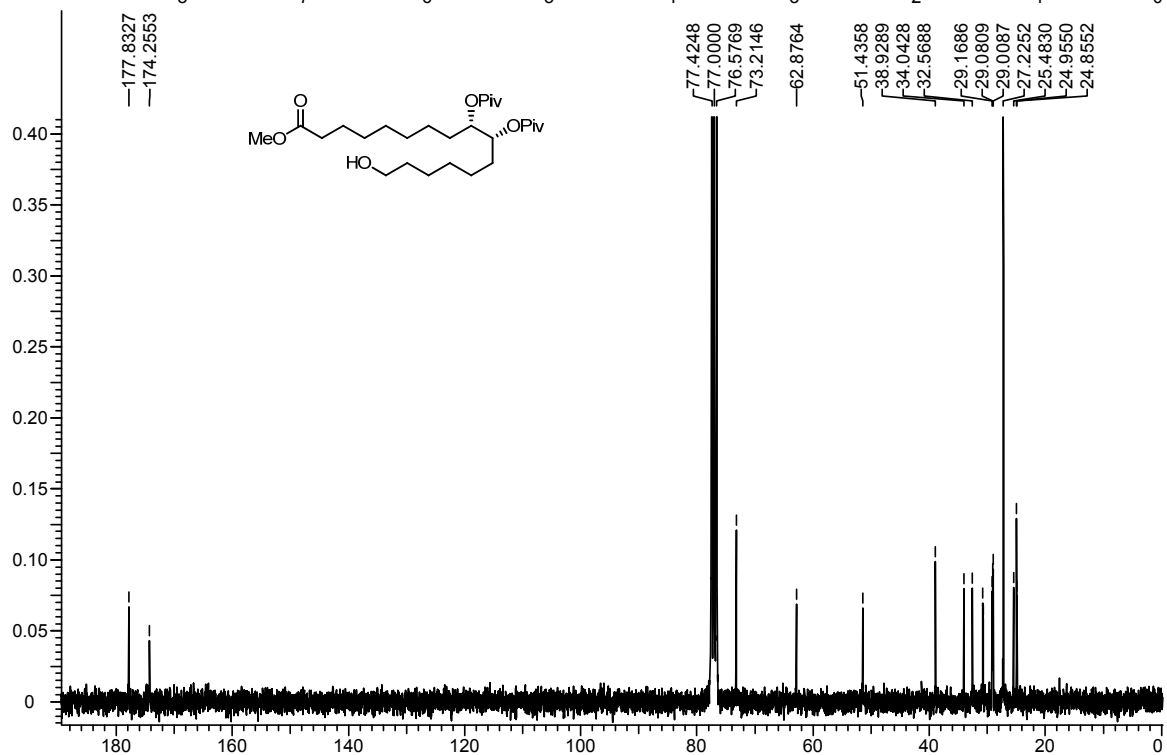

# Compound S14

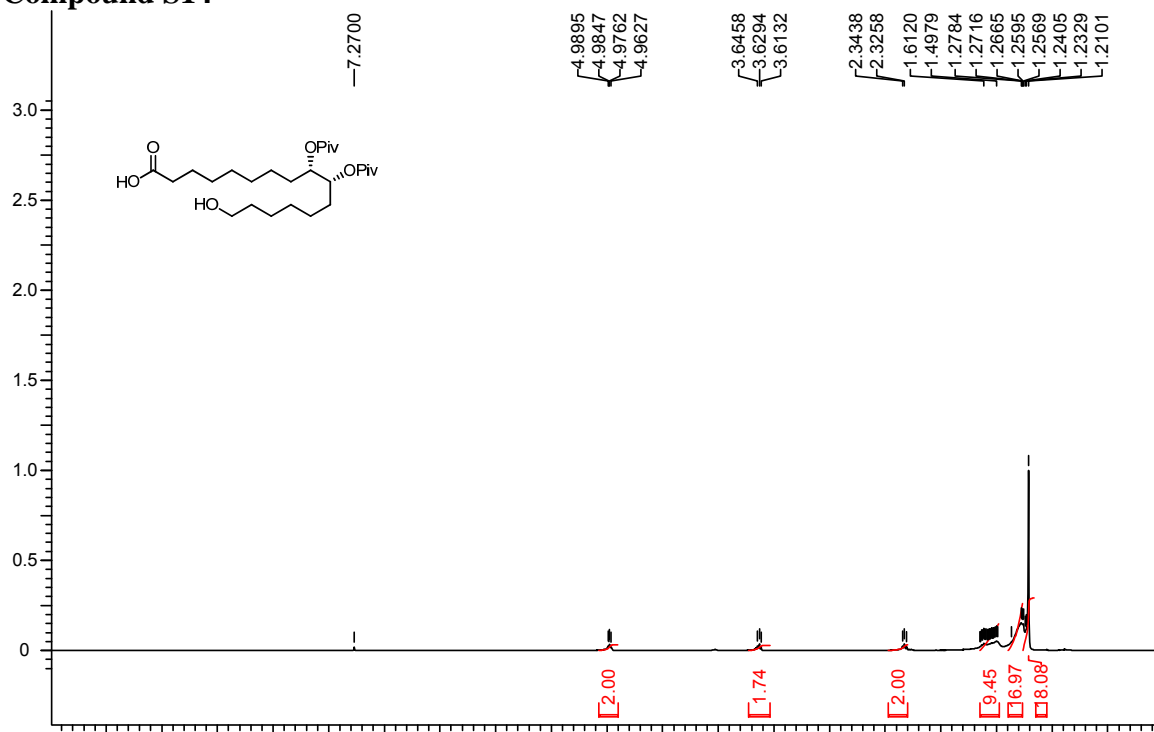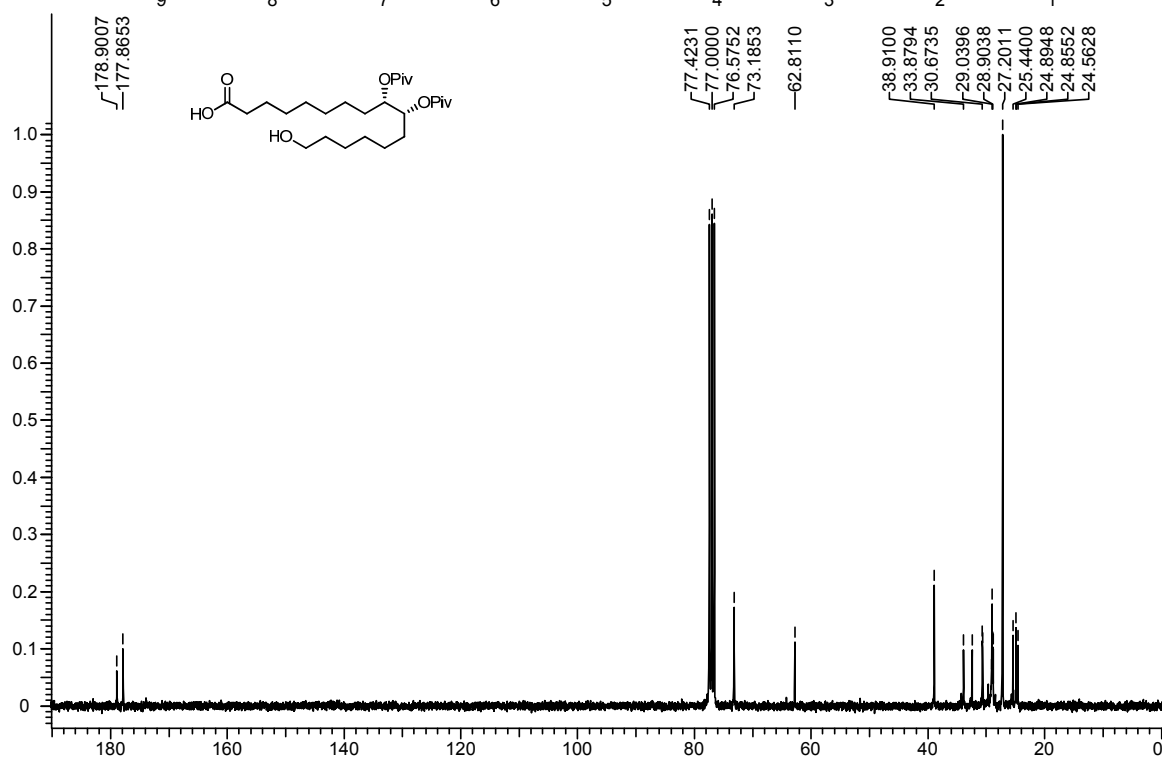

# Compound S15

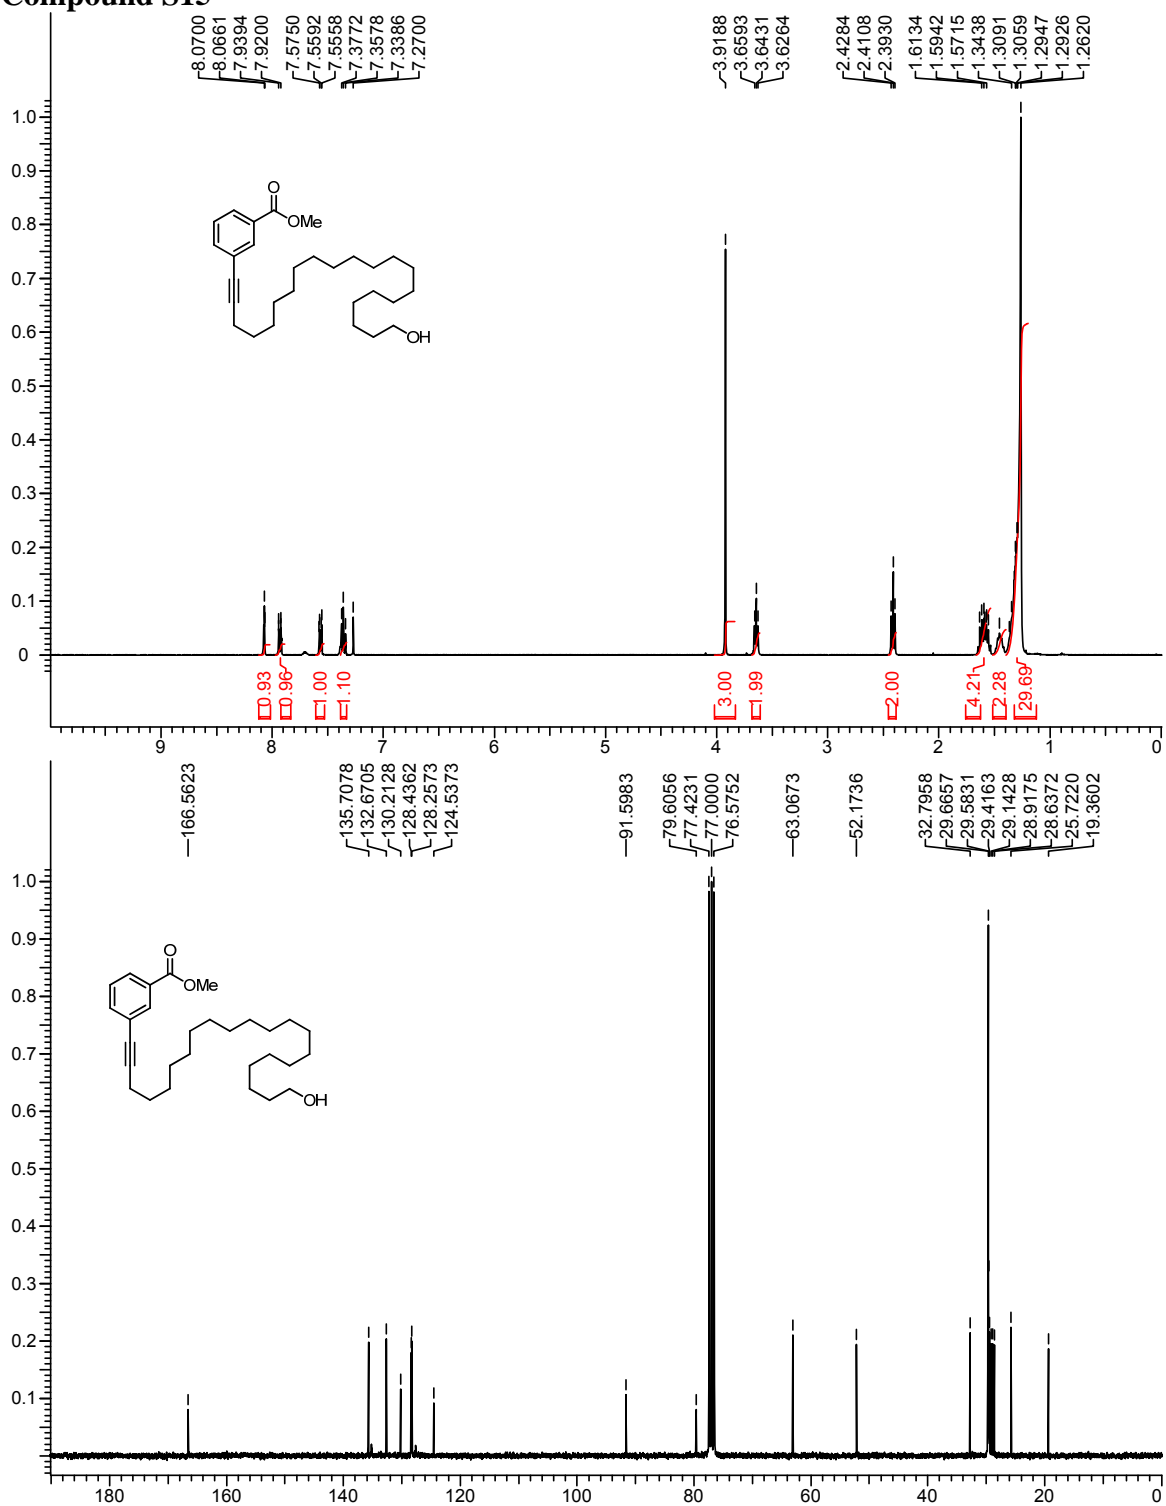

# Compound S16

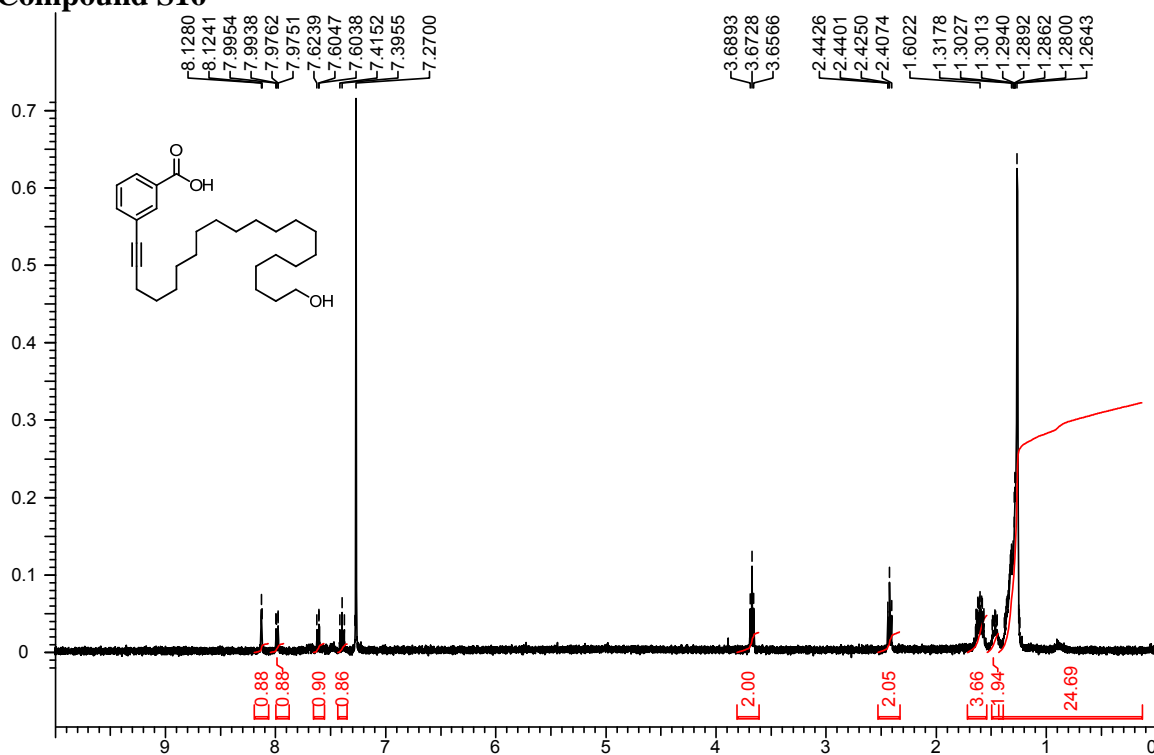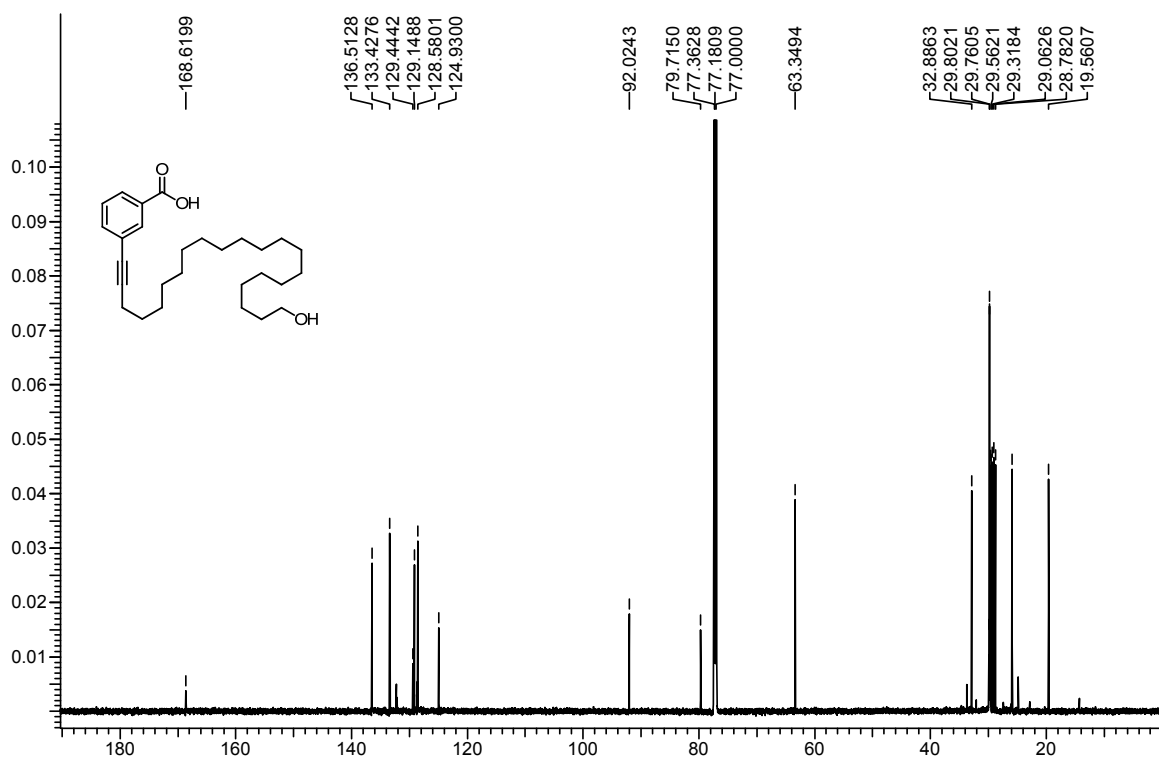

# Compound S17

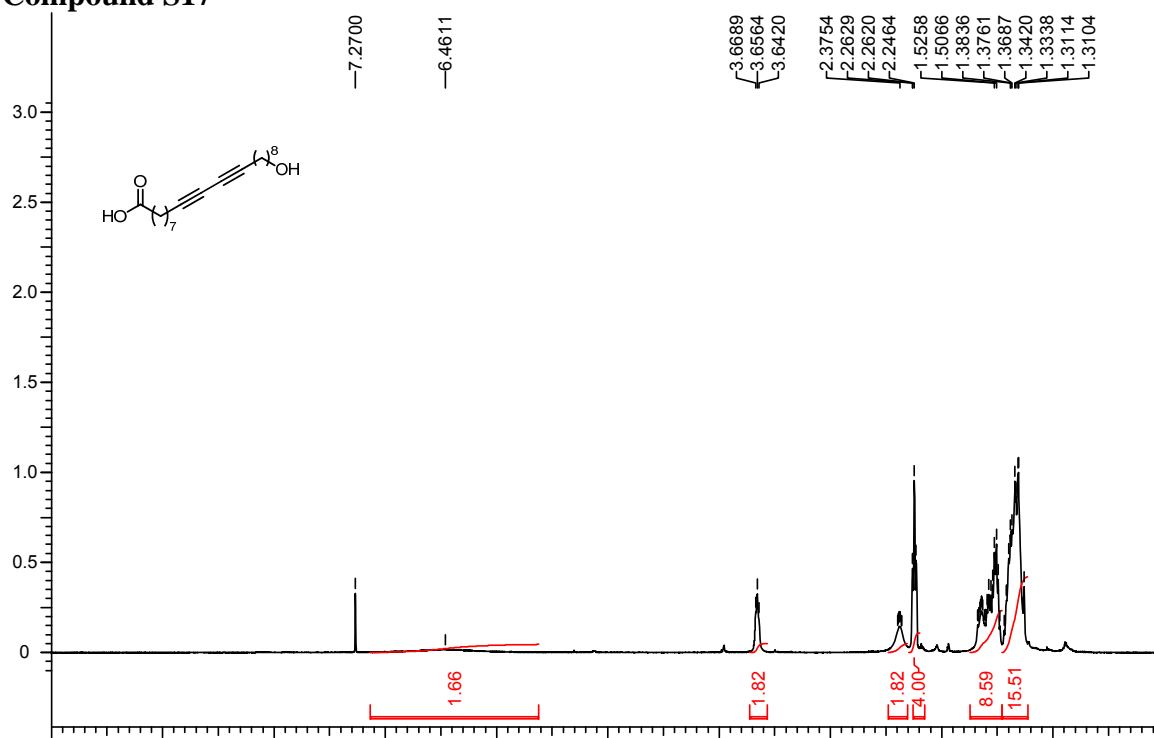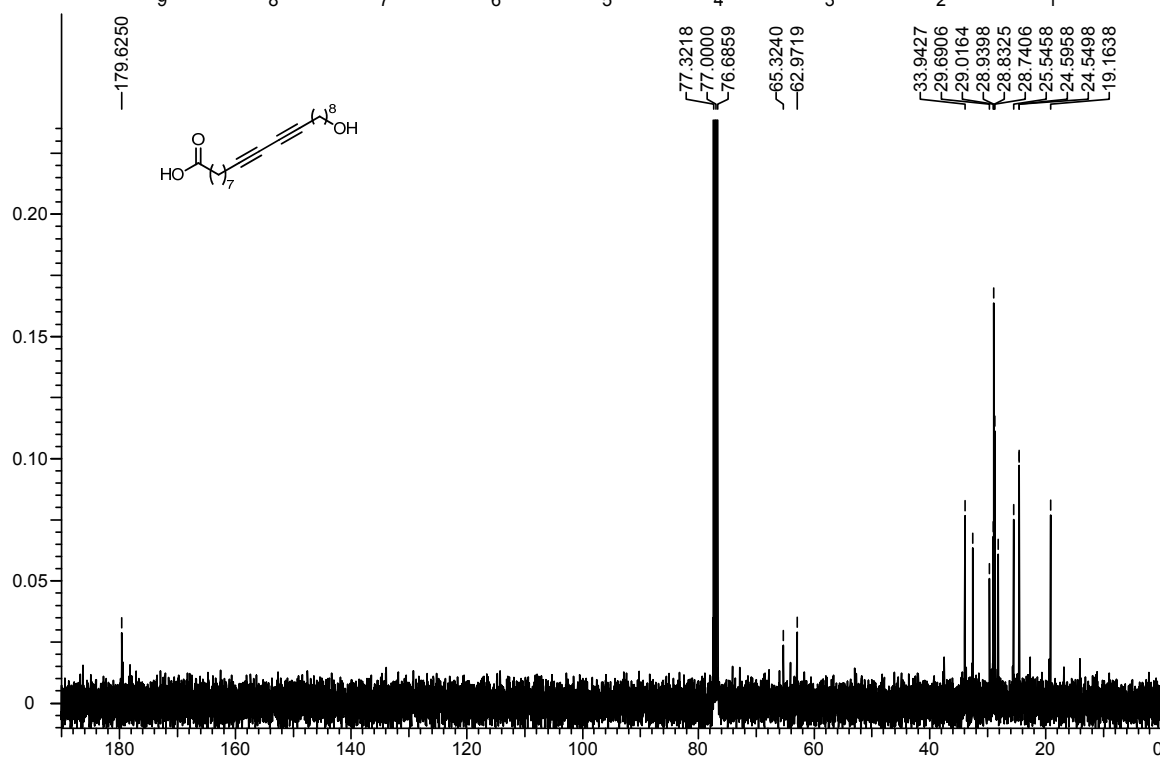

# Compound S18

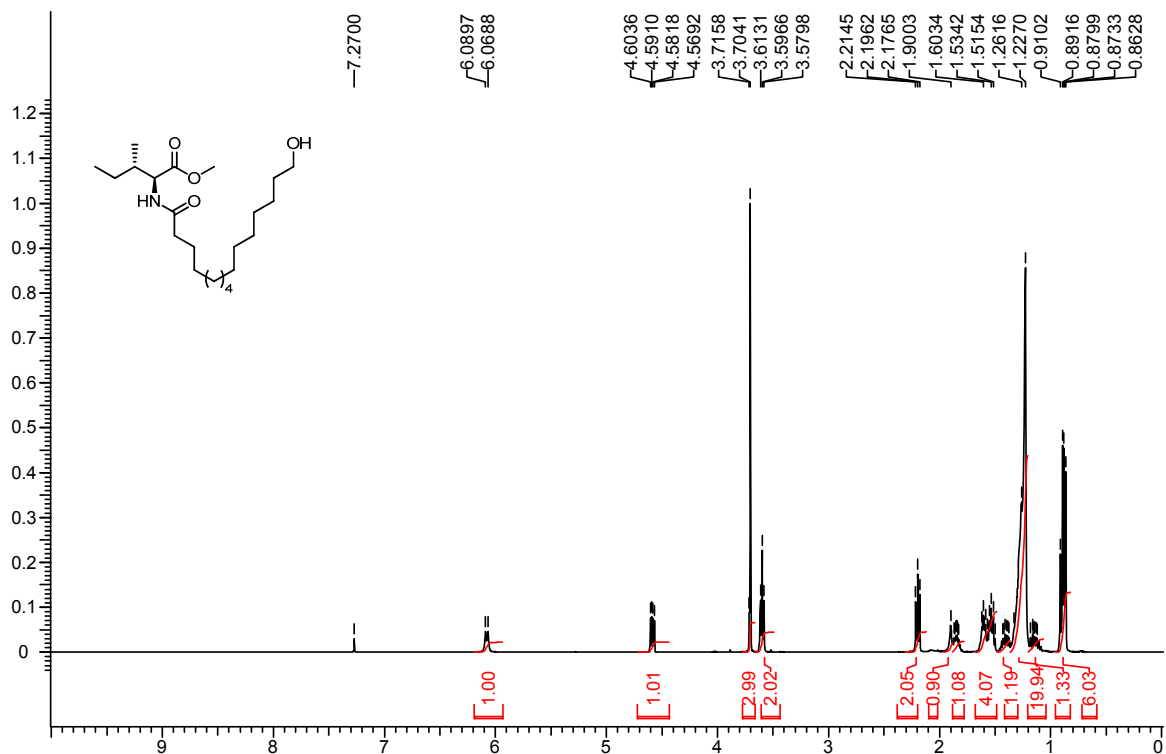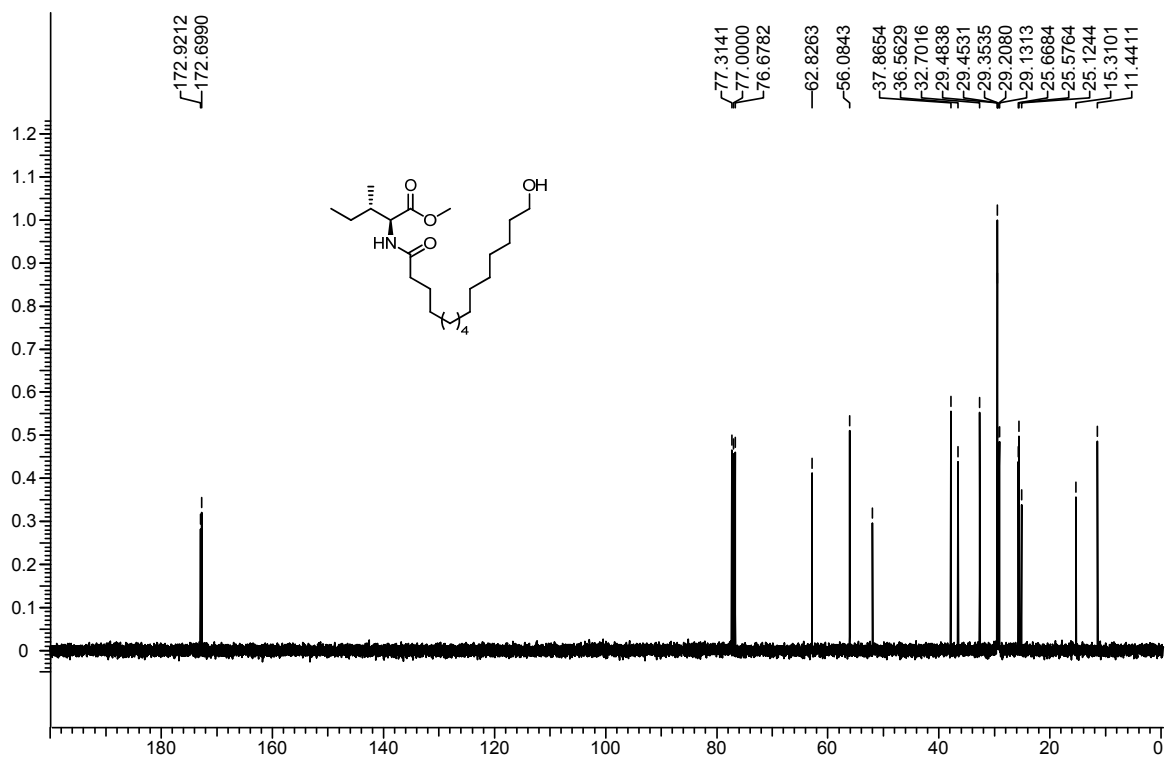

### Compound S19

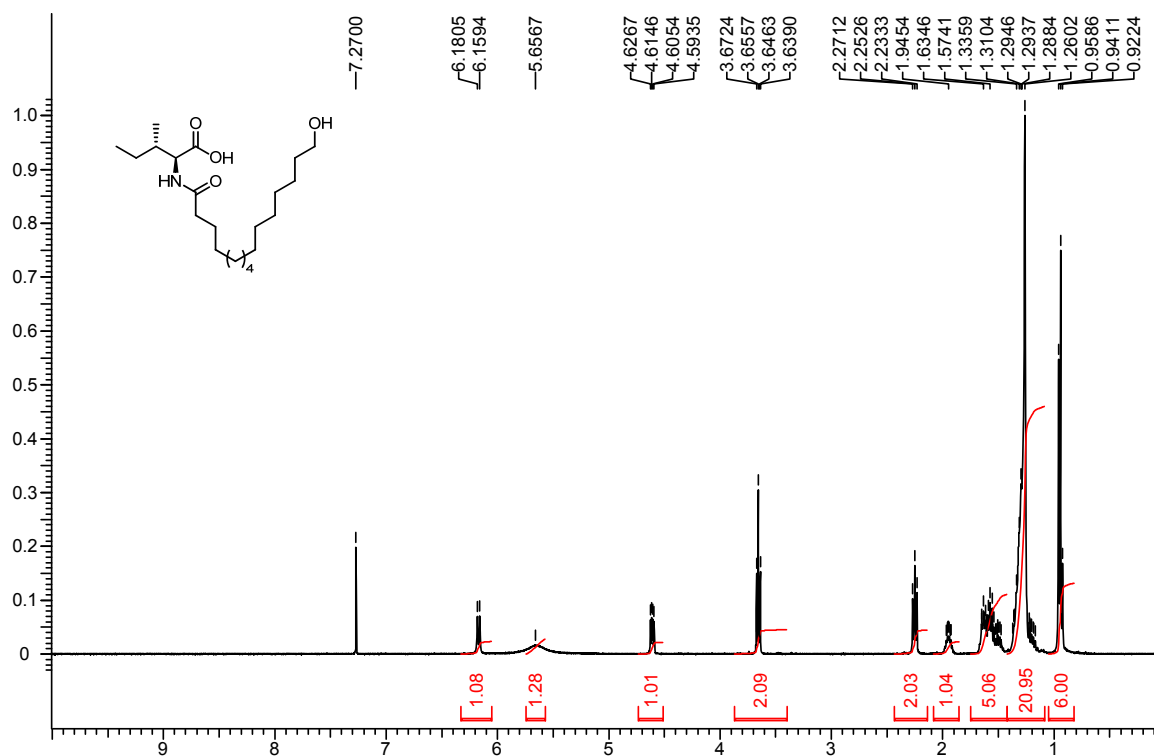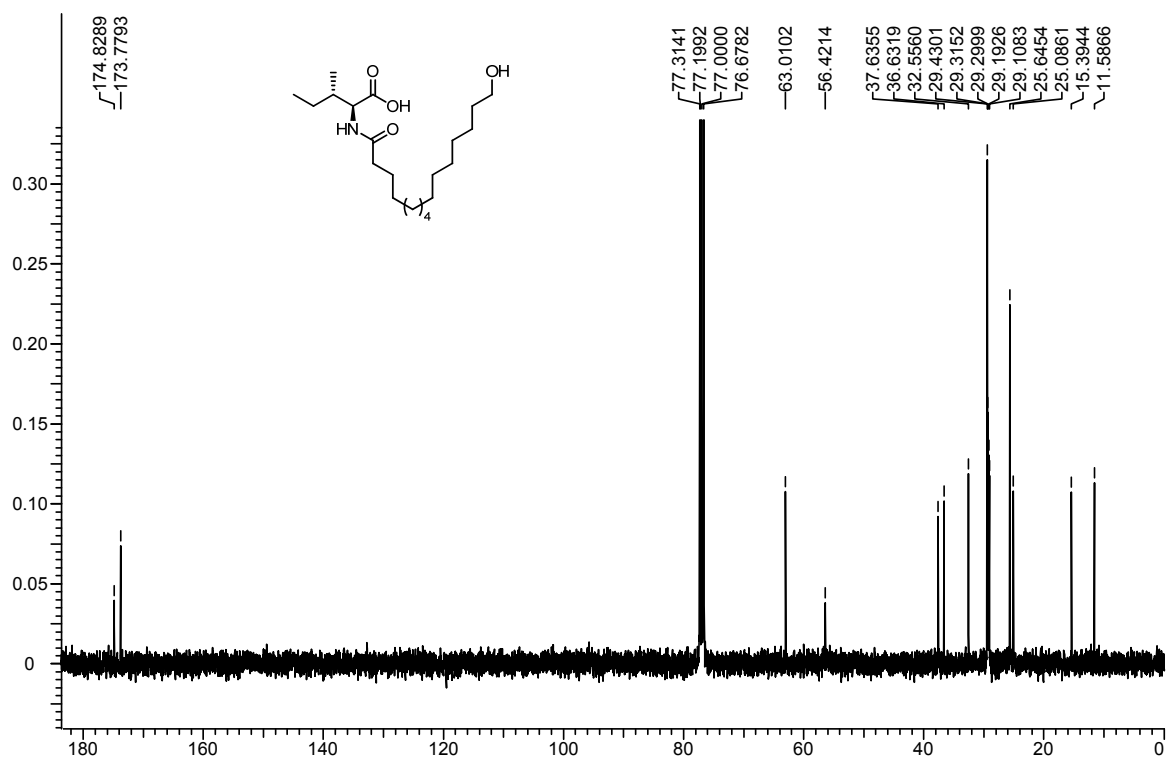

# Compound S20

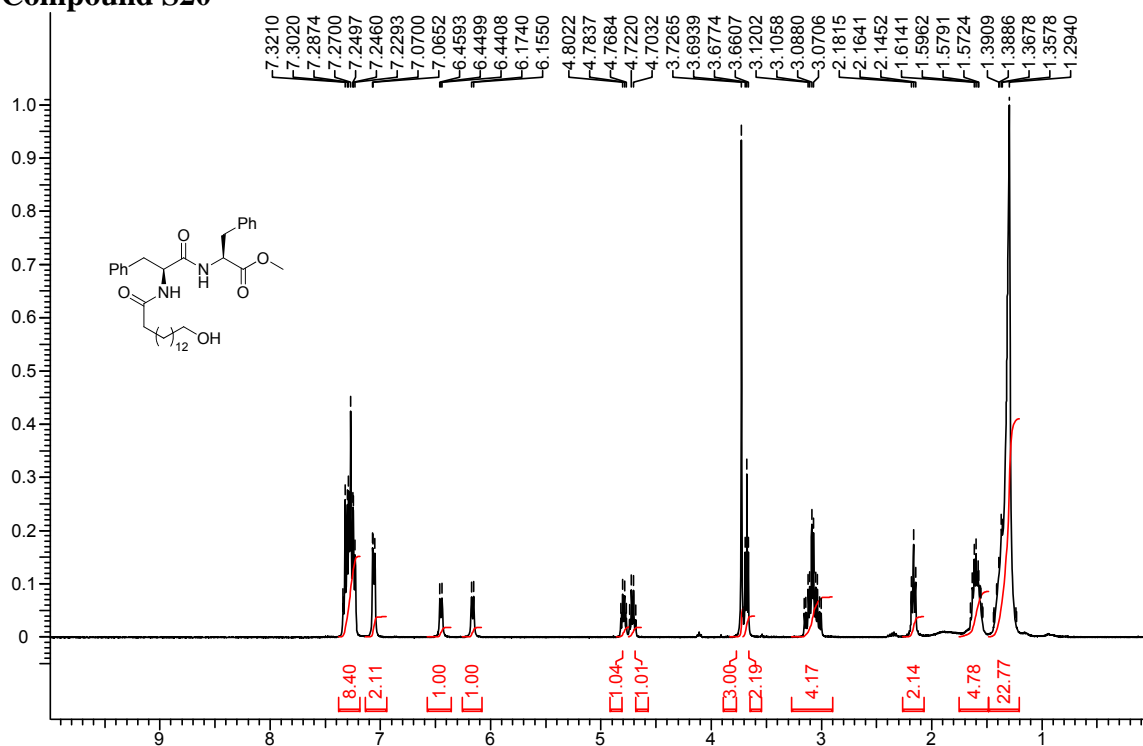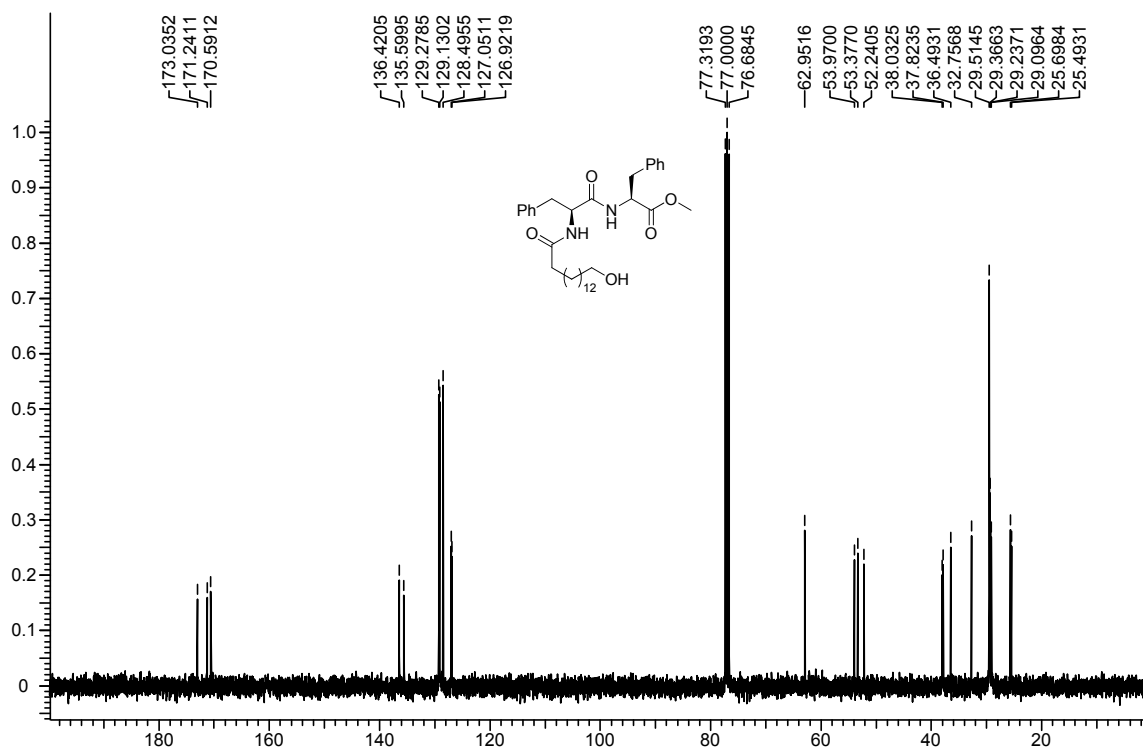



# Compound S21

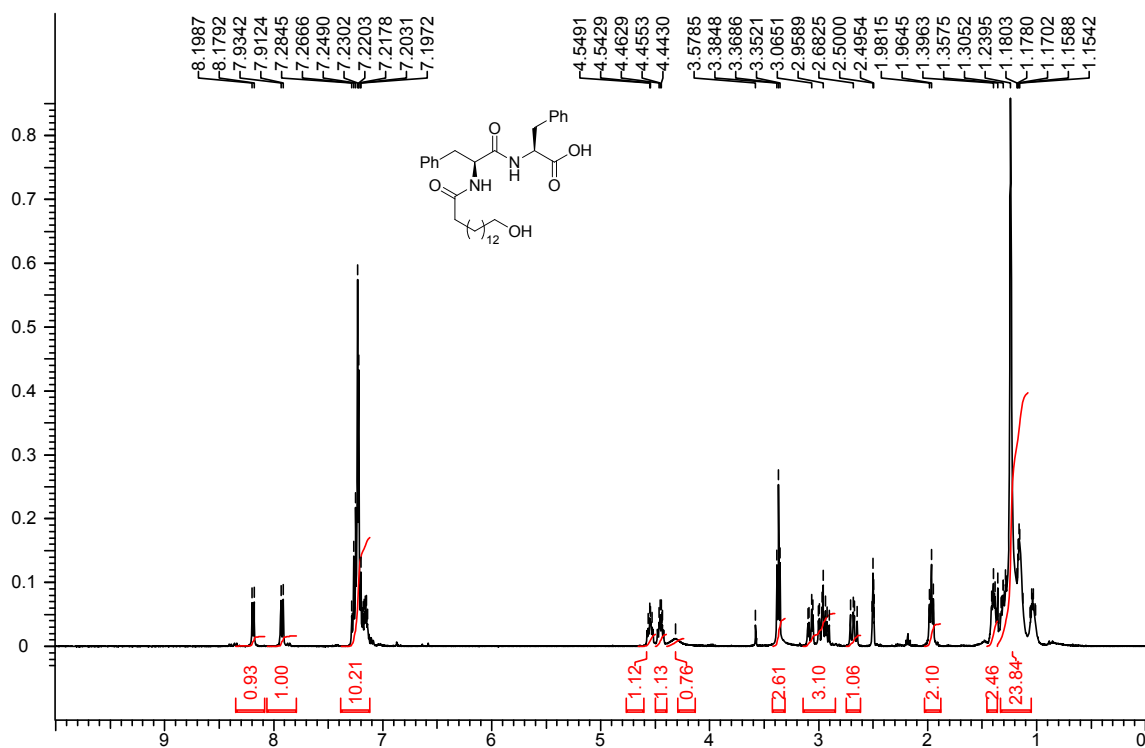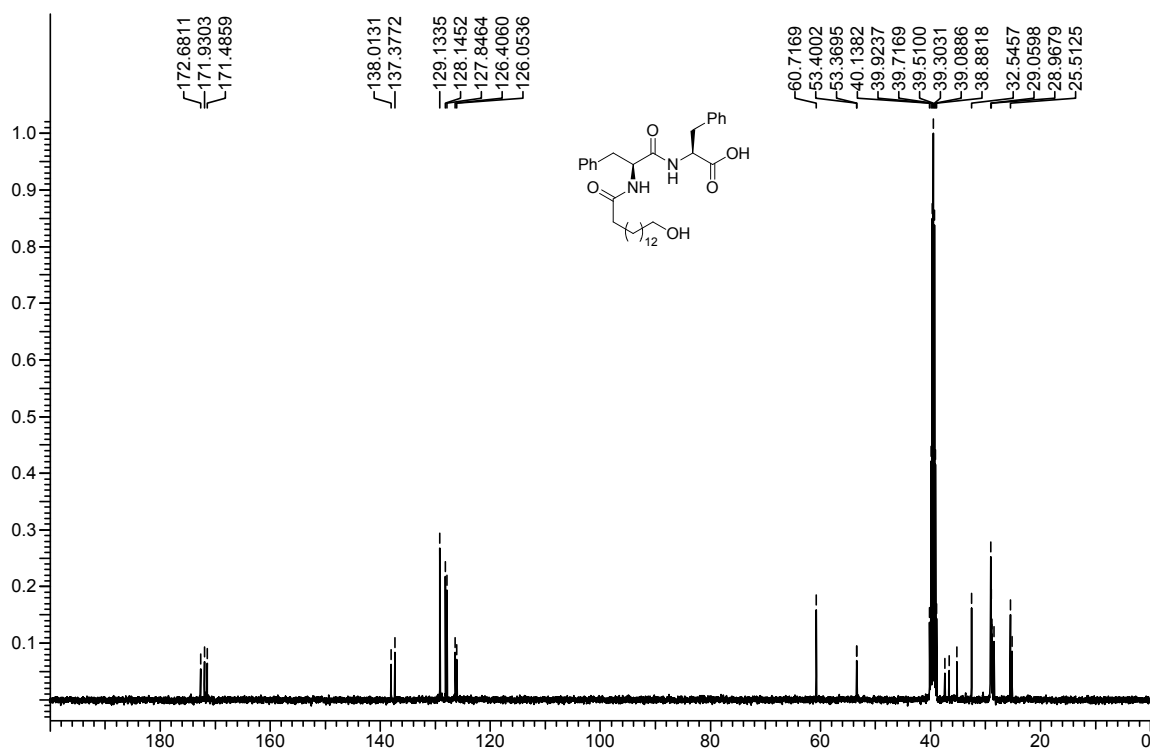

# Compound S22

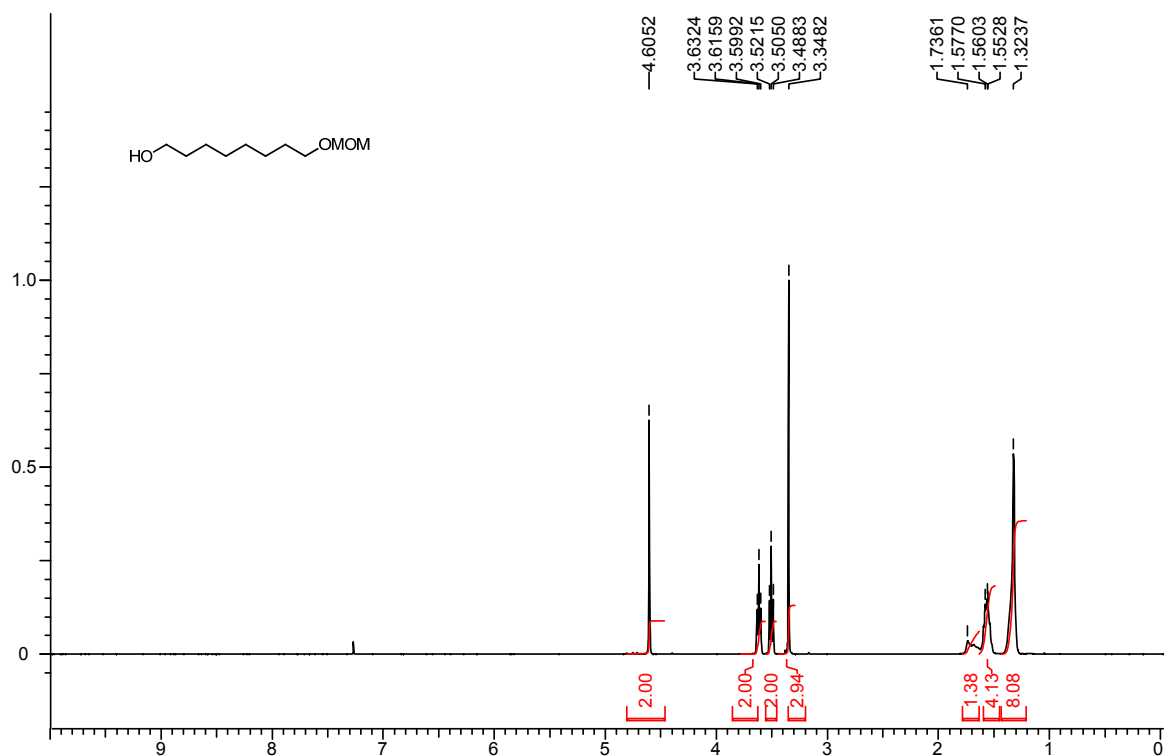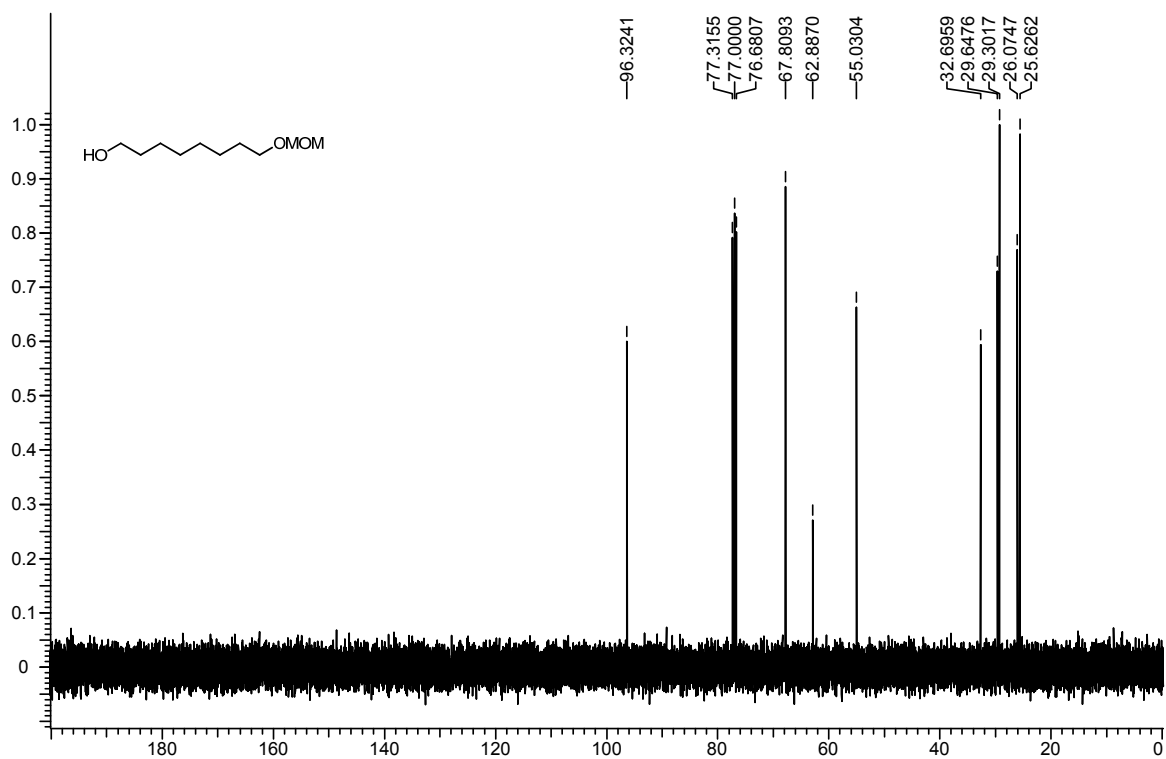

# Compound 6

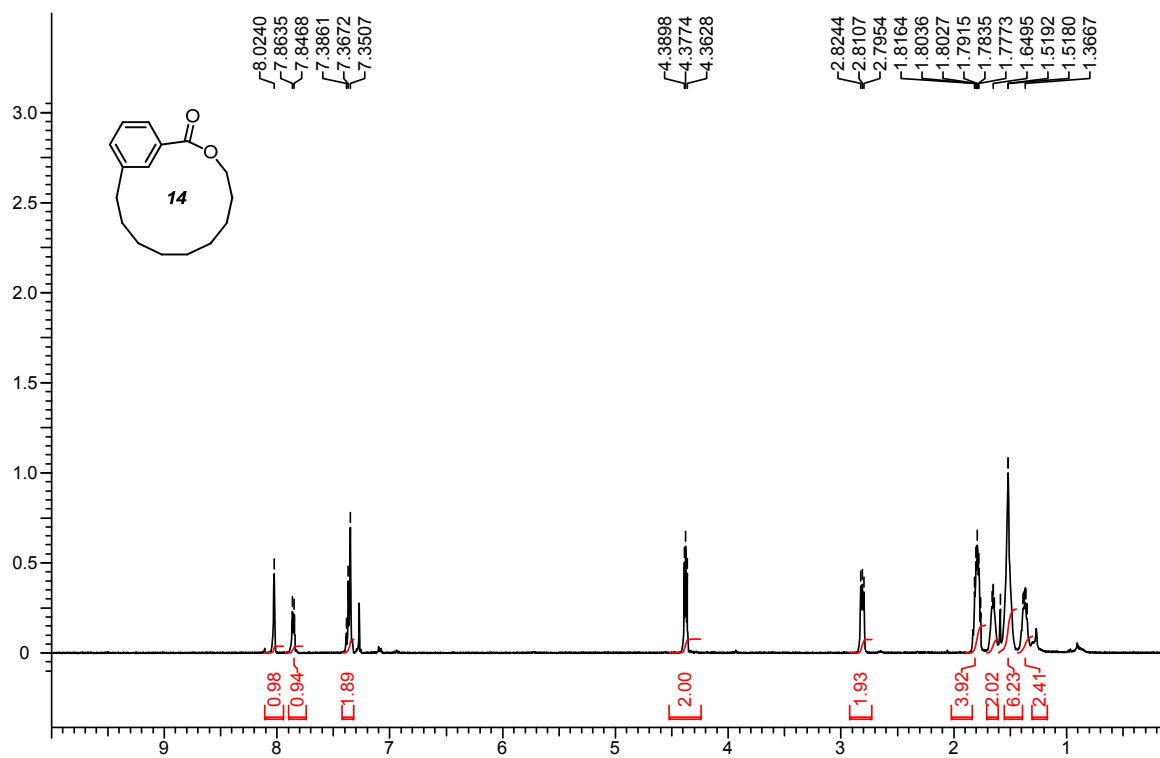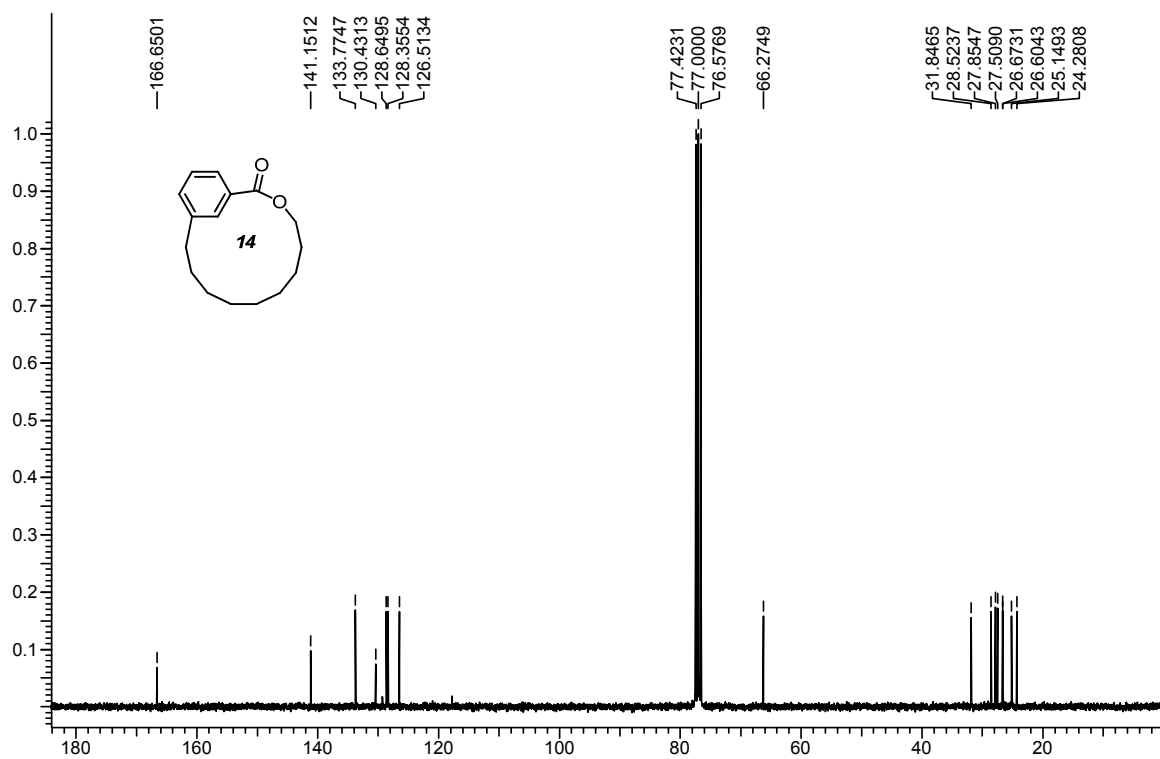

# Compound 7

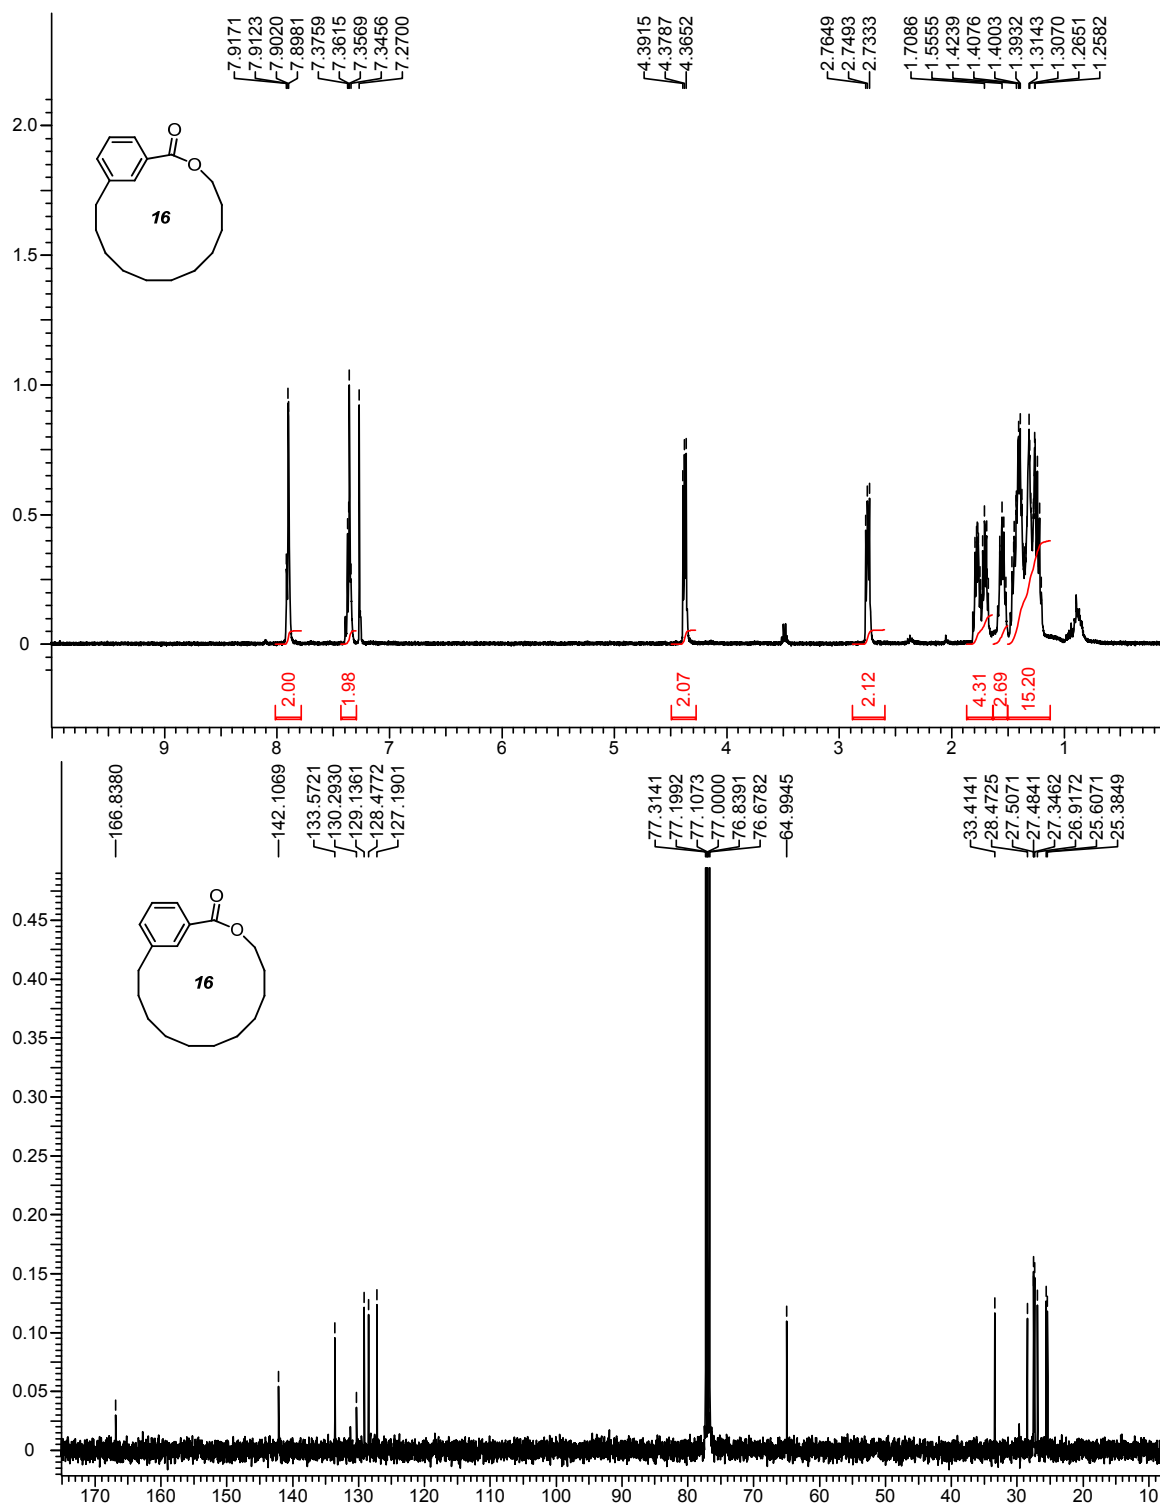

# Compound 8

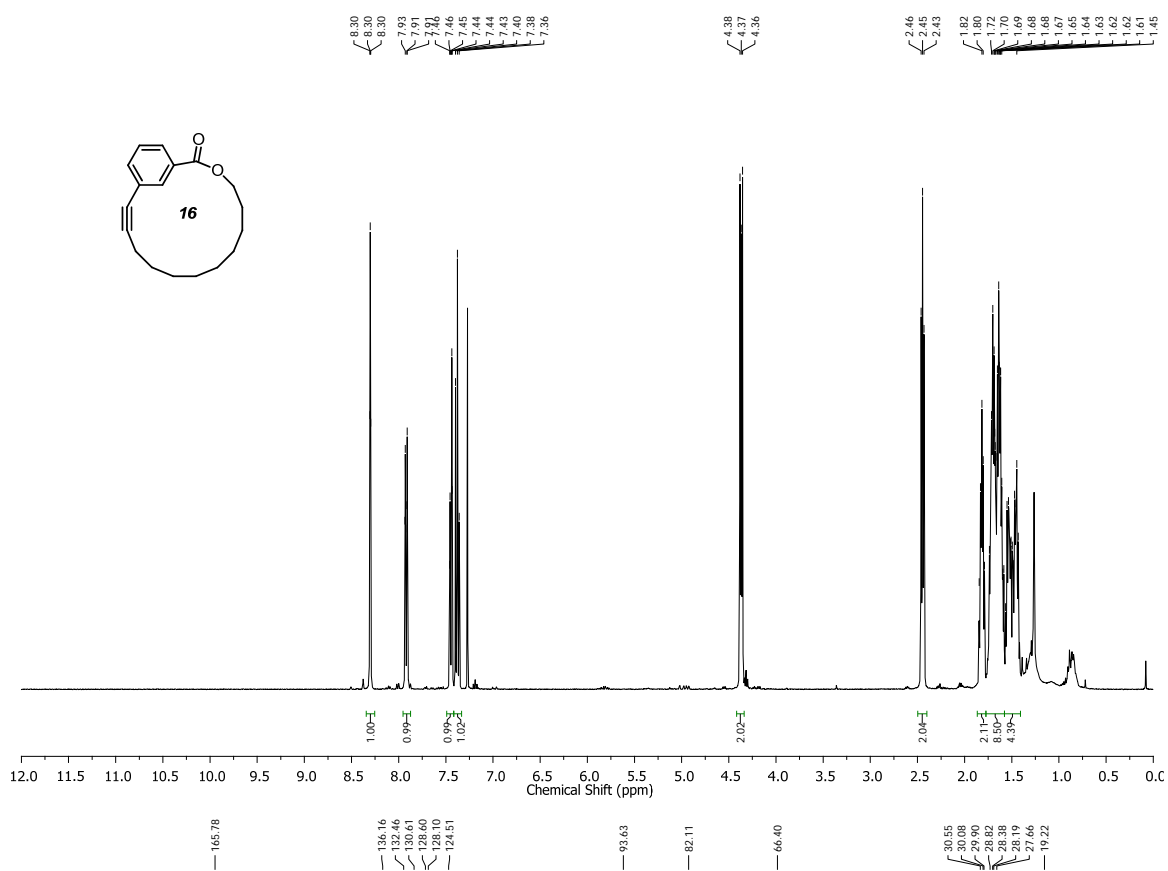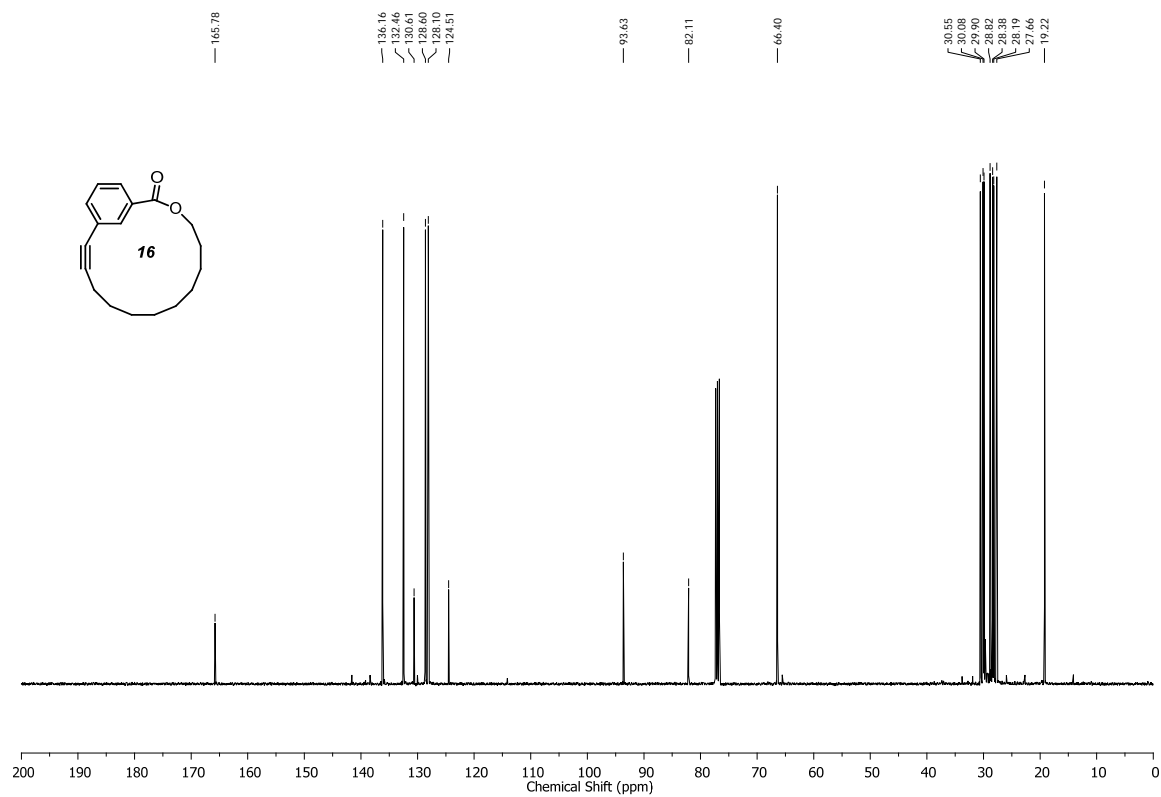

# Compound 9

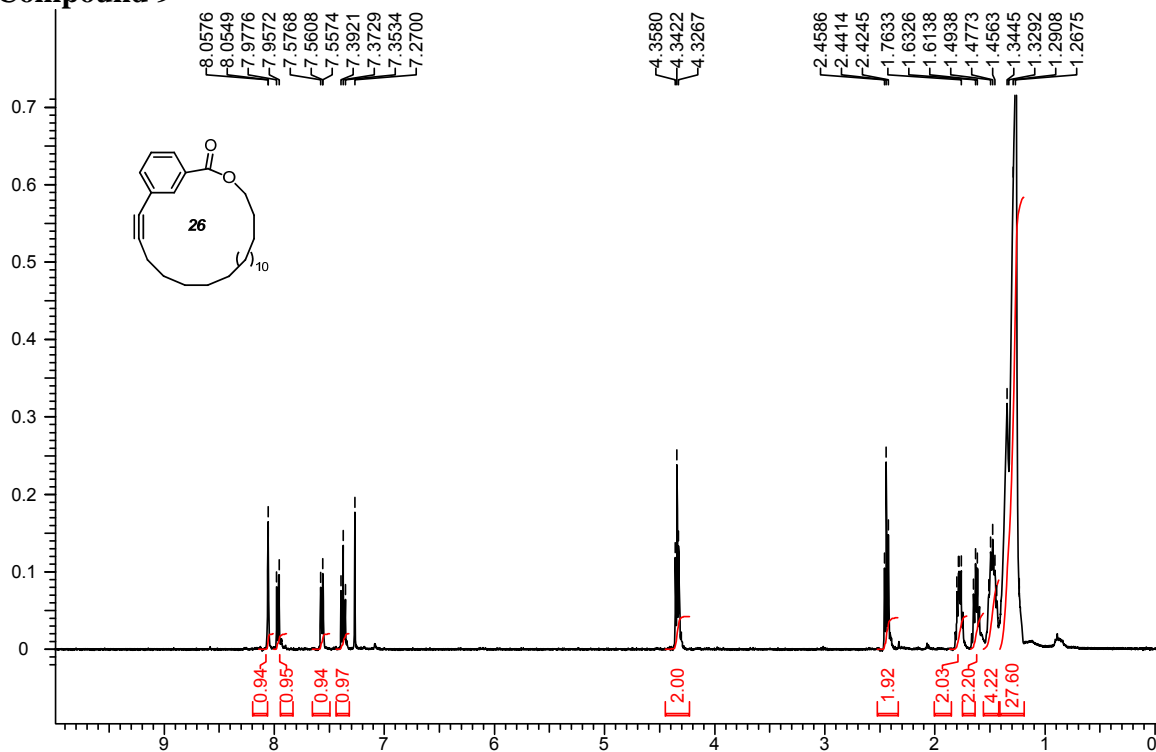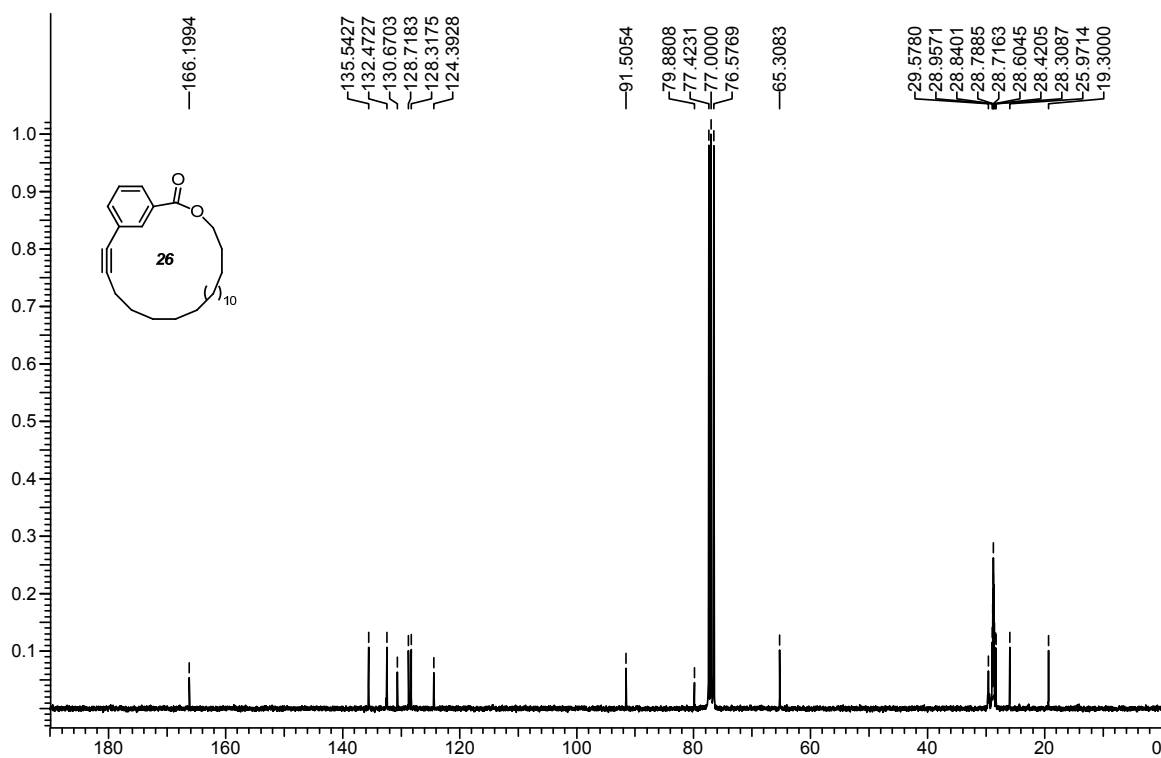

# Compound 11

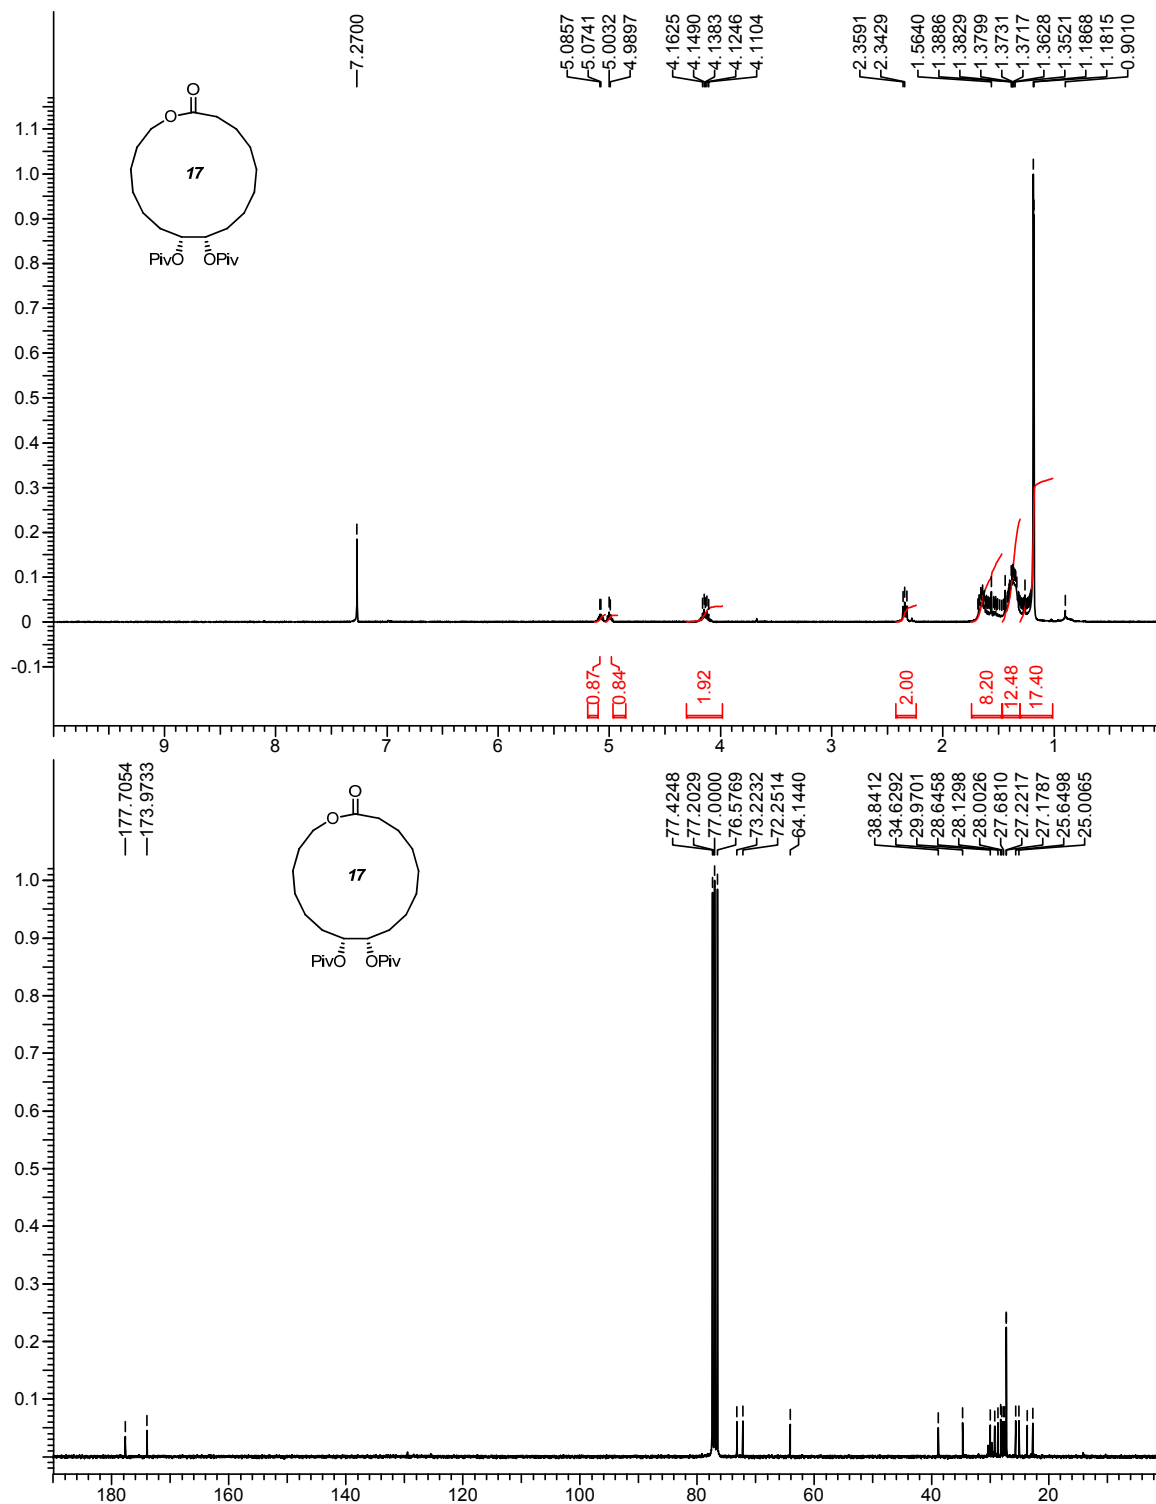

# Compound 13

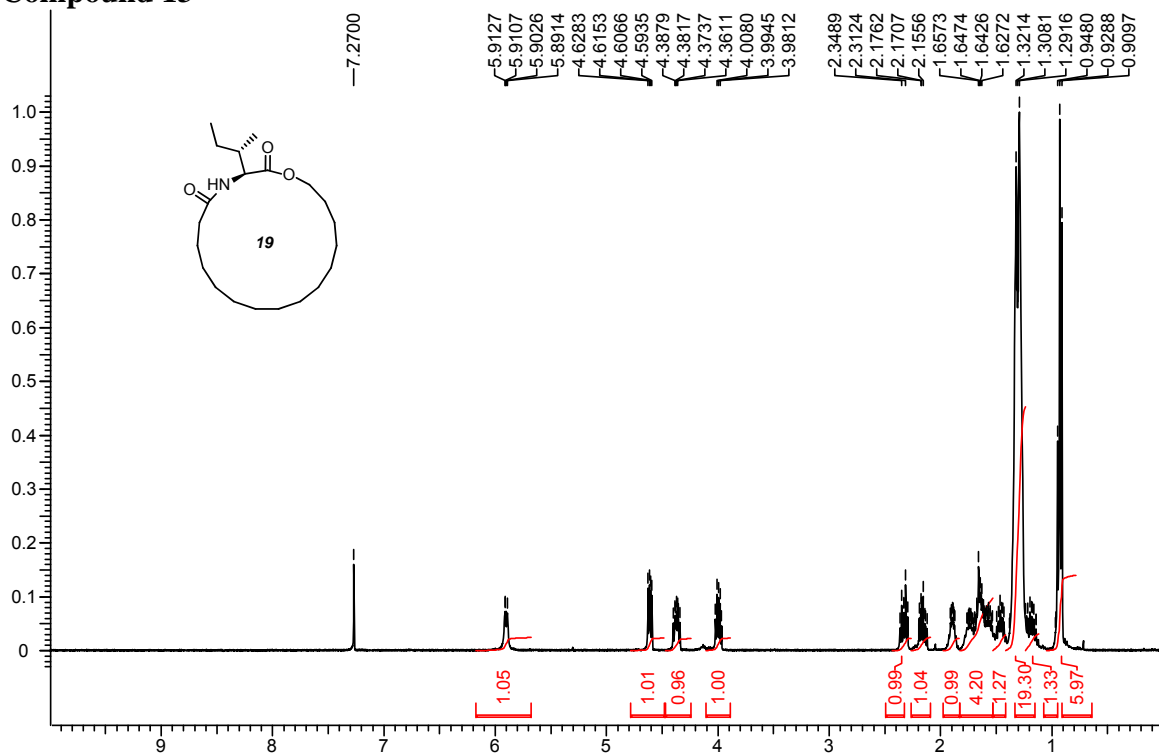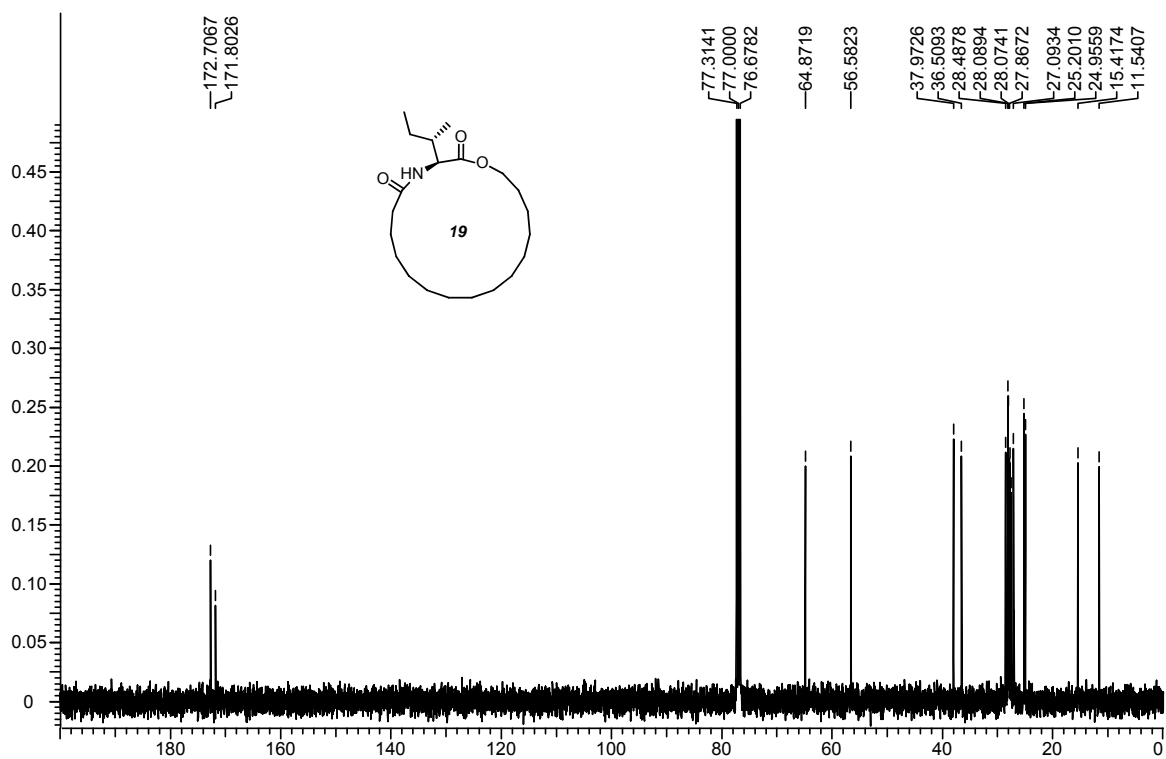



# Compound 14

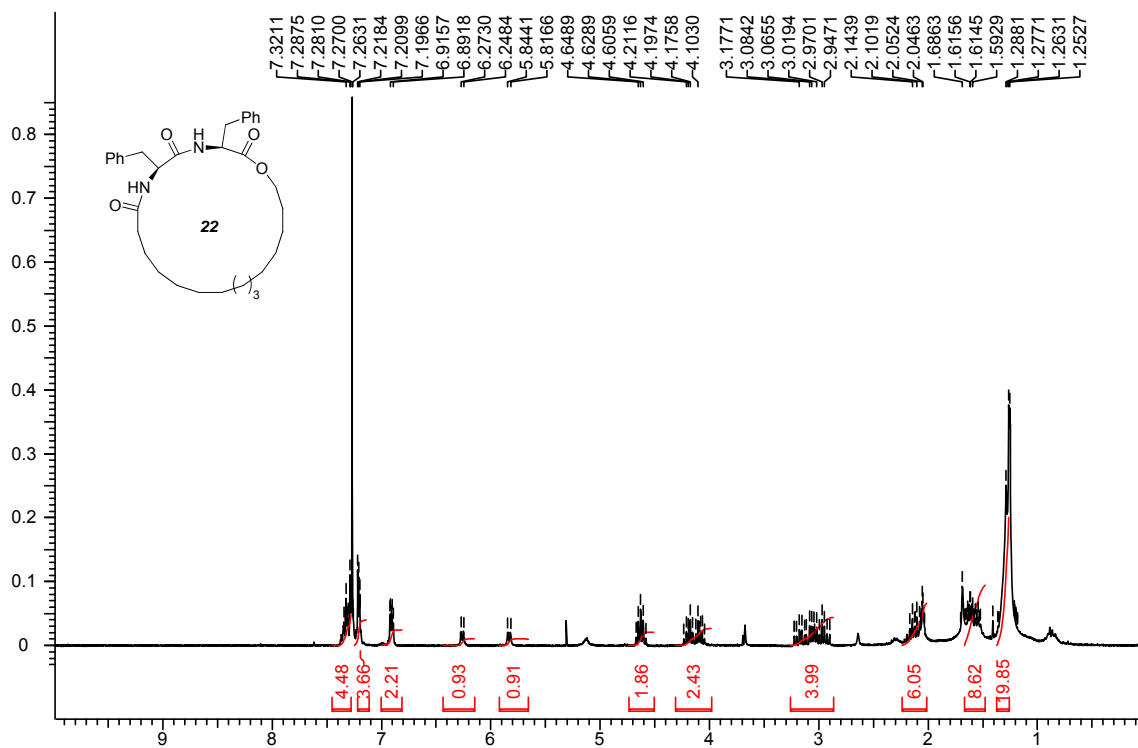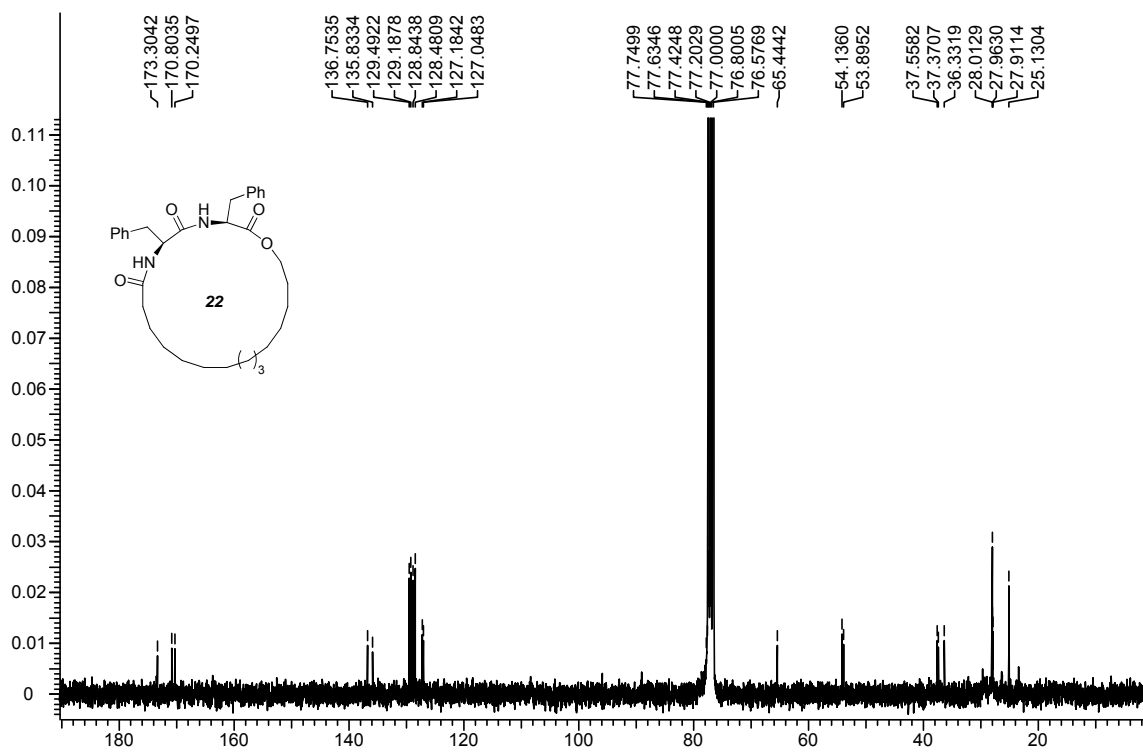

# Compound 20

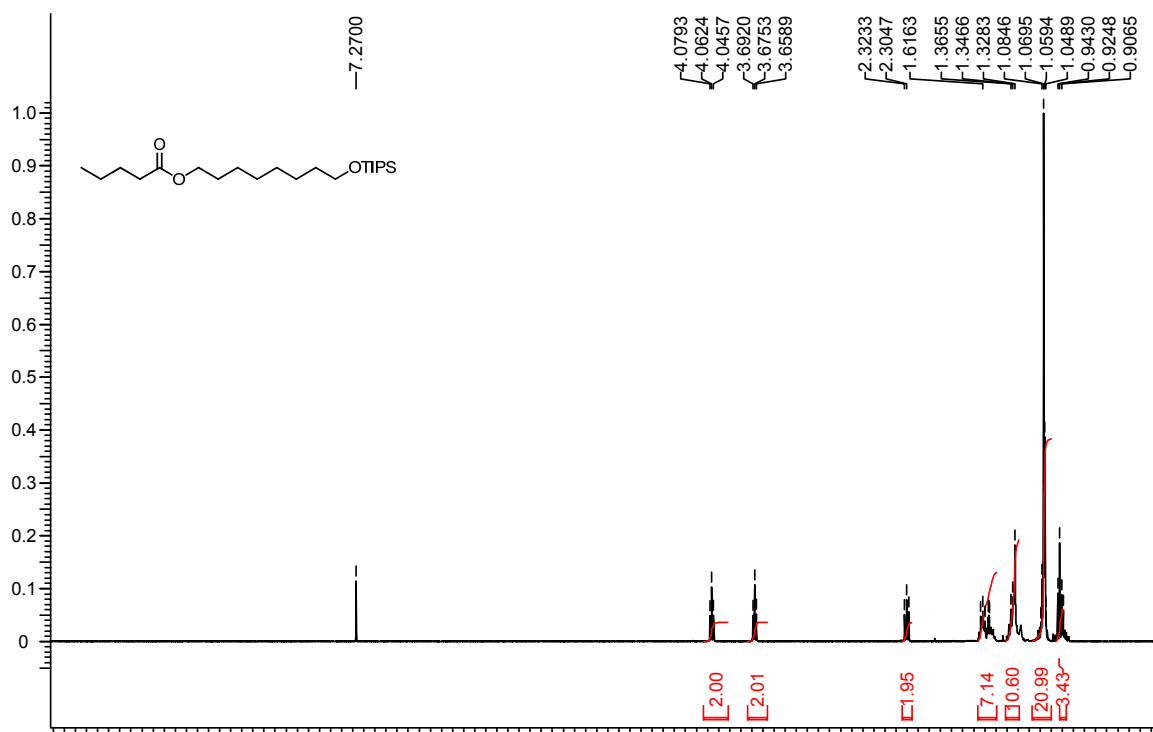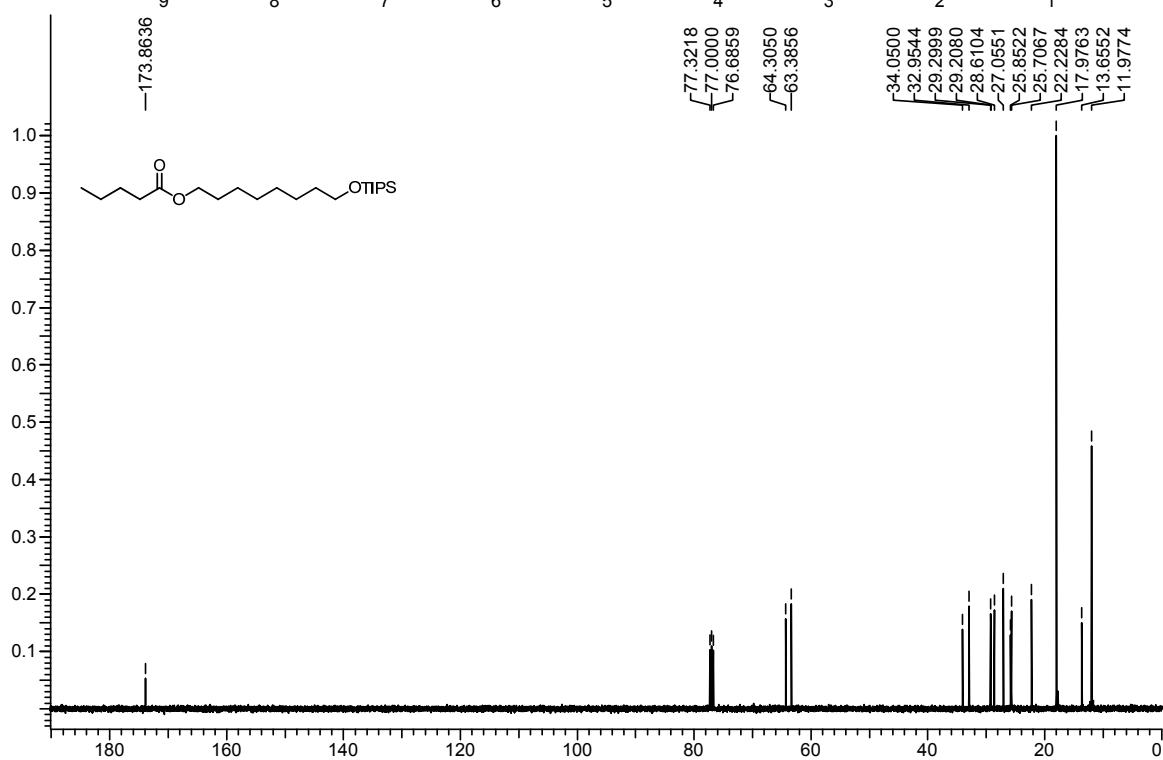

# Compound 19

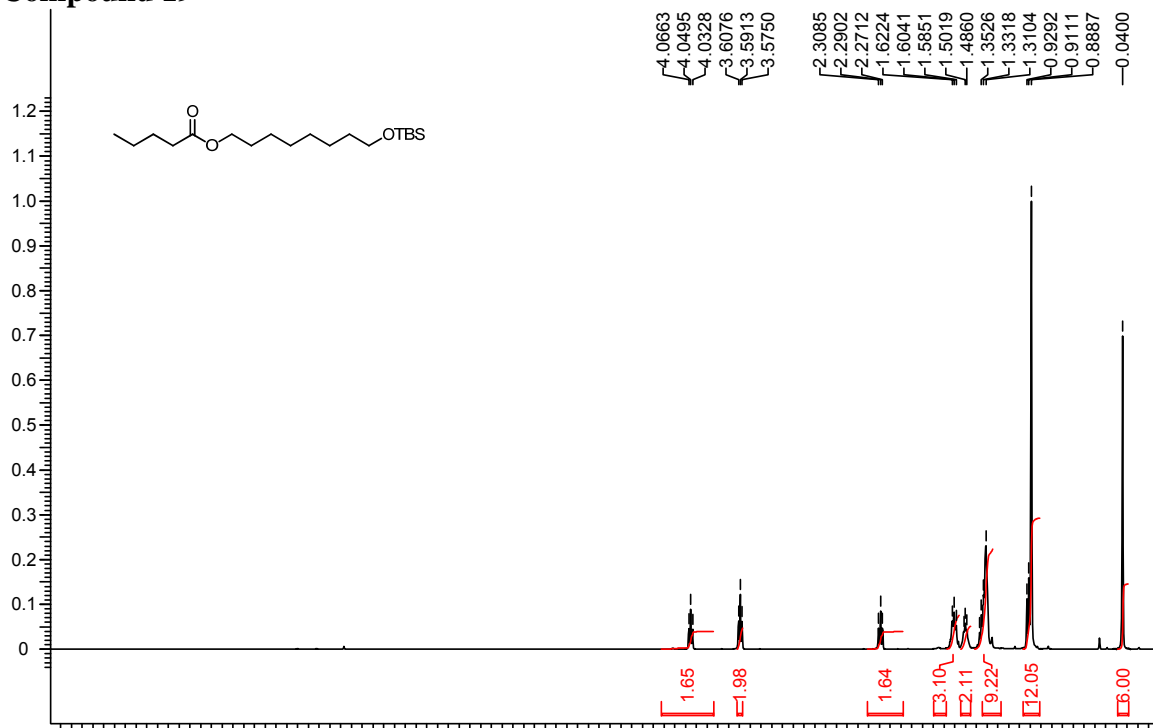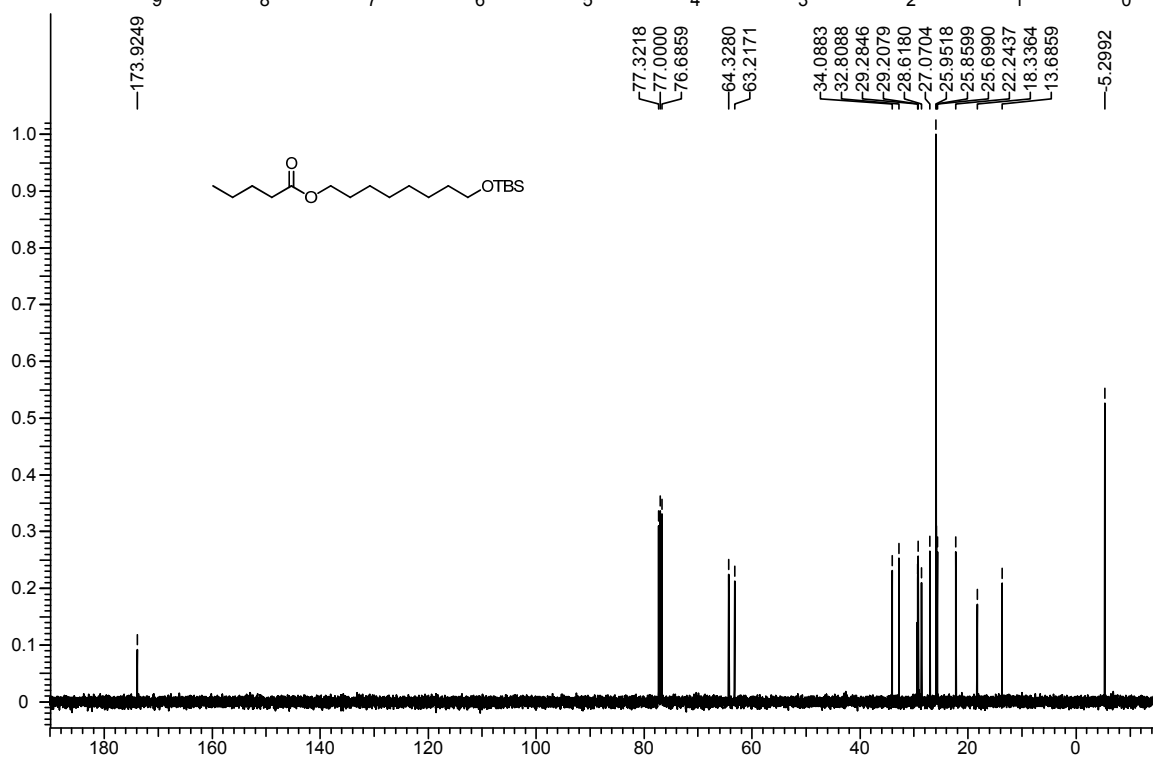

# Compound 21

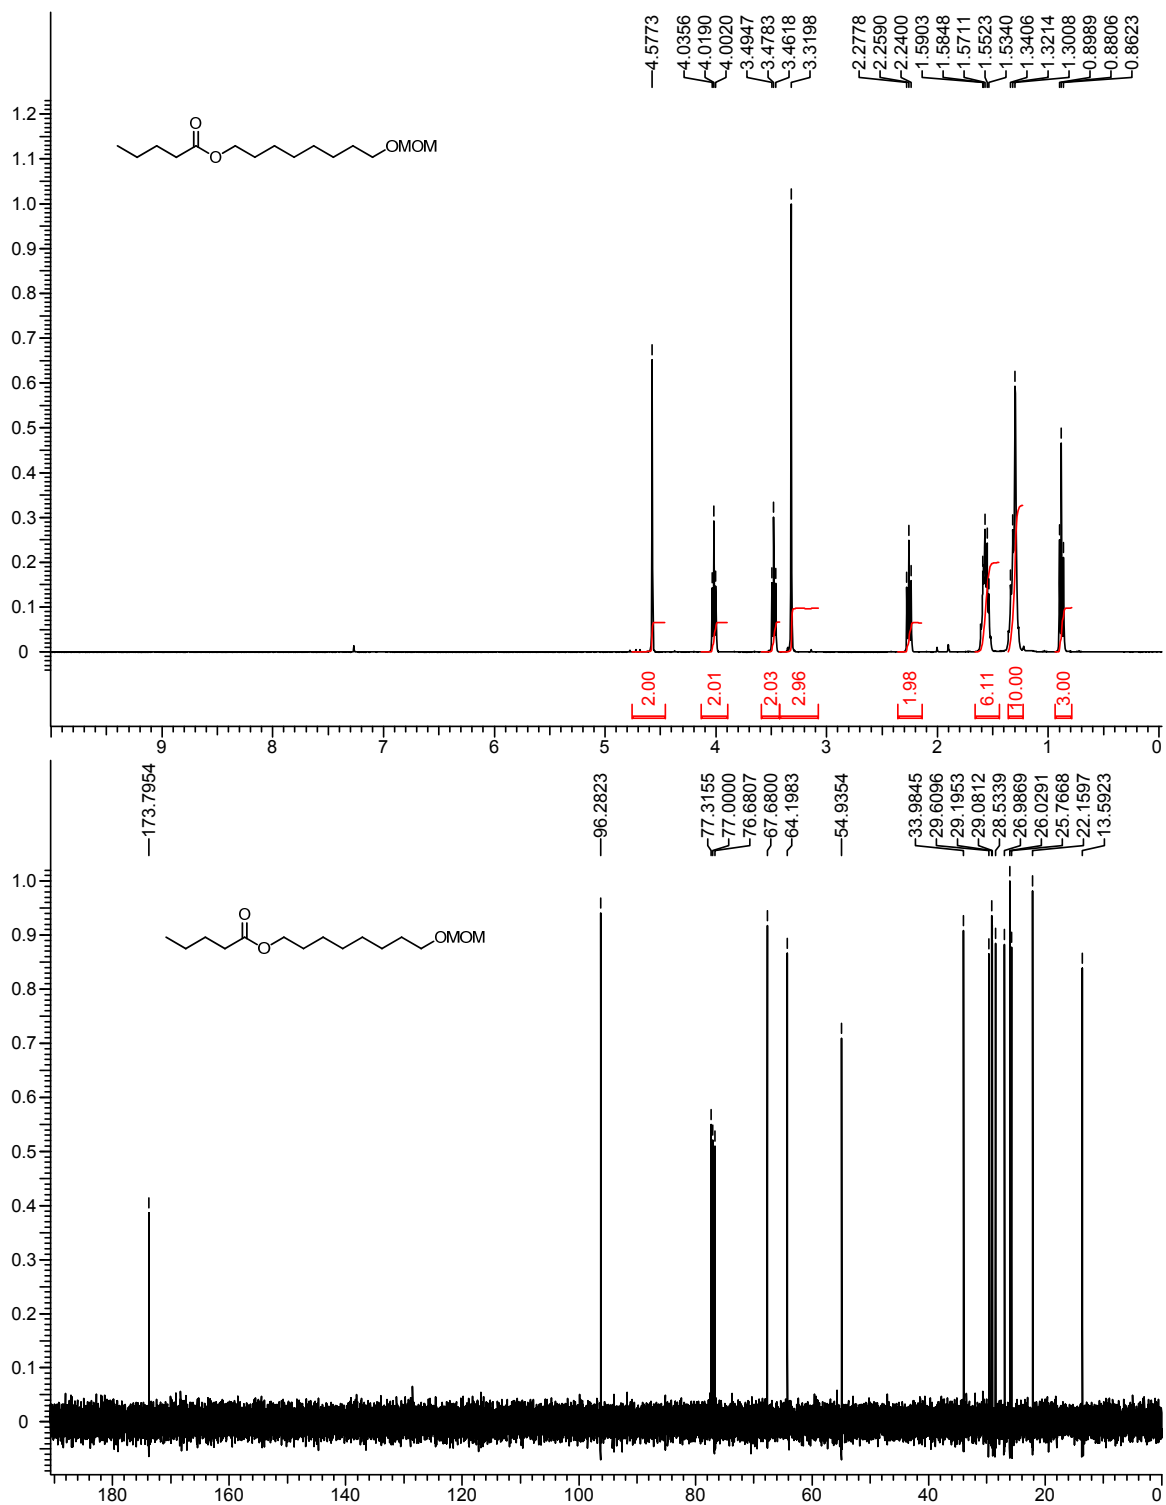

# Compound 24

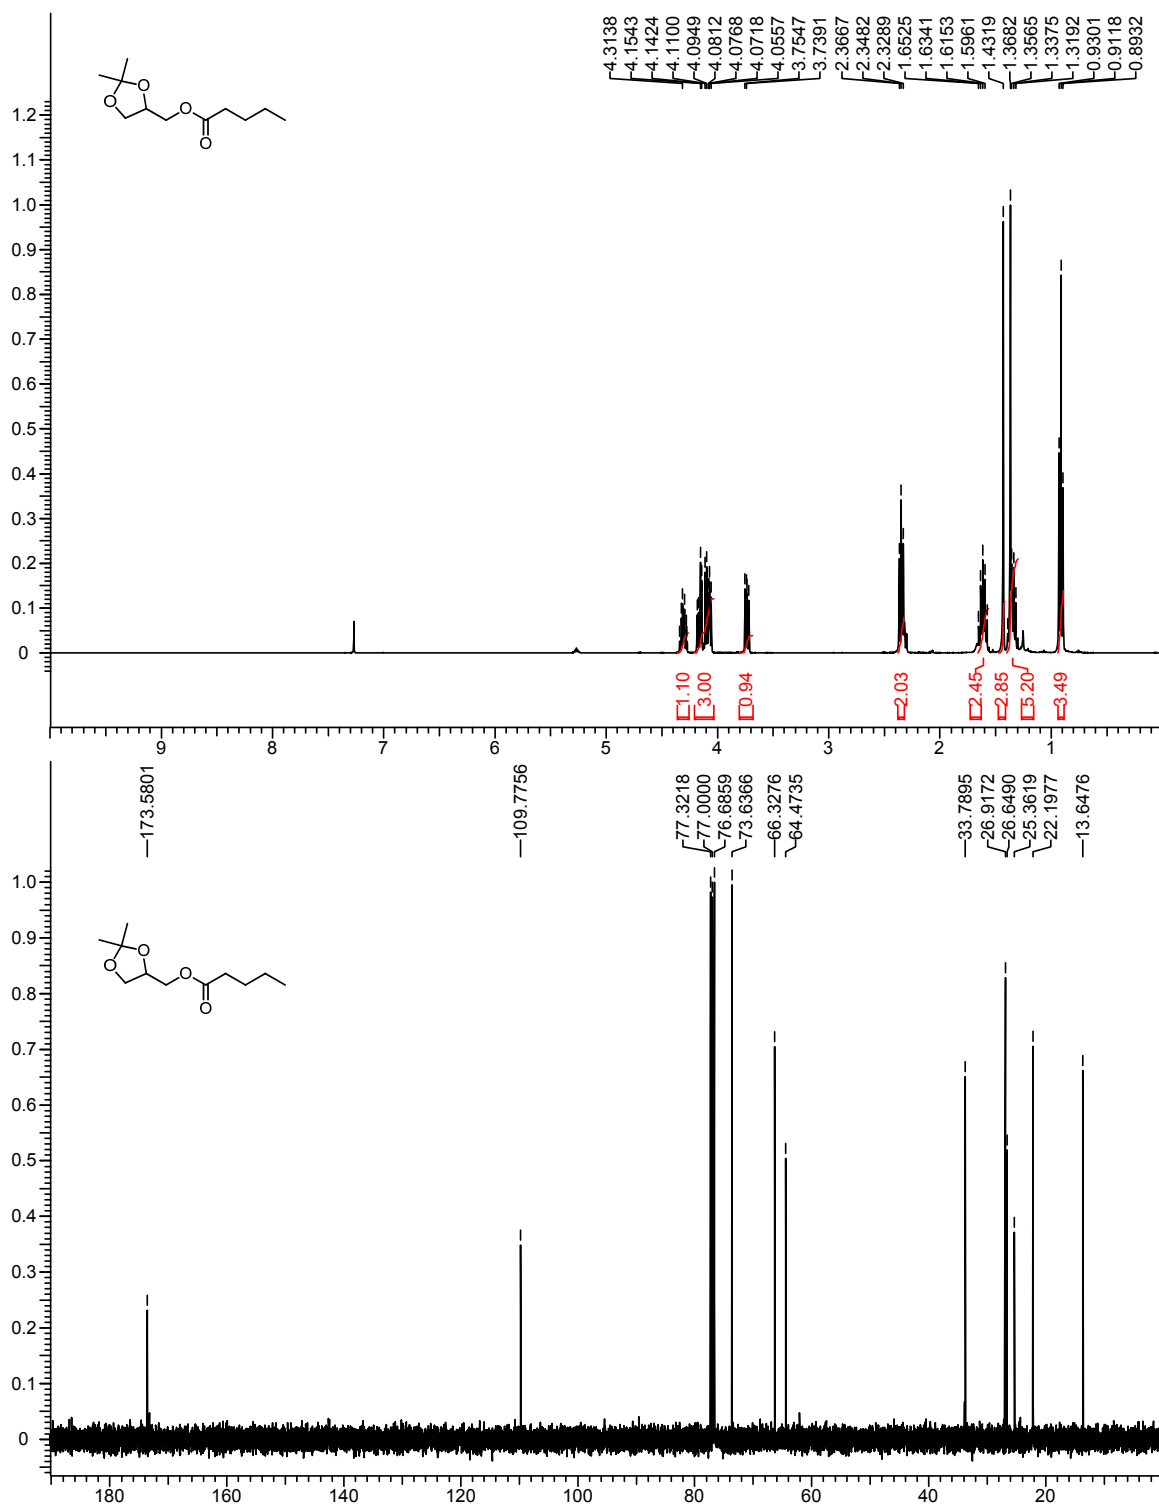

# Compound 26

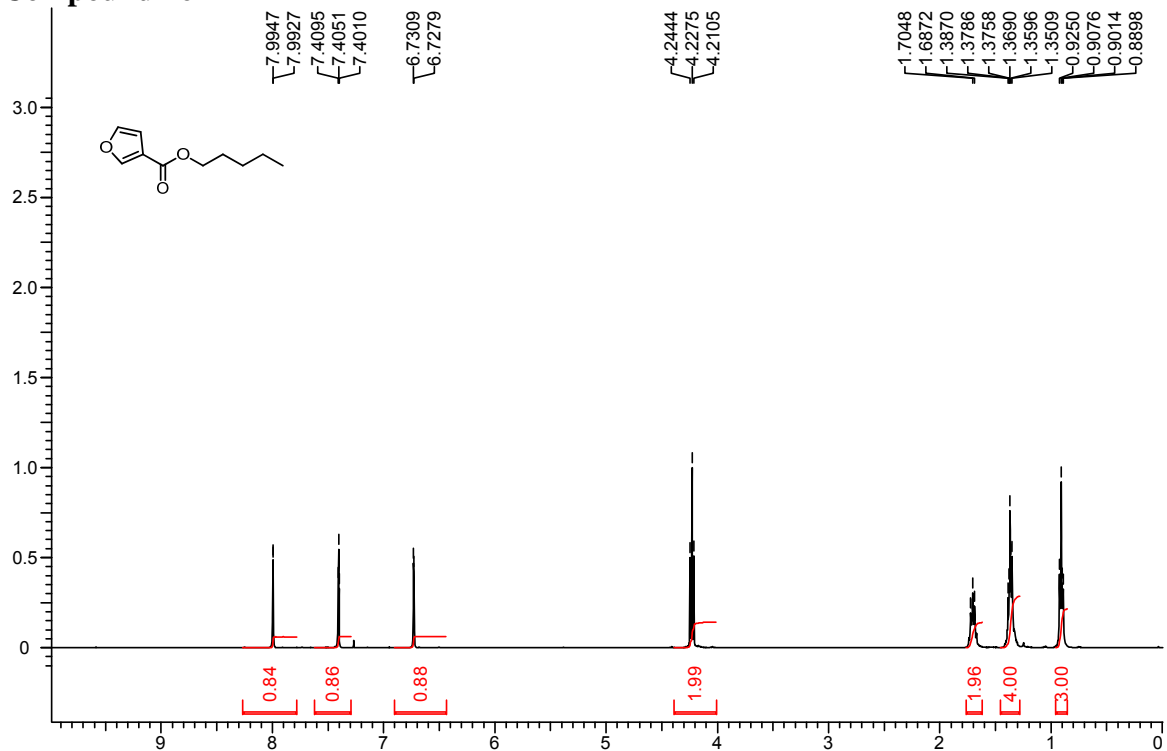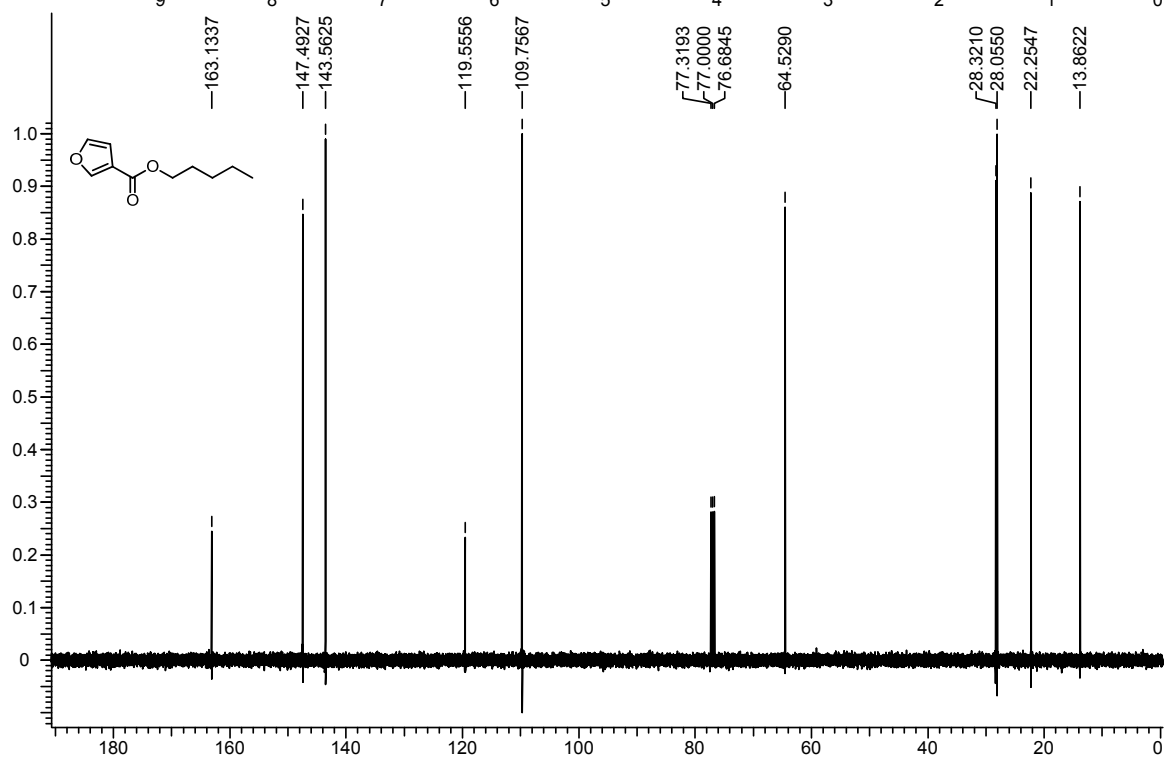

# Compound 27

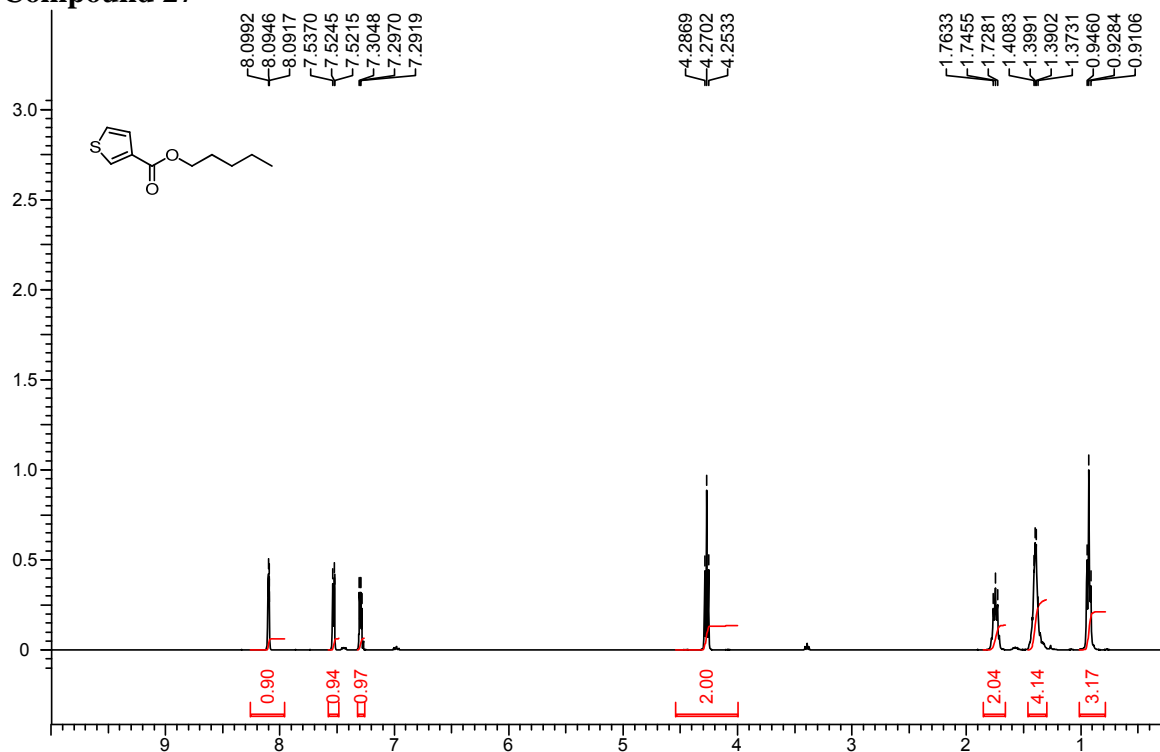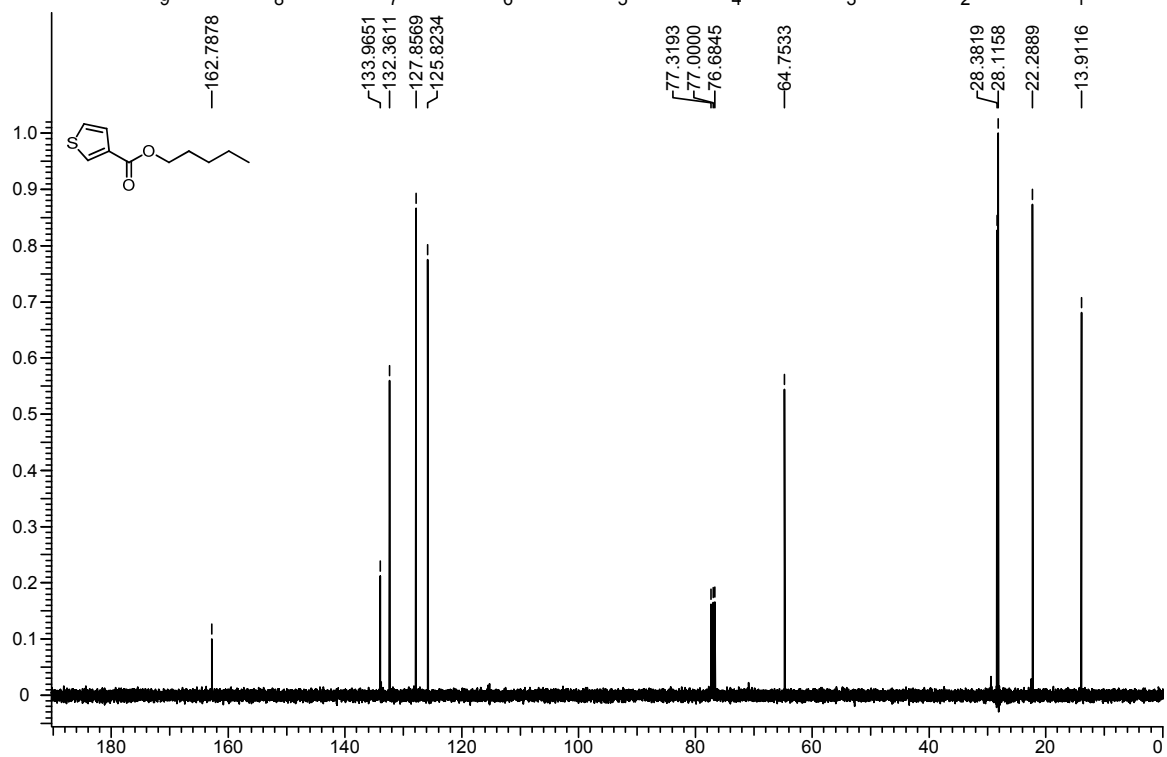

# Compound 17

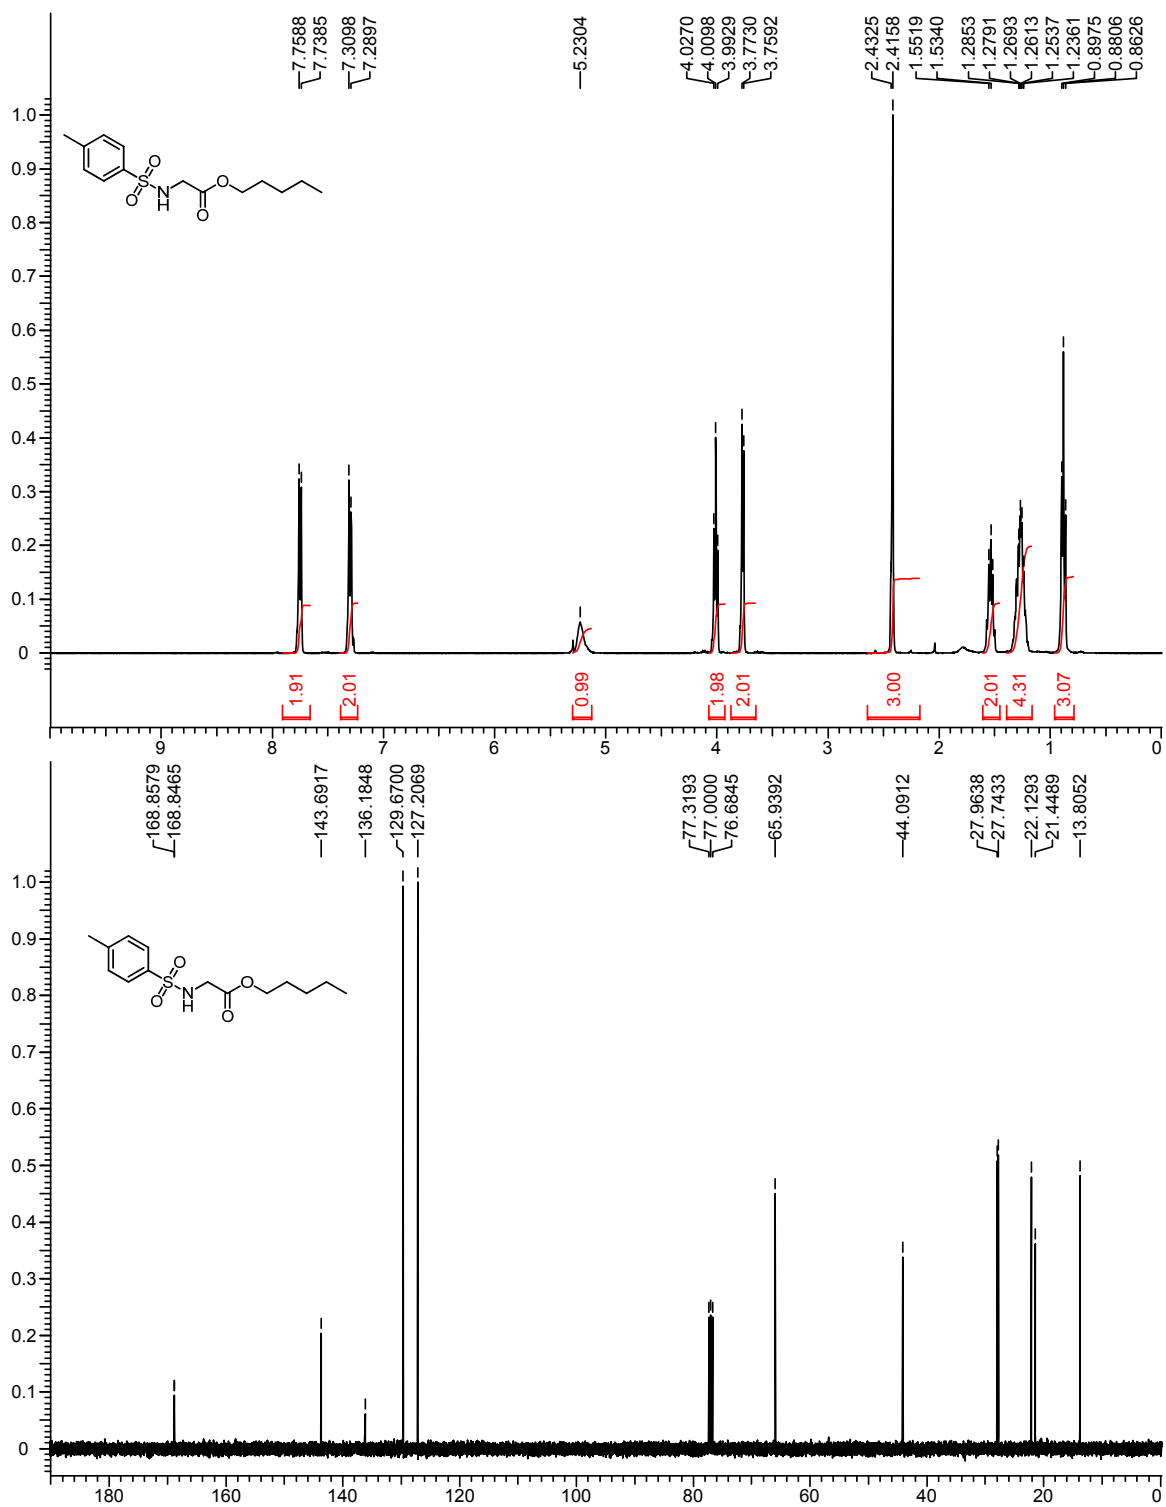



# Compound 18

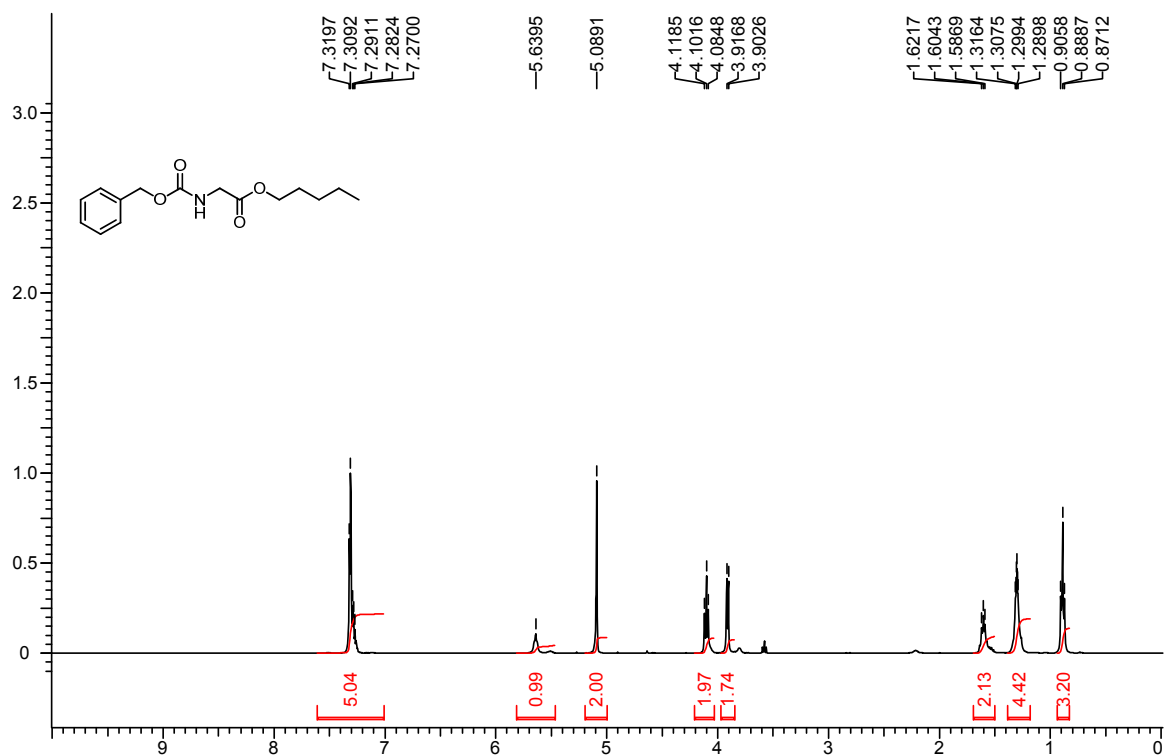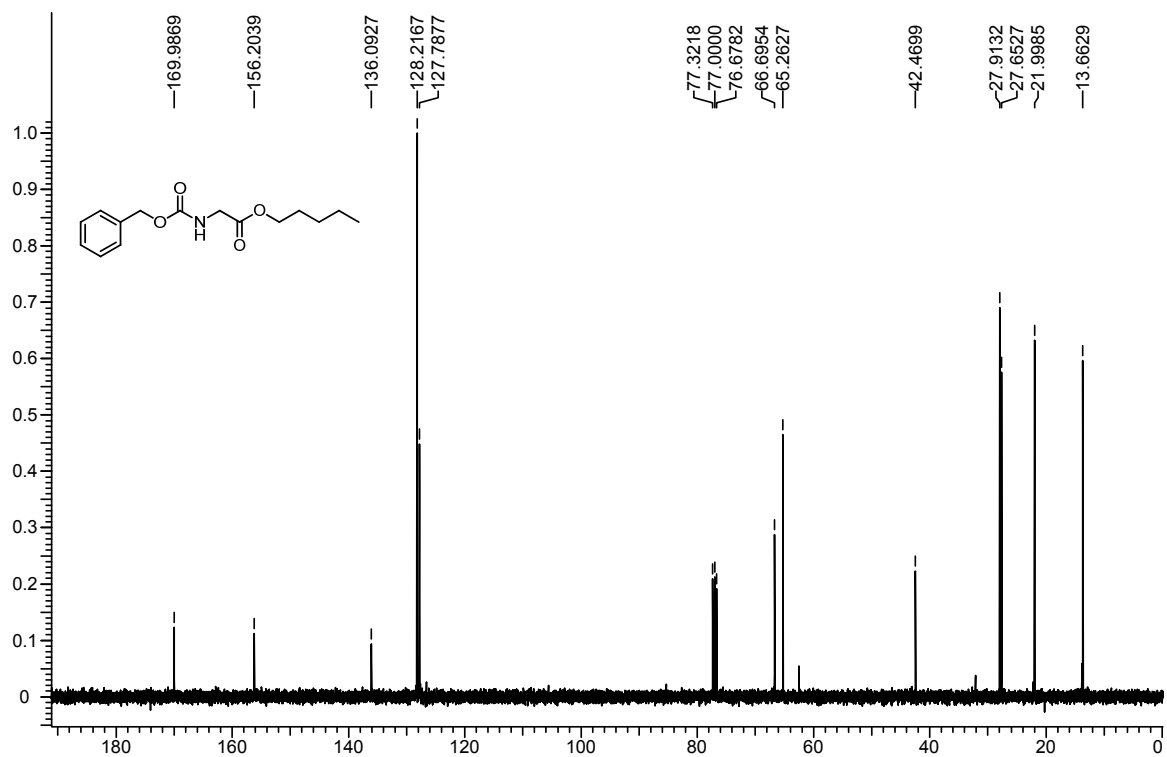

# Compound 16

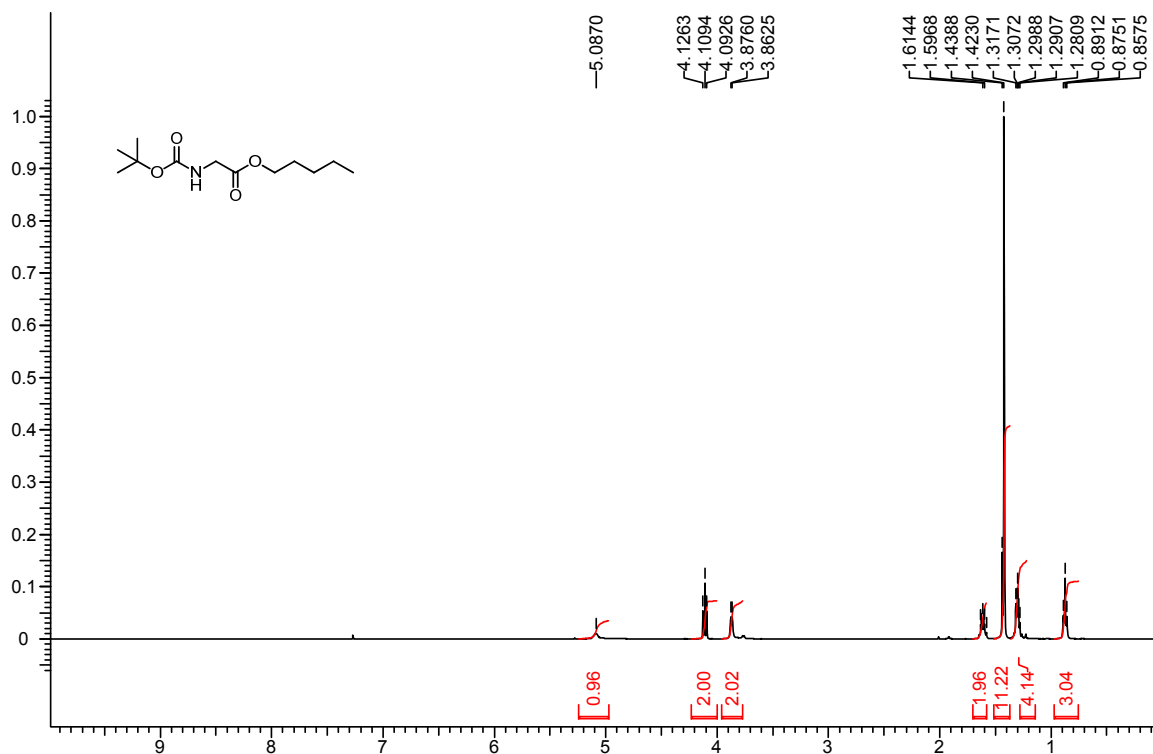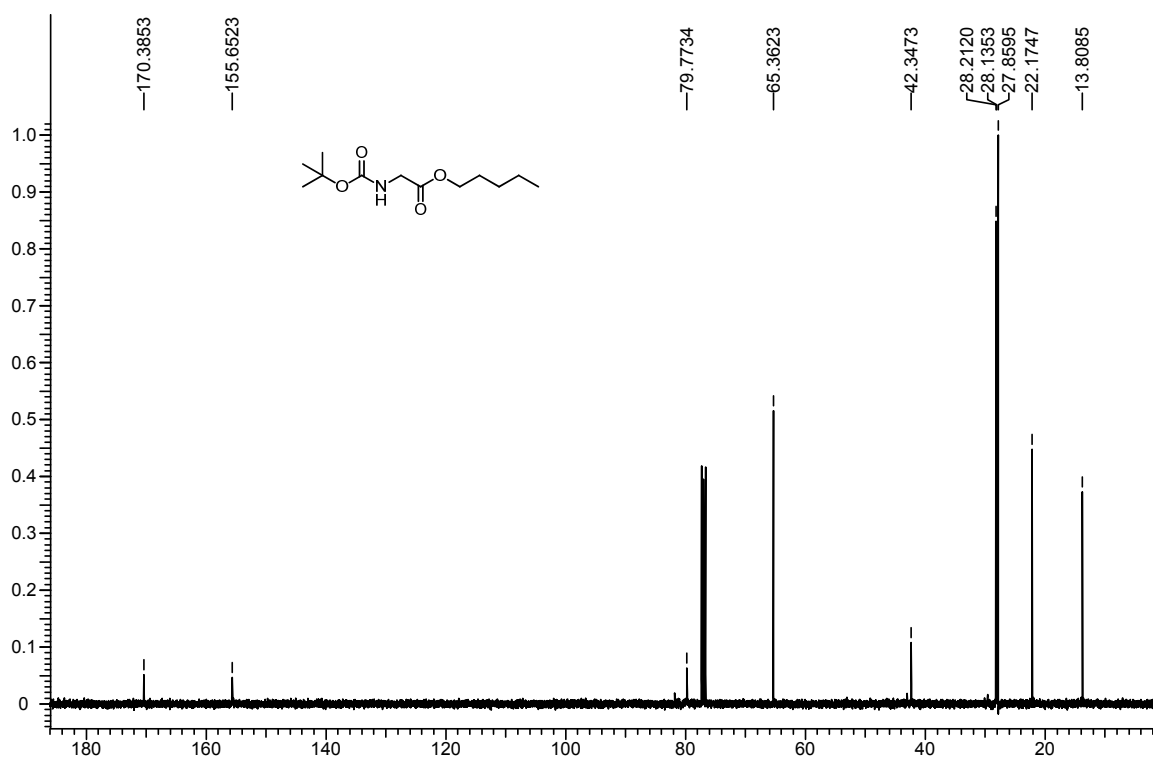

# Compound 22

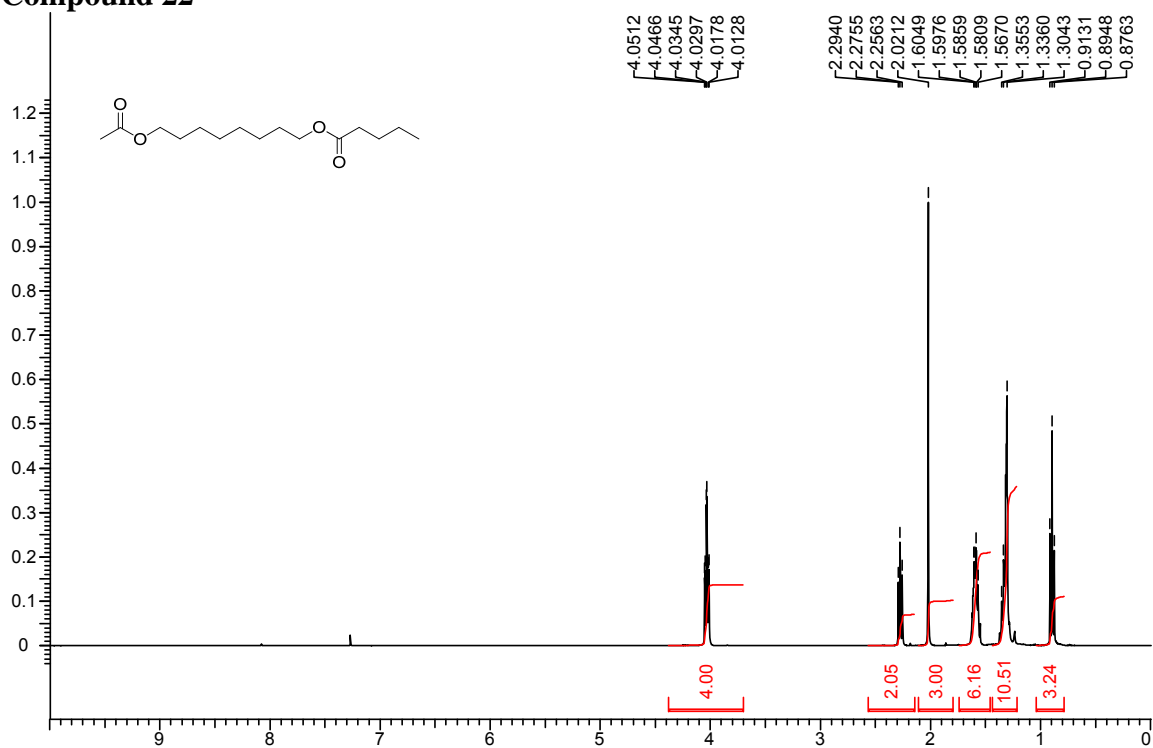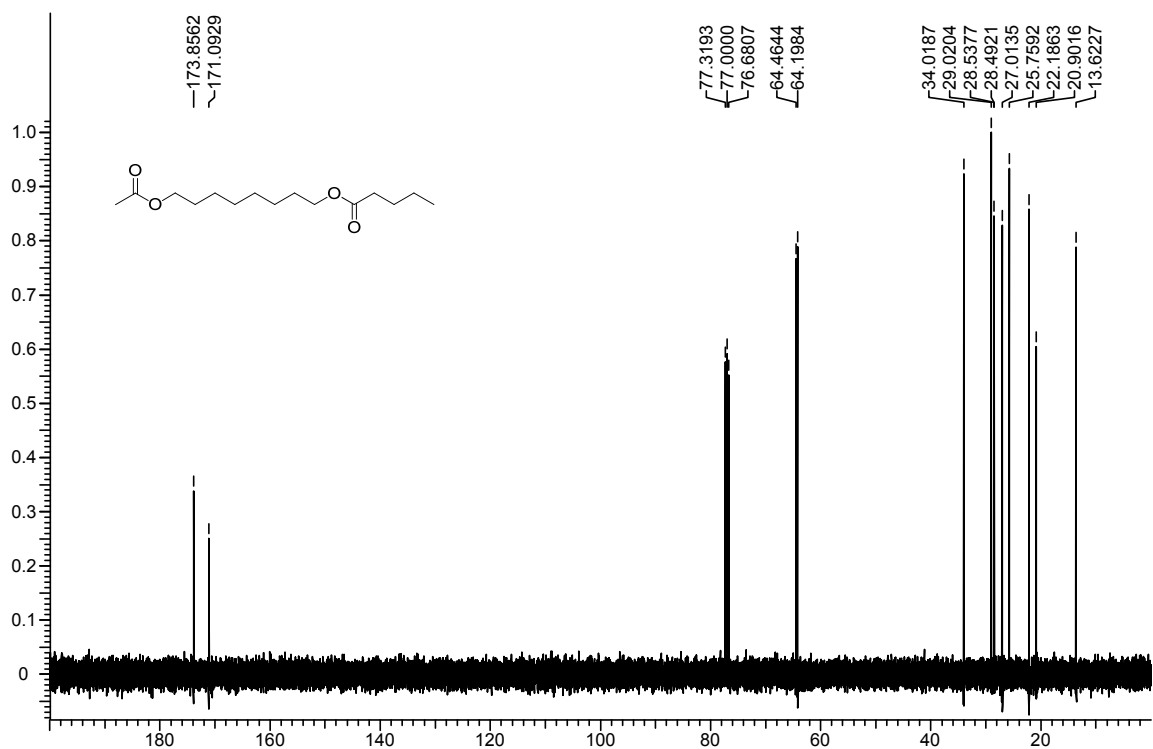

# Compound 23

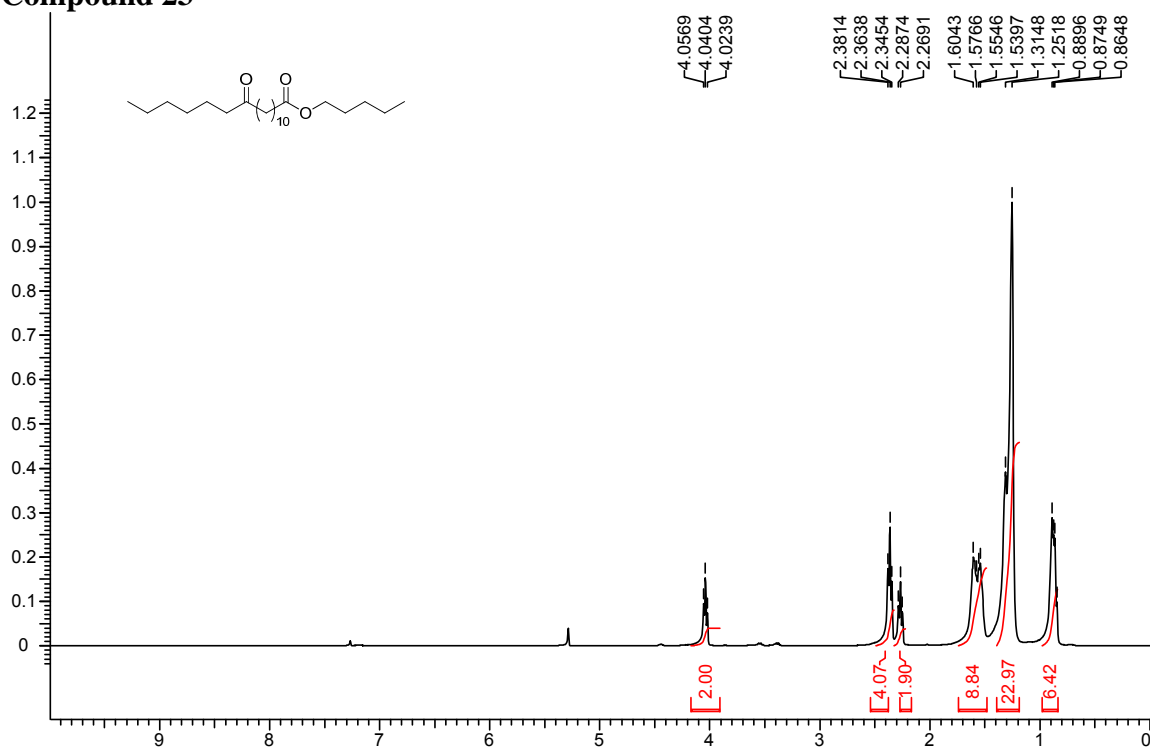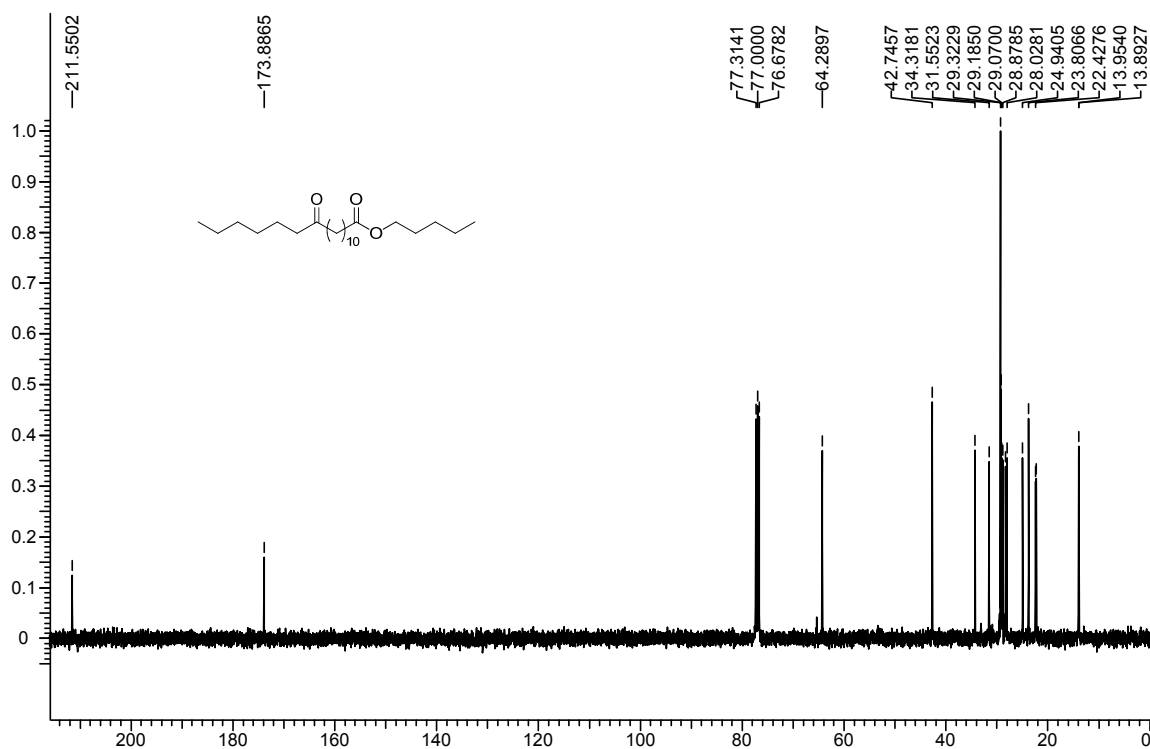

- 
- <sup>1</sup> Shriver, D. F.; Drezdon, M. A. in *The Manipulation of Air-Sensitive Compounds*; Wiley-VCH: New York, 1986.
- <sup>2</sup> Leatherbarrow, R. J.; Mo, B.; Offermann, D. A.; Sejberg, J. J. P.; Spivey, A. C.; McKendrick, J. E.; Beavil, A. J.; Holdom, M. D.; Sutton, B. J.; Helm, B. A. *J. Org. Chem.* **2012**, *77*, 3197-3214.
- <sup>3</sup> Keinan, E.; Sinha, S. C.; Yazbak, A. *J. Org. Chem.* **1998**, *63*, 5863 – 5868.
- <sup>4</sup> Naka, H.; Nishimura, T.; Noyori, R.; Tachinami, T.; Ushimaru, R. *J. Am. Chem. Soc.* **2013**, *135*, 50 – 53.
- <sup>5</sup> Lumbroso, A.; Abermil, N.; Breit, B. *Chem. Sci.* **2012**, *3*, 789.
- <sup>6</sup> Delgado, M.; Martin, J. D. *J. Org. Chem.* **1999**, *64*, 4798-4816.
- <sup>7</sup> Zhu, H.; Wickenden, J. G.; Campbell, N. E.; Leung, J. C. T.; Johnson, K. M.; Sammis, G. M. *Org. Lett.* **2009**, *11*, 2019, 2022.
- <sup>8</sup> Karmee, S. K. *Synth. Comm.* **2013**, *43*, 450-455.
- <sup>9</sup> Morales-Serna, J. A.; Sanchez, E.; Velazquez, R.; Bernal, J.; Garcia-Rios, E.; Gavino, R.; Negron-Silva, G.; Cardenas, J. *Org. Biomol. Chem.* **2010**, *8*, 4940-4948.
- <sup>10</sup> Joshi, K. B.; Verma, S. *Angew. Chem., Int. Ed.* **2008**, *47*, 2860-2863.
- <sup>11</sup> Framis, V.; Camps, F.; Clapes, P. *Tetrahedron Lett.* **2004**, *45*, 5031-5033.
- <sup>12</sup> Abraham, S.; Lan, Y.; Lam, R. S. H.; Grahame, D. A. S.; Kim, J. J. H.; Weiss, R. G.; Rogers, M. A. *Langmuir* **2012**, *28*, 4955-4964.
- <sup>13</sup> Still, W. C.; Kahn, M.; Mitra, A. *J. Org. Chem.* **1978**, *43*, 2923-2925.
- <sup>14</sup> Bédard, A.-C.; Collins, S. K. *J. Am. Chem. Soc.* **2011**, *133*, 19976-19981.
- <sup>15</sup> Delphis, C. *Cis-isoambrettolide of High Degree of Isomer Purity and Use Thereof* **2001**, Patent No.: US 6,284,900 B1.
- <sup>16</sup> Solvhoj, A.; Madsen, R. *Organometallics* **2011**, *30*, 6044-6048.
- <sup>17</sup> Pereira, G. R.; Brandao, G. C.; Arantes, L. M.; de Oliveira Jr., H. A.; de Paula, R. C.; do Nascimento, M. F. A.; dos Santos, F. M.; da Rocha, R. K.; Lopez, J. C. D.; de Oliveira, A. B. *Eur. J. Med. Chem.* **2014**, *73*, 295-309.
- <sup>18</sup> Srimani, D.; Balarama, E.; Gnanaprakasam, B.; Ben-David, Y.; Milstein, D. *Adv. Synth. Cat.* **2012**, *354* (13), 2403-2406.
- <sup>19</sup> Ahmad, I.; Malik, A.; Afza, N.; Anis, I.; Fatima, I.; Nawaz, S. A.; Tareen, R. B.; Iqbal, C. *Zeitschrift für Naturforschung – Section B Journal of Chemical Sciences* **2005**, *60*, 2403-2406.
